# Supplementary material for: An Effective and Promising Strategy for Plant Protection: Synthesis of L-Carvone-Based Thiazolinone–Hydrazone/Nanochitosan Complexes with Antifungal Activity and Sustained Releasing Performance
Source: MDPI journal article supplement (doi:10.3390/ijms25094595), 2024-04-23
Supplement: s1 [file s1]

Supplementary Material for

# **An Effective and Promising Strategy for Plant Protection: Synthesis of *L*-Carvone-Based Thiazolinone–Hydrazone/ Nanochitosan Complexes with Antifungal Activity and Sustained Releasing Performance**

Baoyu Li <sup>1,2</sup>, Wengui Duan <sup>1,2,\*</sup>, Guishan Lin <sup>1,2,\*</sup>, Xianli Ma <sup>1,2</sup>, Rongzhu Wen <sup>1,2</sup> and Zhaolei Zhang <sup>1,2</sup>

<sup>1</sup> School of Chemistry and Chemical Engineering, Guangxi University, Nanning 530004, China; baoyuli1111@163.com (B.L.); maxl0919@gxu.edu.cn (X.M.); rongzhuwen@163.com (R.W.); 2114301097@st.gxu.edu.cn (Z.Z.)

<sup>2</sup> Guangxi Colleges and Universities Key Laboratory of Applied Chemistry Technology and Resource Development, Nanning 530004, China

\* Correspondence: wgduan@gxu.edu.cn (W.D.); gslin@gxu.edu.cn (G.L.)

**Table S1.** Antifungal activity of compounds **4a** ~ **4y** against eight phytopathogenic fungi.

| Compounds                                              | Relative Inhibition Rates/% |      |      |      |      |      |      |      |
|--------------------------------------------------------|-----------------------------|------|------|------|------|------|------|------|
|                                                        | FO                          | CA   | PP   | AS   | GZ   | RS   | BM   | CO   |
| <b>4a</b> (Ar = Ph)                                    | 26.4                        | 68.5 | 17.1 | 63.7 | 31.7 | 25.3 | 17.8 | 36.5 |
| <b>4b</b> (Ar = 2-CH <sub>3</sub> Ph)                  | 30.0                        | 66.1 | 17.1 | 63.7 | 31.7 | 25.3 | 19.8 | 36.5 |
| <b>4c</b> (Ar = 3-CH <sub>3</sub> Ph)                  | 24.5                        | 61.2 | 10.0 | 58.8 | 20.9 | 22.9 | 25.7 | 34.5 |
| <b>4d</b> (Ar = 4-CH <sub>3</sub> Ph)                  | 22.7                        | 61.2 | 10.0 | 53.9 | 29.6 | 25.3 | 19.8 | 32.4 |
| <b>4e</b> (Ar = 2-Cl Ph)                               | 24.5                        | 61.2 | 52.9 | 51.5 | 10.0 | 26.5 | 15.9 | 28.4 |
| <b>4f</b> (Ar = 3-Cl Ph)                               | 19.1                        | 66.1 | 35.0 | 61.2 | 18.7 | 24.1 | 17.8 | 28.4 |
| <b>4g</b> (Ar = 4-Cl Ph)                               | 28.2                        | 71.0 | 35.0 | 66.1 | 38.3 | 22.9 | 23.7 | 40.6 |
| <b>4h</b> (Ar = 2-F Ph)                                | 62.7                        | 61.2 | 88.6 | 66.1 | 53.5 | 22.9 | 19.8 | 61.0 |
| <b>4i</b> (Ar = 3-F Ph)                                | 19.1                        | 58.8 | 38.6 | 49.0 | 10.0 | 26.5 | 15.9 | 28.4 |
| <b>4j</b> (Ar = 4-F Ph)                                | 44.5                        | 71.0 | 70.7 | 53.9 | 31.7 | 20.6 | 57.1 | 61.0 |
| <b>4k</b> (Ar = 2-OCH <sub>3</sub> Ph)                 | 26.4                        | 66.1 | 35.0 | 66.1 | 20.9 | 21.8 | 25.7 | 36.5 |
| <b>4l</b> (Ar = 3-OCH <sub>3</sub> Ph)                 | 35.5                        | 71.0 | 35.0 | 68.5 | 27.4 | 20.6 | 27.6 | 44.7 |
| <b>4m</b> (Ar = 4-OCH <sub>3</sub> Ph)                 | 19.1                        | 58.8 | 60.0 | 61.2 | 36.1 | 22.9 | 15.9 | 30.4 |
| <b>4n</b> (Ar = 2-NO <sub>2</sub> Ph)                  | 24.5                        | 68.5 | 52.9 | 58.8 | 10.0 | 20.6 | 19.8 | 28.4 |
| <b>4o</b> (Ar = 4-NO <sub>2</sub> Ph)                  | 30.0                        | 66.1 | 70.7 | 68.5 | 27.4 | 22.9 | 33.5 | 40.6 |
| <b>4p</b> (Ar = 3-CN Ph)                               | 28.2                        | 71.0 | 60.0 | 63.7 | 40.4 | 21.8 | 19.8 | 28.4 |
| <b>4q</b> (Ar = 3-Br Ph)                               | 30.0                        | 68.5 | 10.0 | 66.1 | 36.1 | 22.9 | 21.8 | 32.4 |
| <b>4r</b> (Ar = 3-OH Ph)                               | 22.7                        | 58.8 | 52.9 | 53.9 | 10.0 | 22.9 | 15.9 | 30.4 |
| <b>4s</b> (Ar = 4-OCF <sub>3</sub> Ph)                 | 26.4                        | 68.5 | 52.9 | 56.3 | 20.9 | 20.6 | 15.9 | 32.4 |
| <b>4t</b> (Ar = 3-CF <sub>3</sub> Ph)                  | 24.5                        | 61.2 | 70.7 | 61.2 | 27.4 | 22.9 | 19.8 | 36.5 |
| <b>4u</b> (Ar = 4-N(CH <sub>3</sub> ) <sub>2</sub> Ph) | 28.2                        | 71.0 | 60.0 | 68.5 | 27.4 | 20.6 | 15.9 | 36.5 |
| <b>4v</b> (Ar = 2, 4-OCH <sub>3</sub> Ph)              | 28.2                        | 66.1 | 52.9 | 61.2 | 31.7 | 26.5 | 19.8 | 34.5 |
| <b>4w</b> (Ar = 2-OH-3-OCH <sub>3</sub> Ph)            | 17.3                        | 63.7 | 70.7 | 66.1 | 40.4 | 20.6 | 27.6 | 32.4 |
| <b>4x</b> (Ar = $\alpha$ -thienyl)                     | 22.7                        | 66.1 | 70.7 | 58.8 | 31.7 | 25.3 | 19.8 | 28.4 |
| <b>4y</b> (Ar = $\alpha$ -pyridyl)                     | 19.1                        | 71.0 | 52.9 | 66.1 | 33.9 | 22.9 | 15.9 | 30.4 |
| chlorothalonil                                         | 87.2                        | 63.0 | 95.8 | 35.5 | 67.9 | 81.2 | 85.0 | 100  |

FO = *Fusarium Oxysporum* f. sp. *Cucumerinum*; CA = *Cercospora Arachidicola*; PP = *Phylospora Piricola*; AS = *Alternaria Solani*; GZ = *Gibberella Zeae*; RS = *Rhizoctonia Solani*; BM = *Bipolaris Maydis*; CO = *Colletotrichum Orbiculare*.

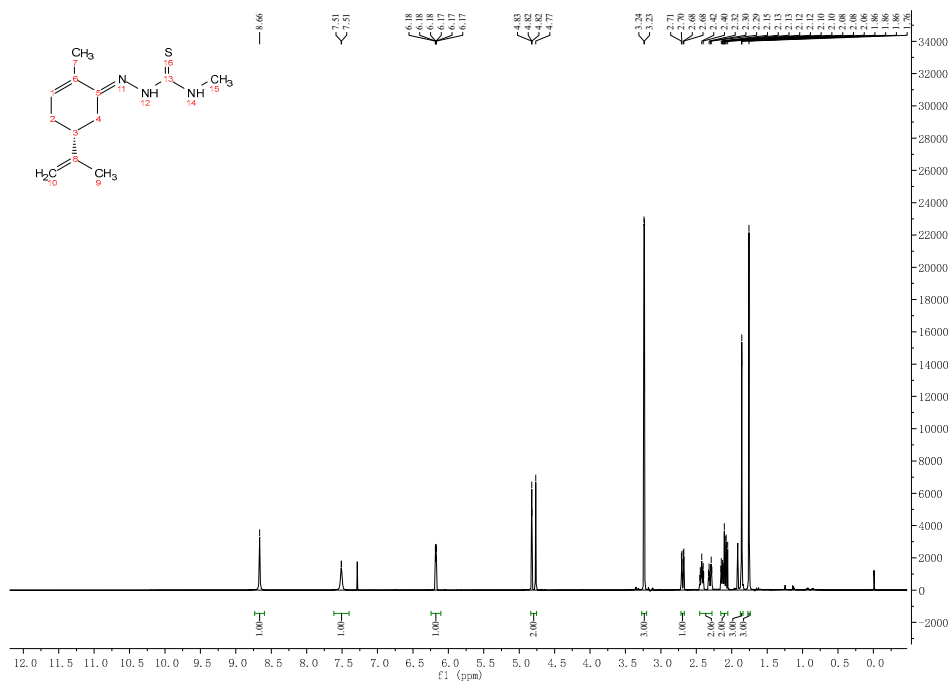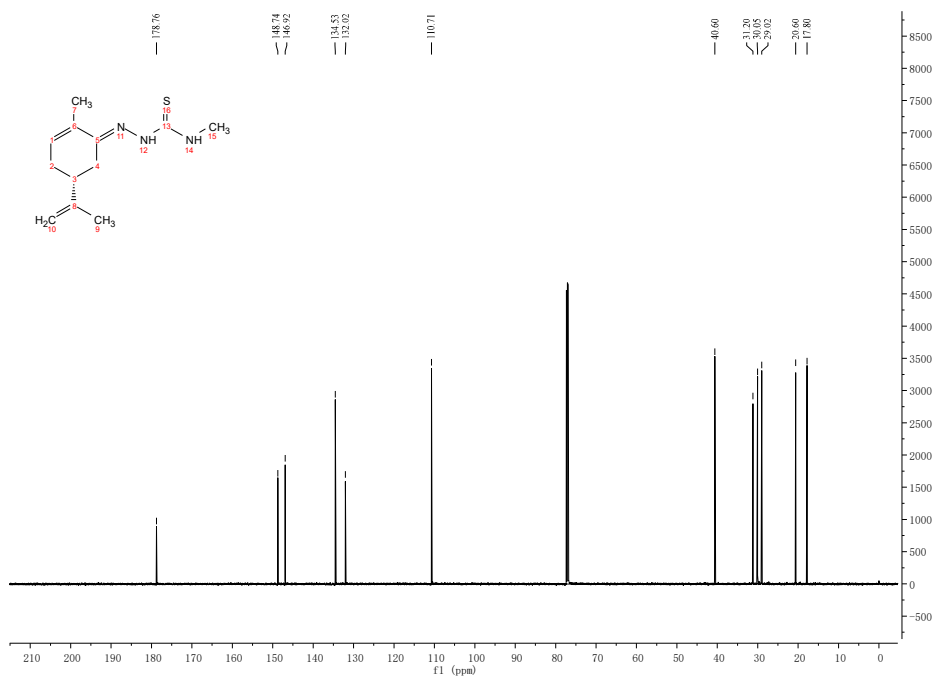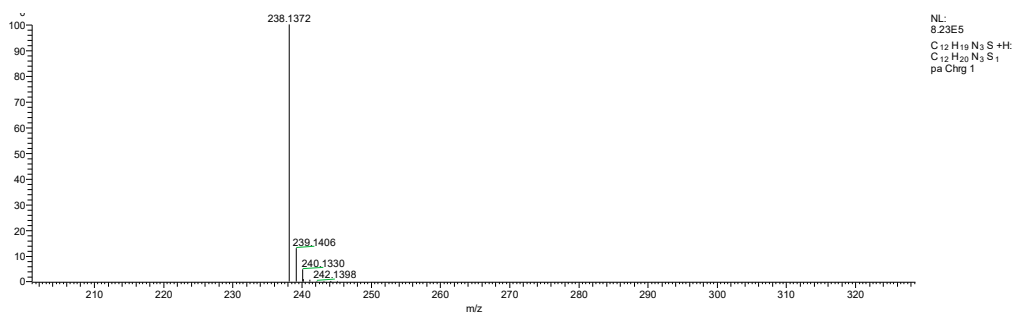

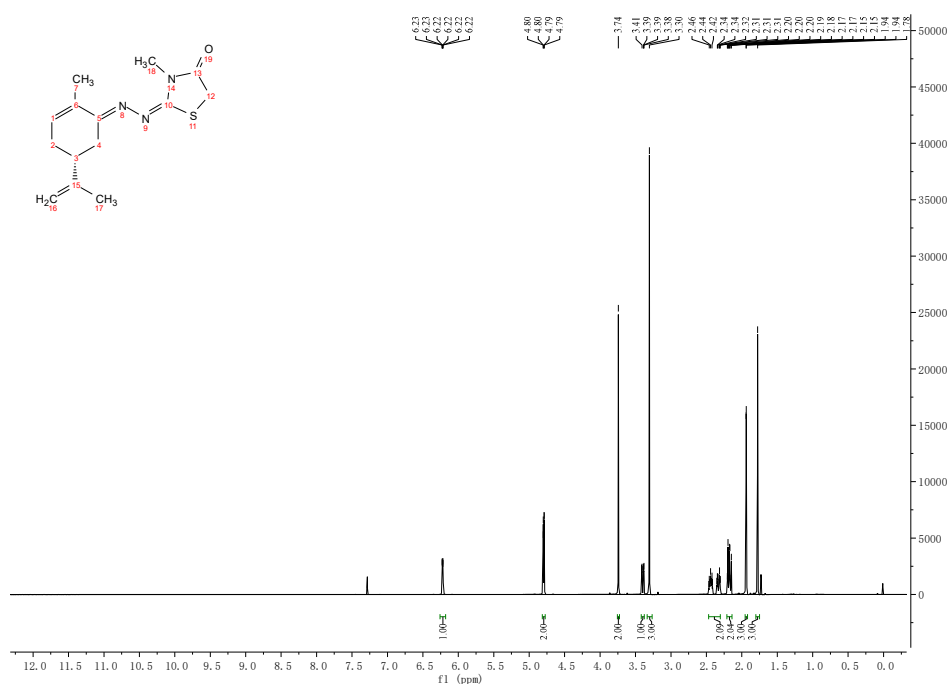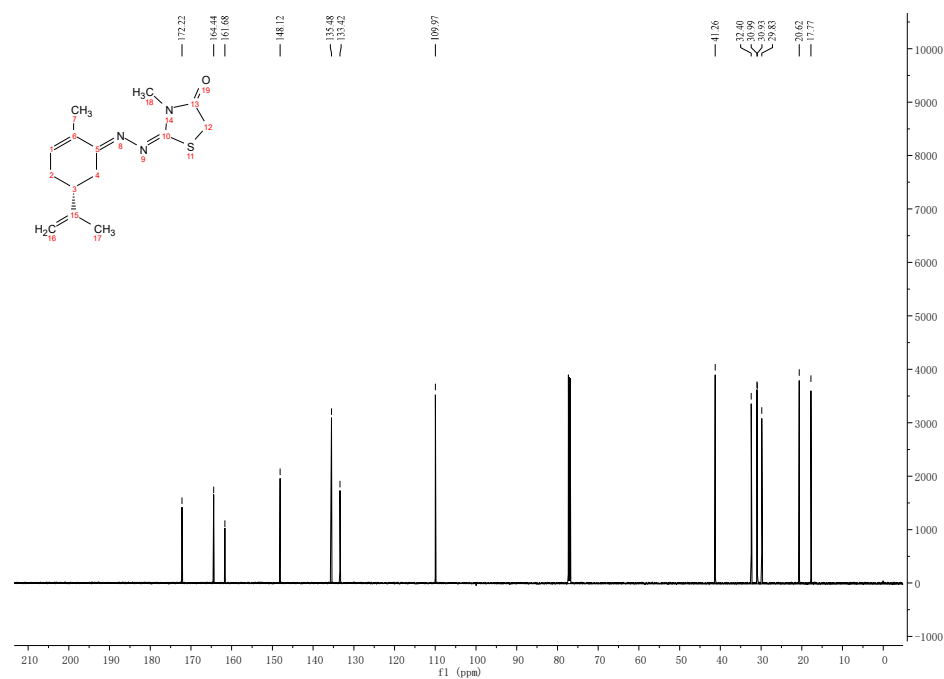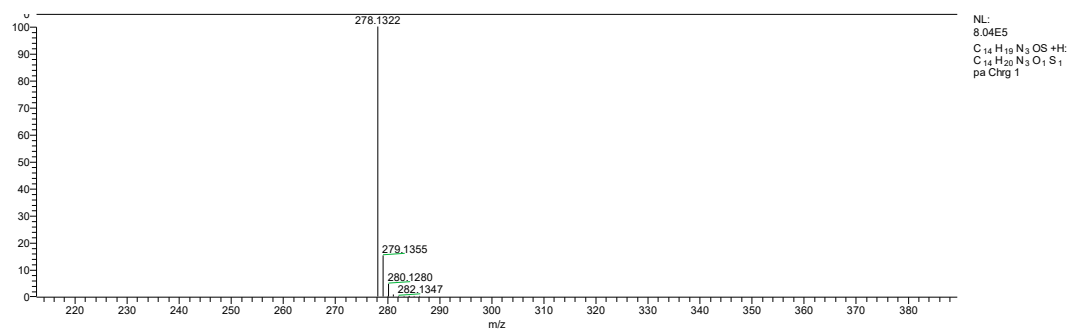

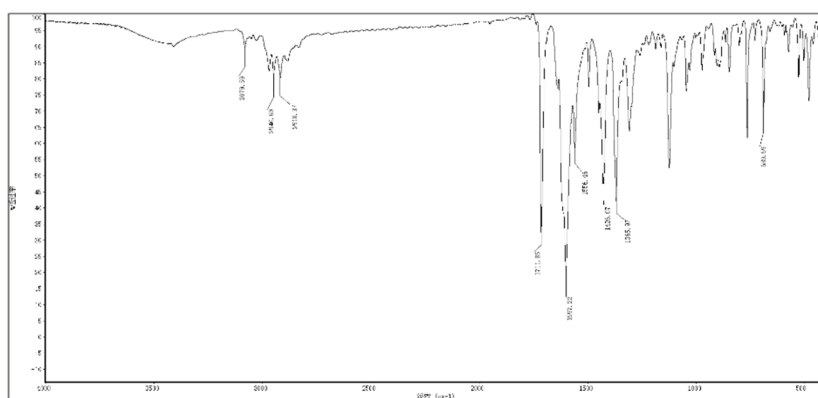

**Figure S7** FT-IR spectrum of compound **4a**.

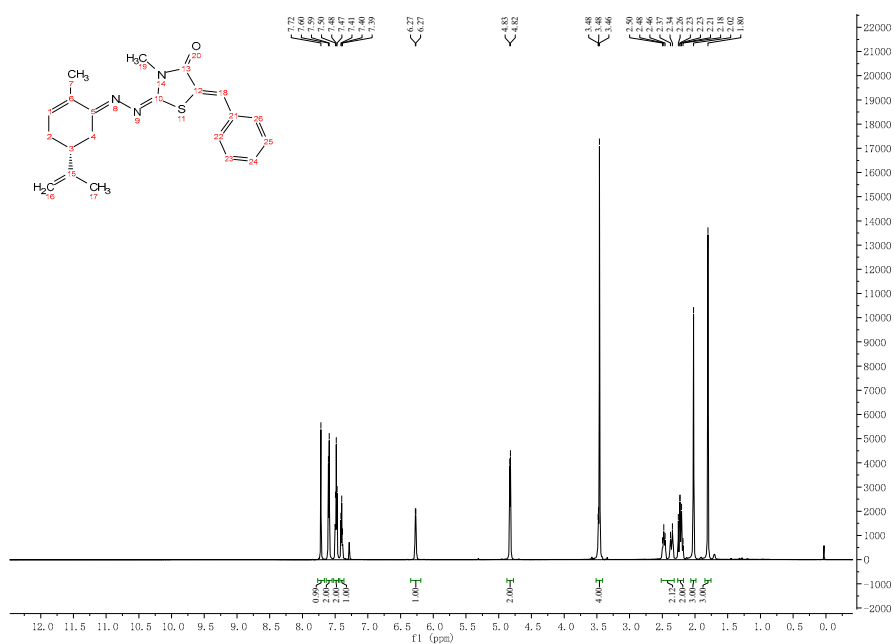

**Figure S8** <sup>1</sup>H NMR spectrum of compound **4a**.

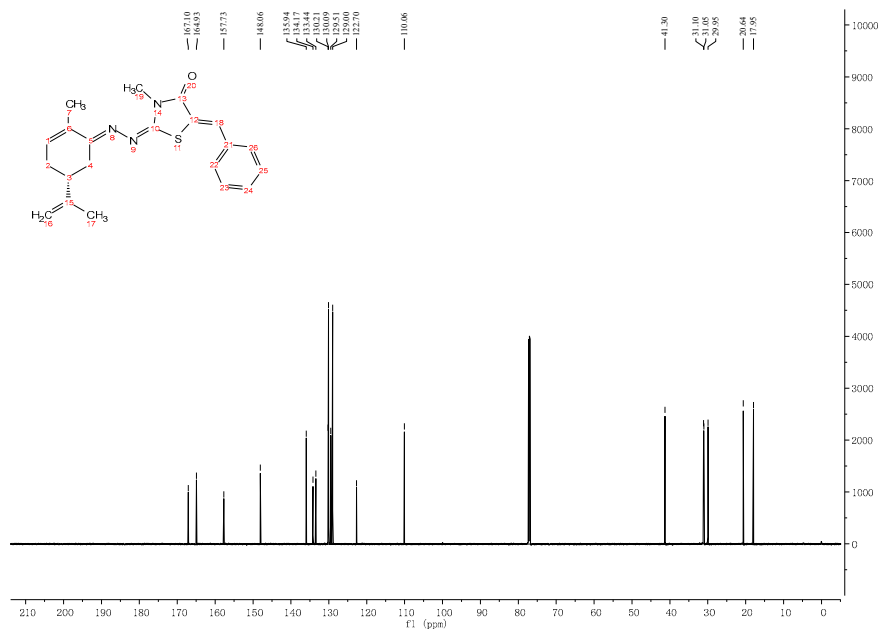

**Figure S9** <sup>13</sup>C NMR spectrum of compound **4a**.

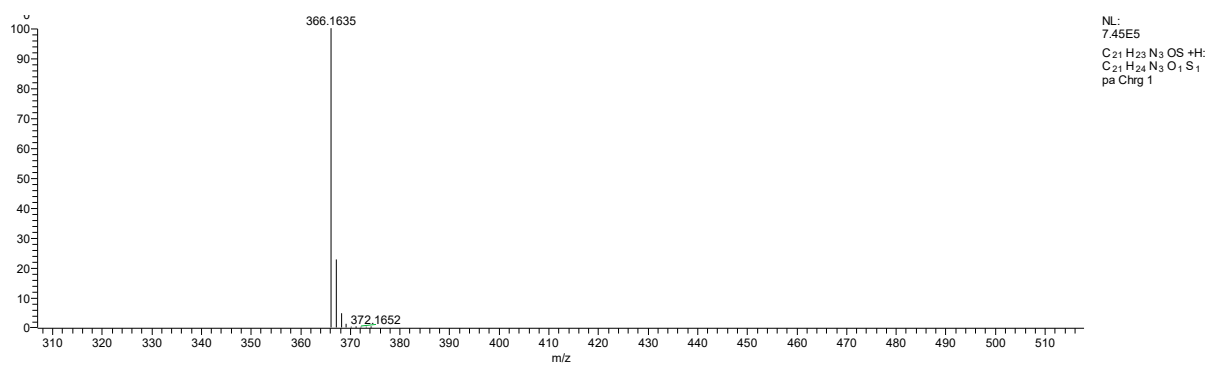

Figure S10 HRMS spectrum of compound 4a.

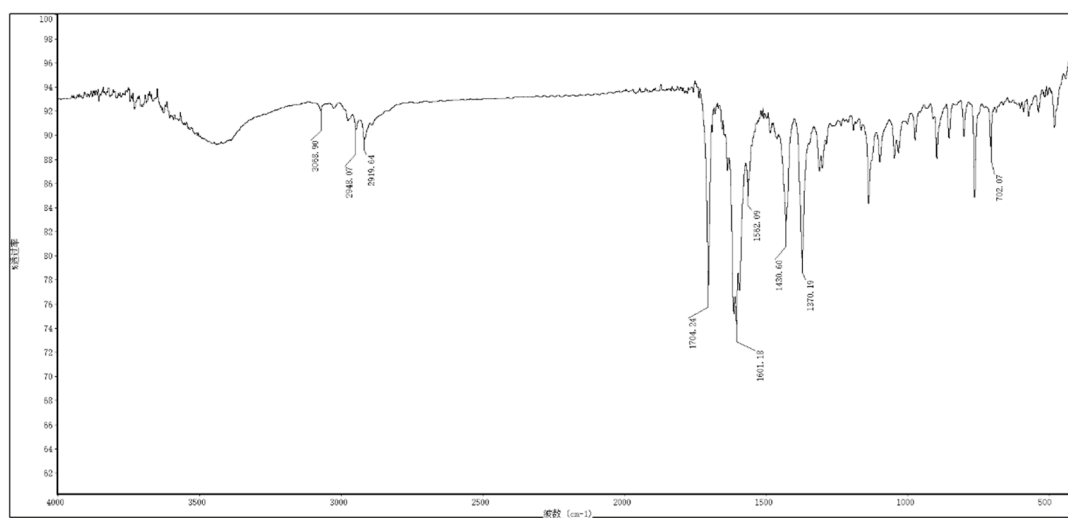

Figure S11 IR spectrum of compound 4b.

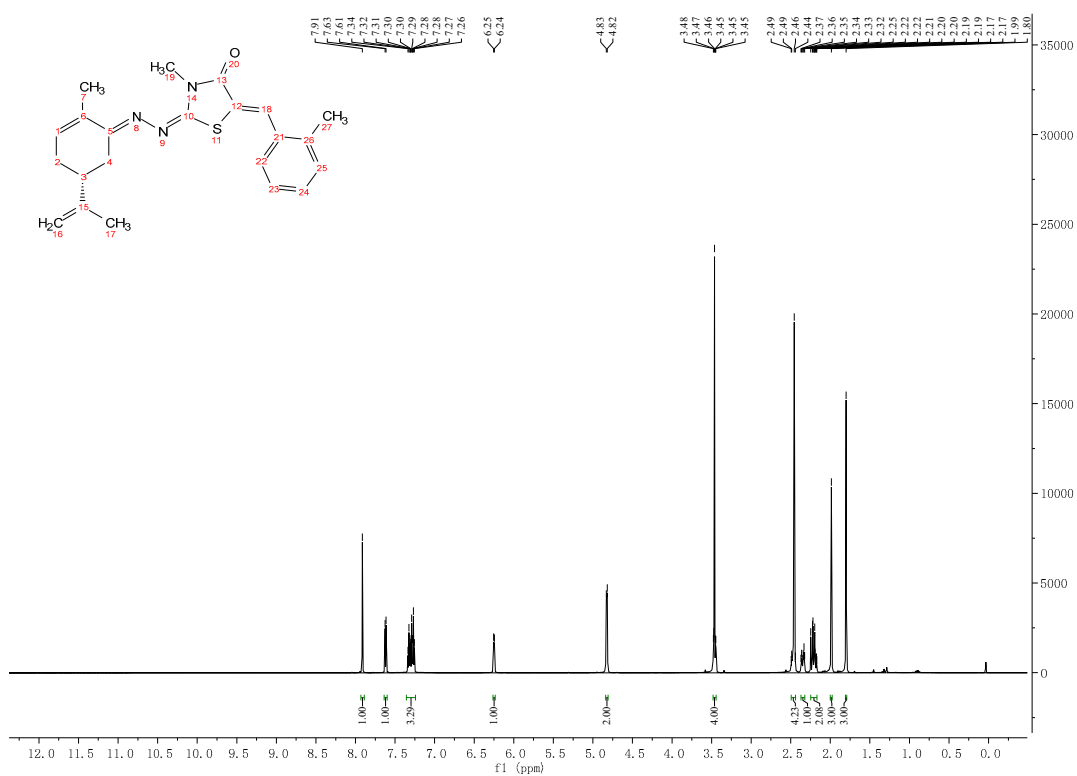

Figure S12 <sup>1</sup>H NMR spectrum of compound 4b.

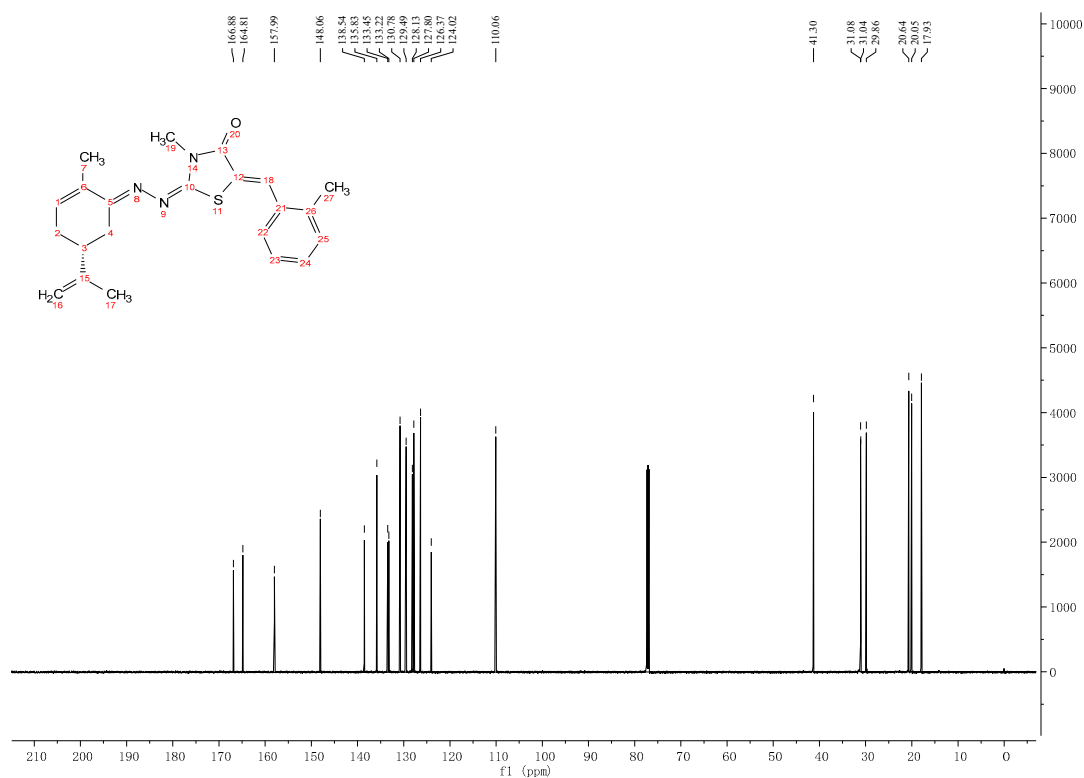

Figure S13  $^{13}\text{C}$  NMR spectrum of compound 4b.

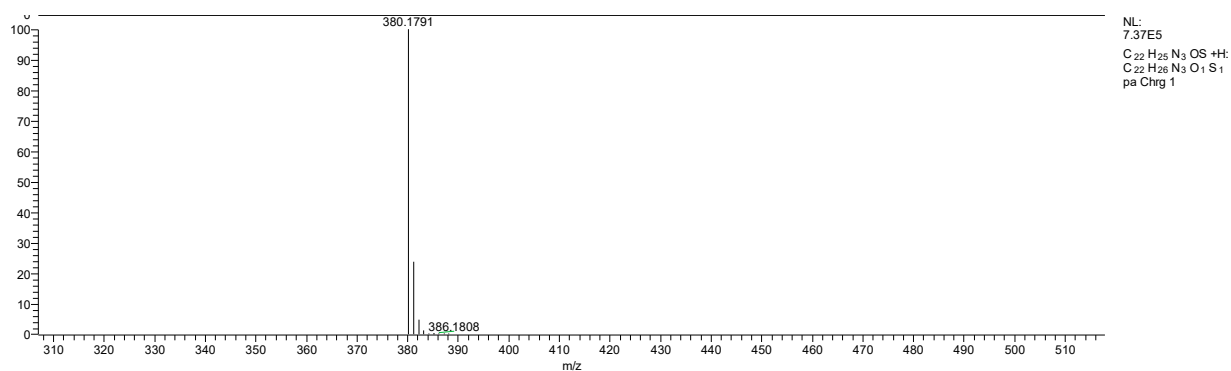

Figure S14 HRMS spectrum of compound 4b.

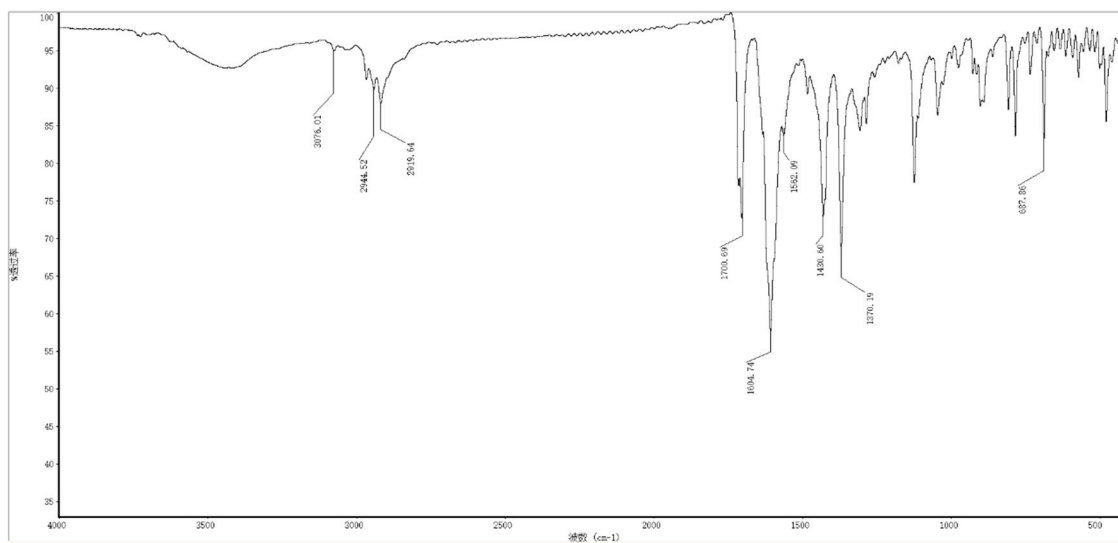

Figure S15 IR spectrum of compound 4c.

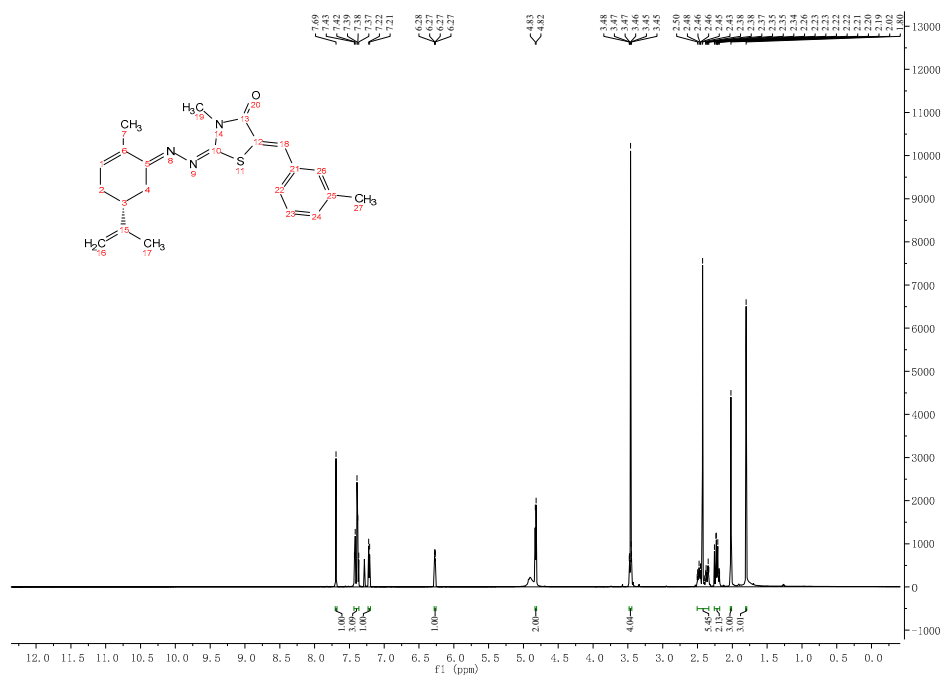

Figure S16  $^1\text{H}$  NMR spectrum of compound 4c.

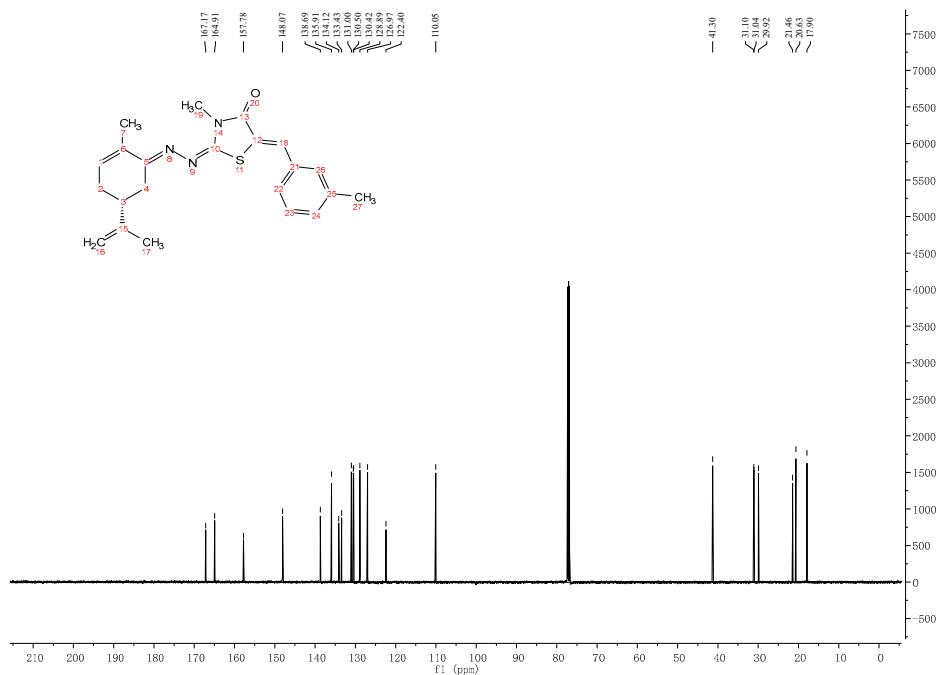

Figure S17  $^{13}\text{C}$  NMR spectrum of compound 4c.

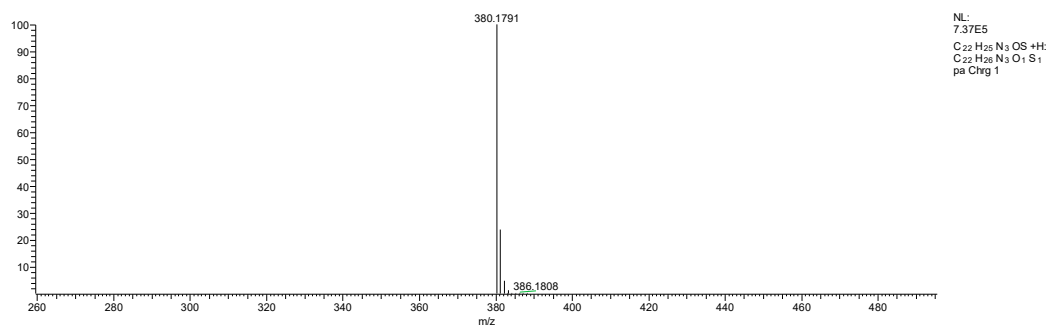

Figure S18 HRMS spectrum of compound 4c.



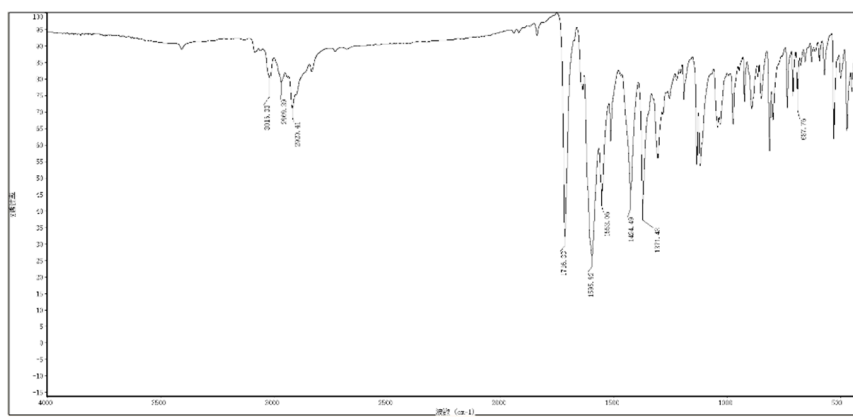

**Figure S19** IR spectrum of compound **4d**.

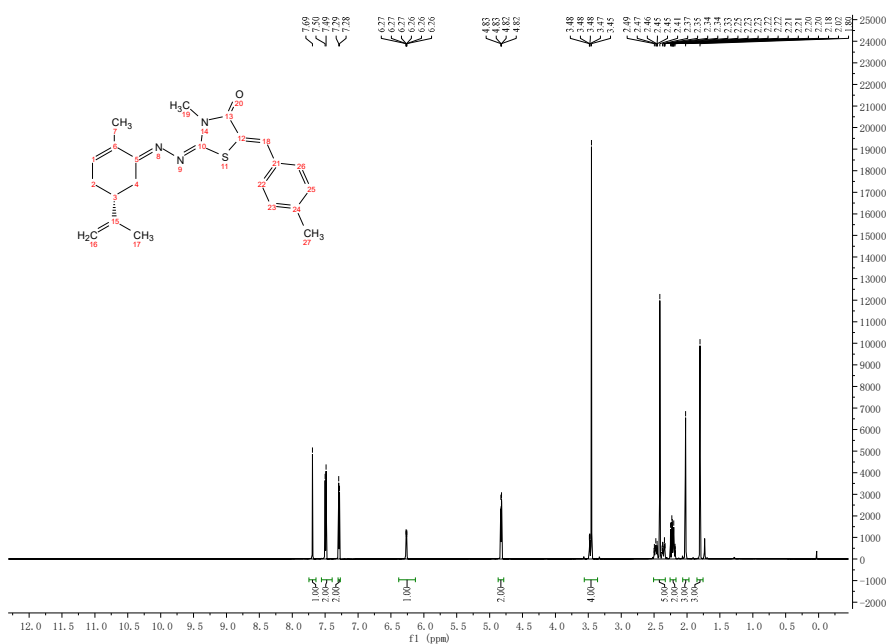

**Figure S20** <sup>1</sup>H NMR spectrum of compound **4d**.

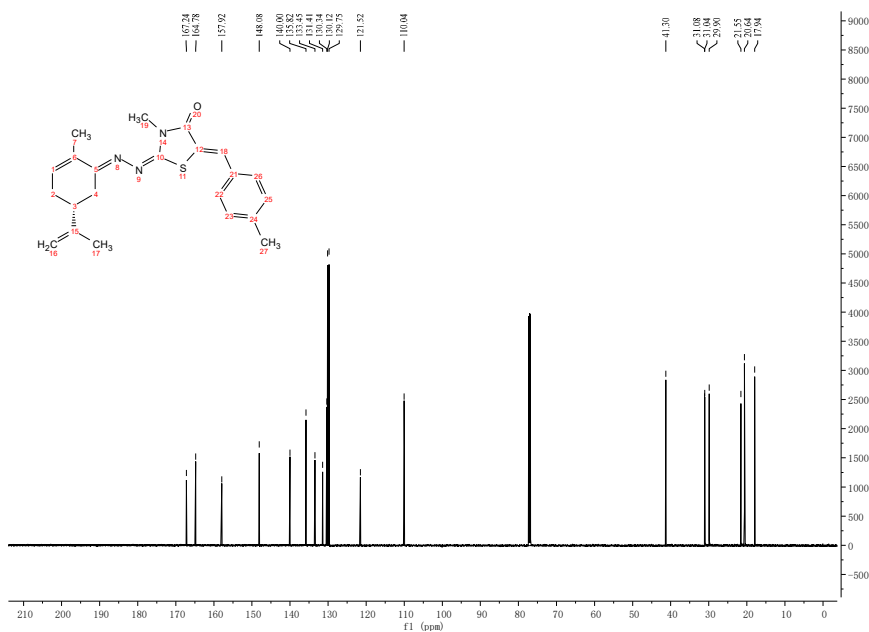

**Figure S21** <sup>13</sup>C NMR spectrum of compound **4d**.

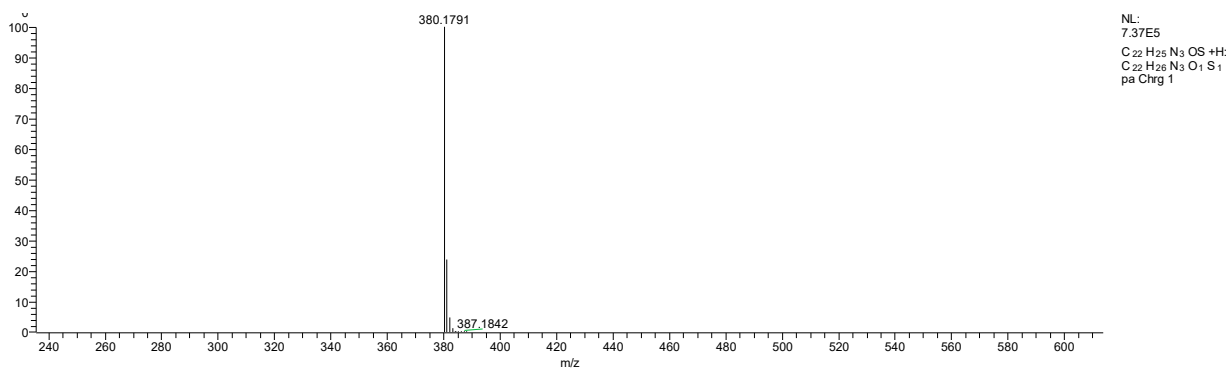

Figure S22 HRMS spectrum of compound 4d.

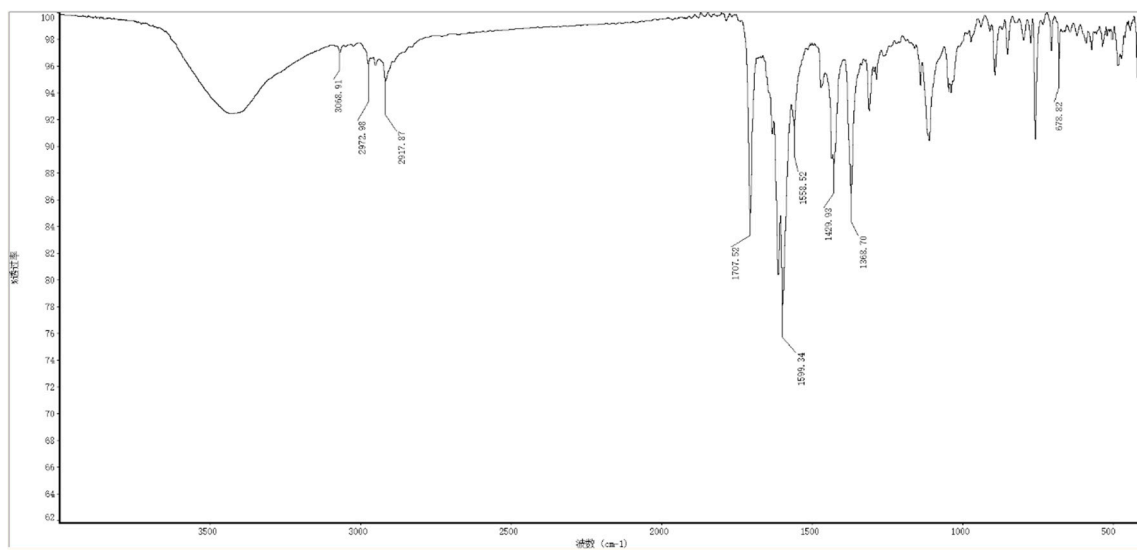

Figure S23 IR spectrum of compound 4e.

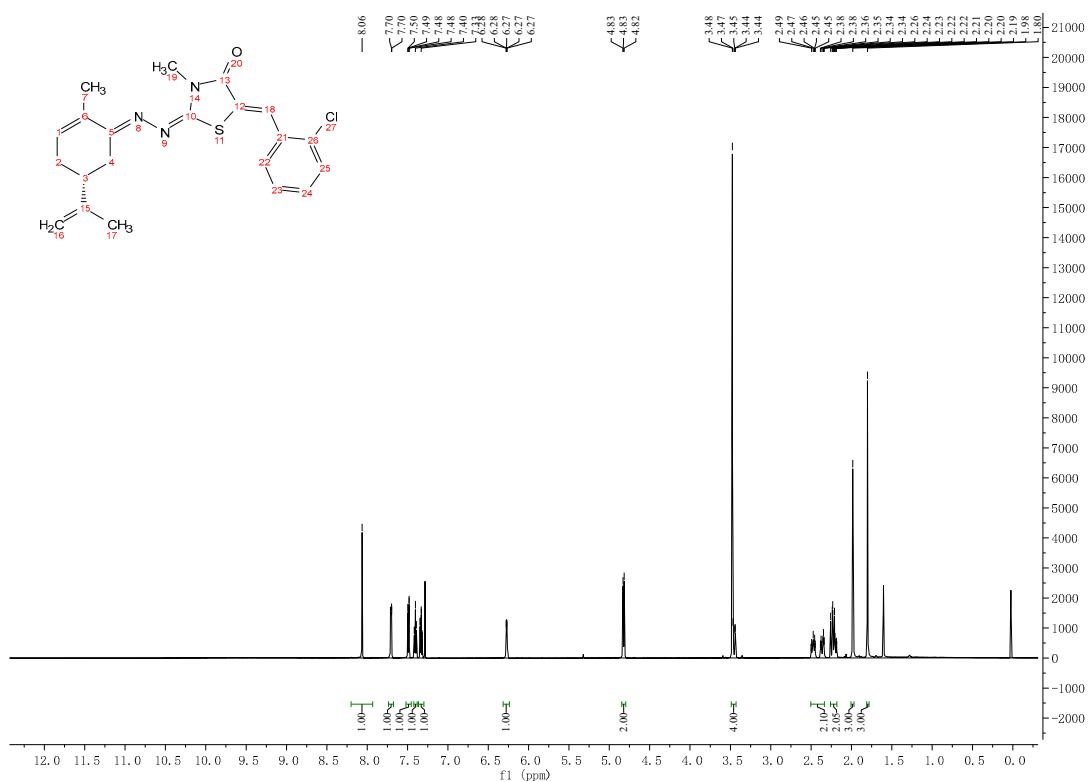

Figure S24 <sup>1</sup>H NMR spectrum of compound 4e.

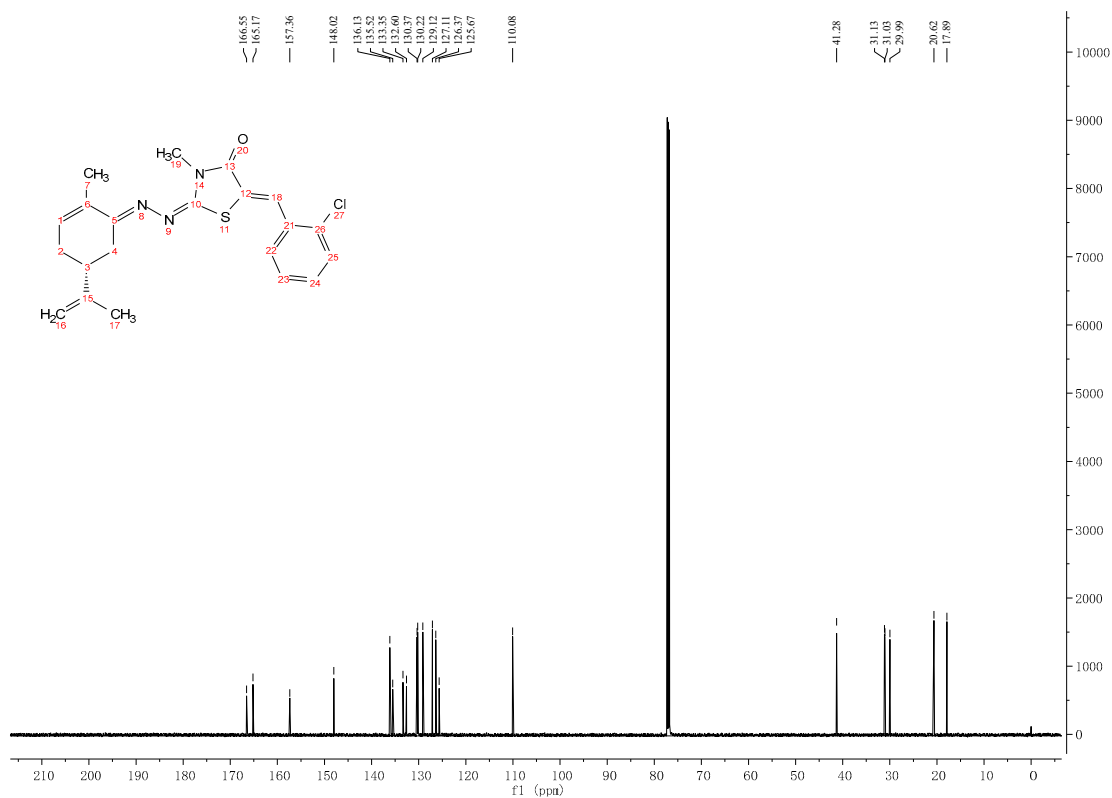

Figure S25  $^{13}\text{C}$  NMR spectrum of compound 4e.

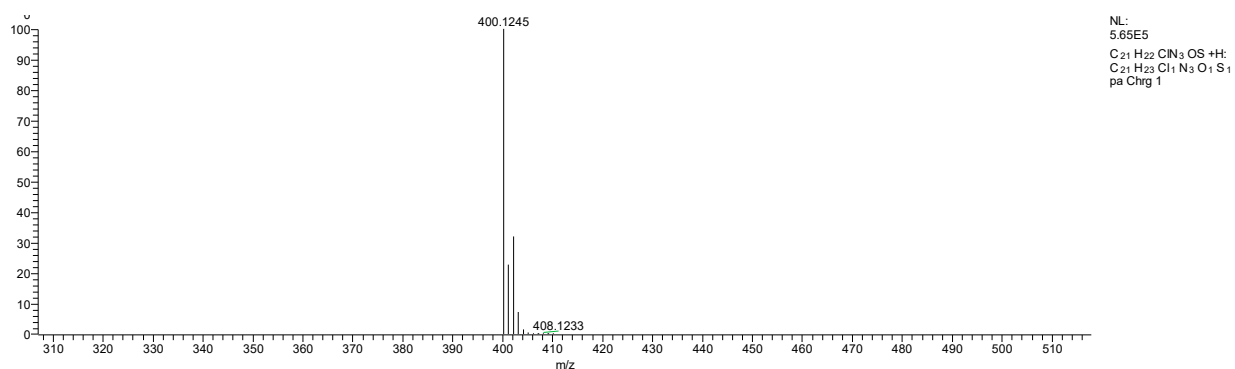

Figure S26 HRMS spectrum of compound 4e.

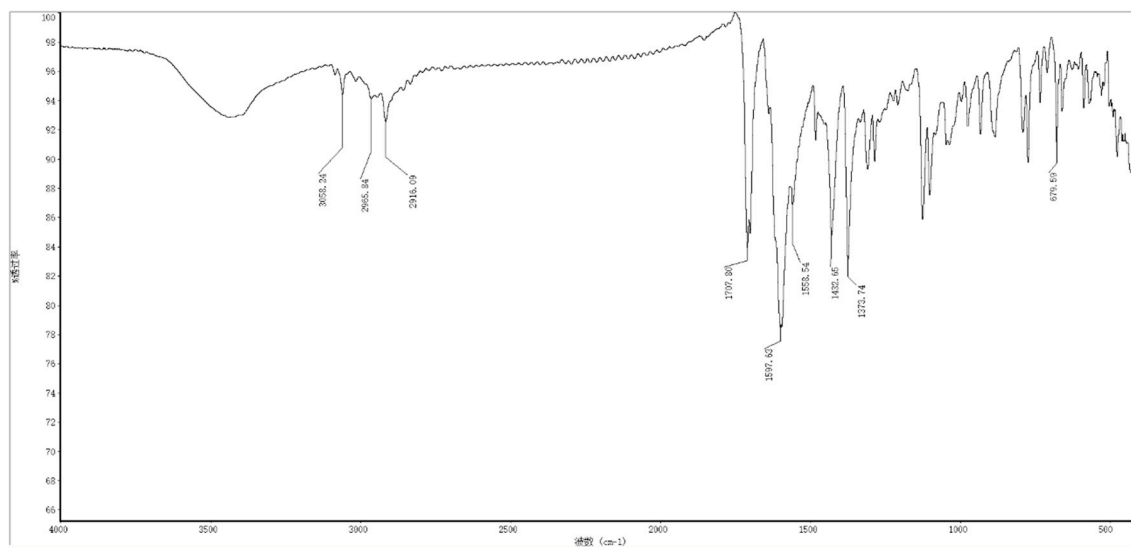

Figure S27 IR spectrum of compound 4f.

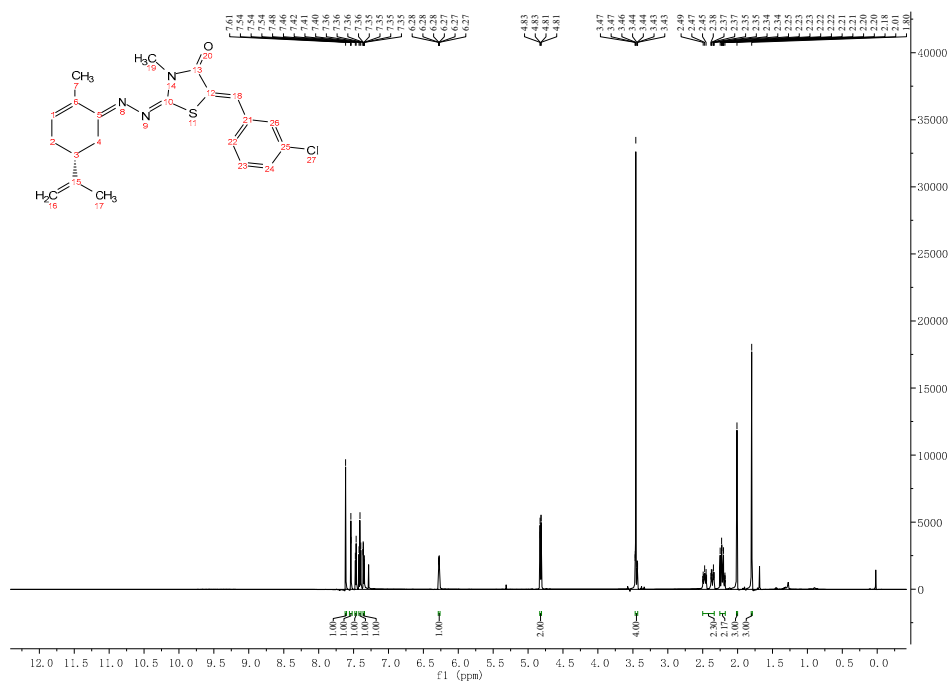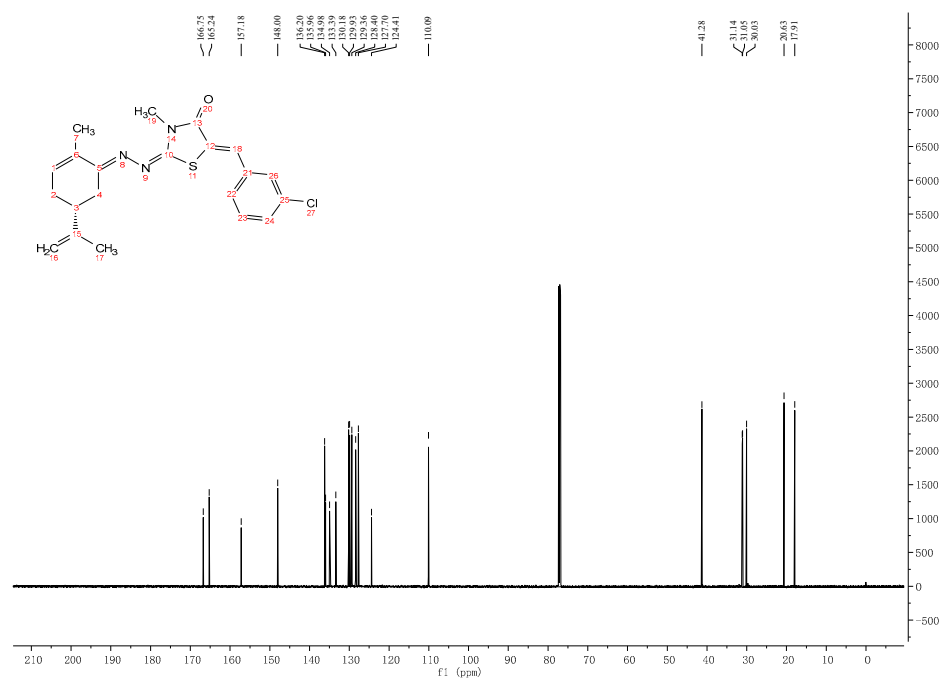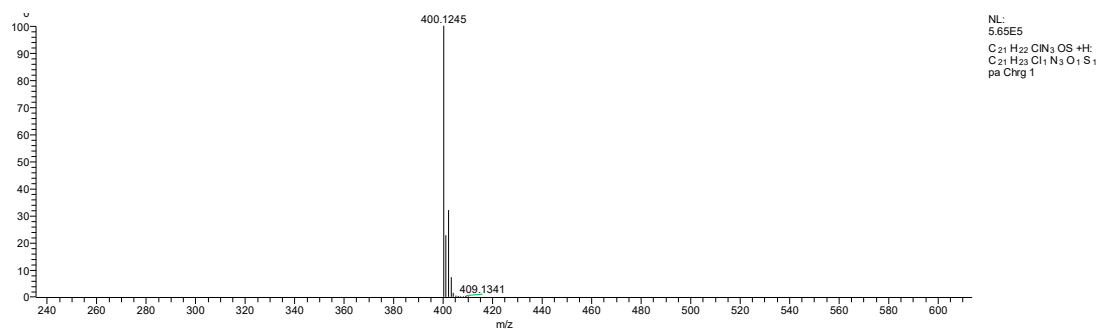

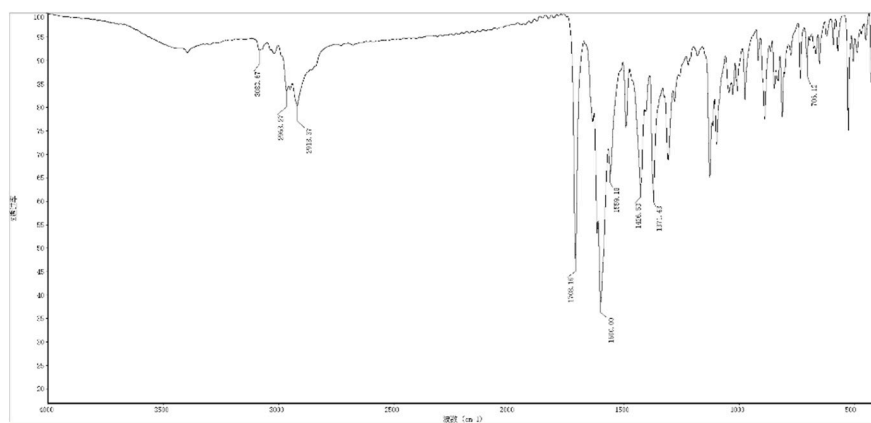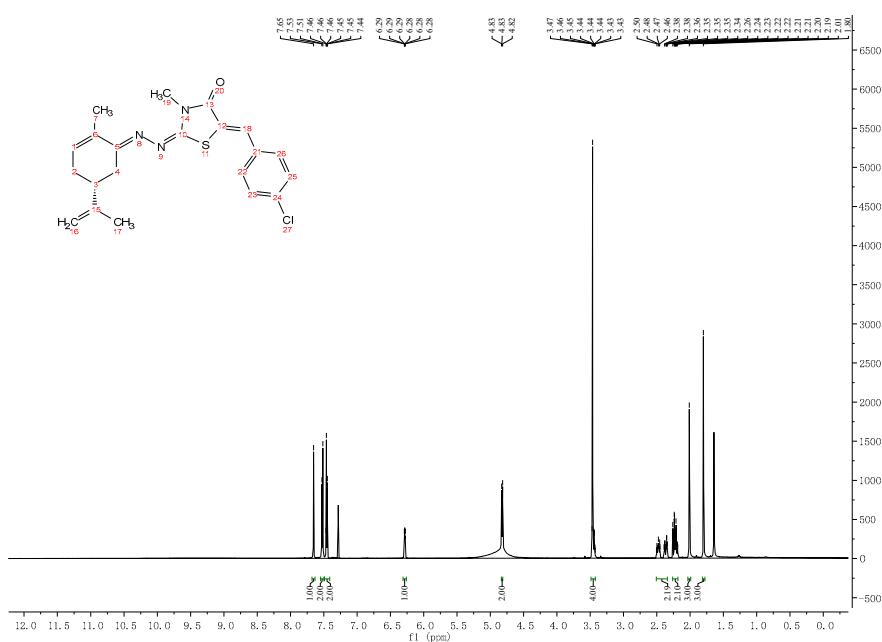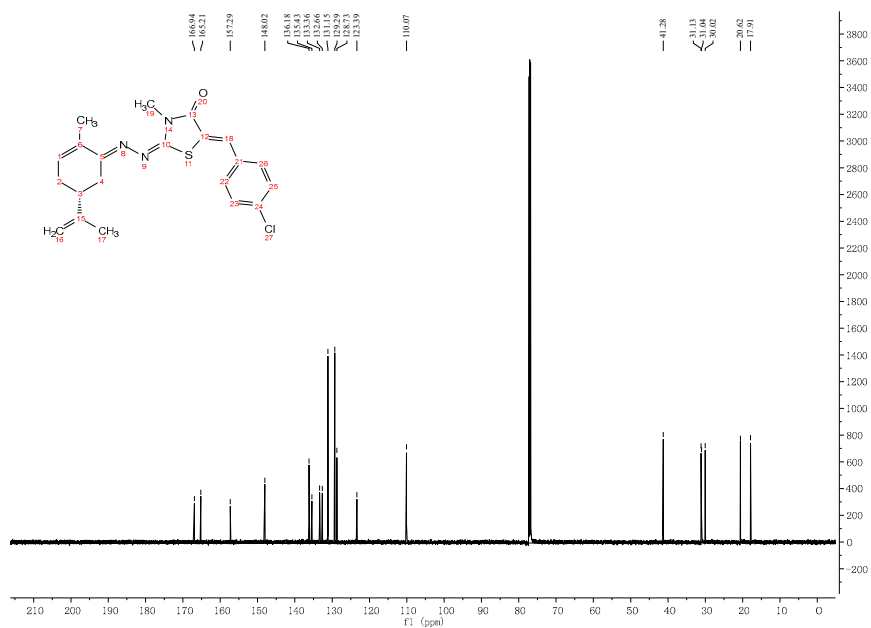

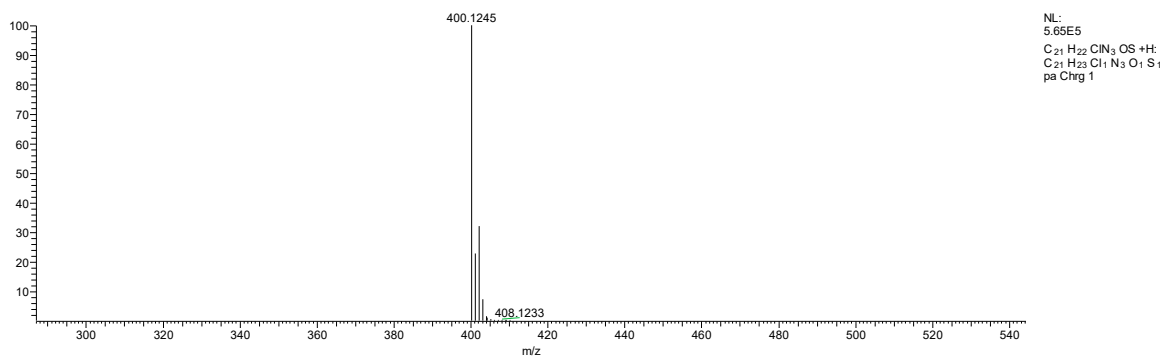

Figure S34 HRMS spectrum of compound **4g**.

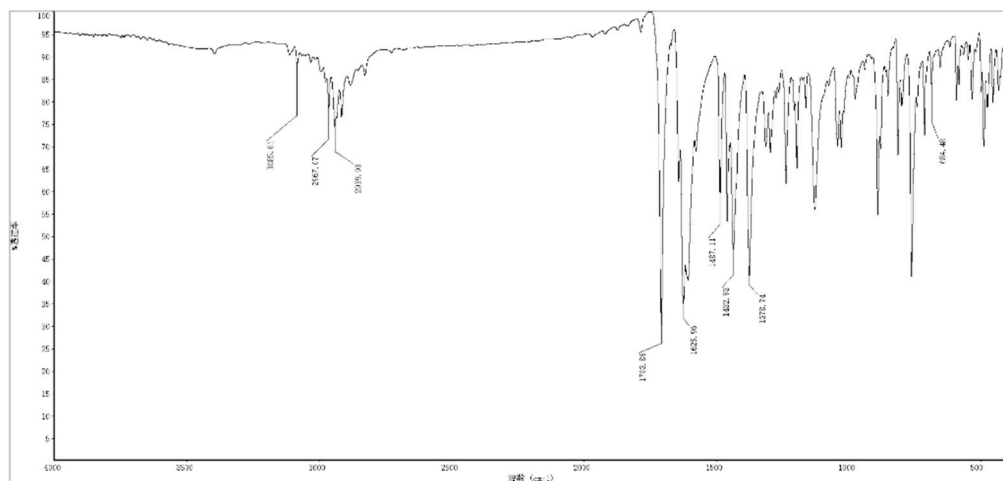

Figure S35 IR spectrum of compound **4h**.

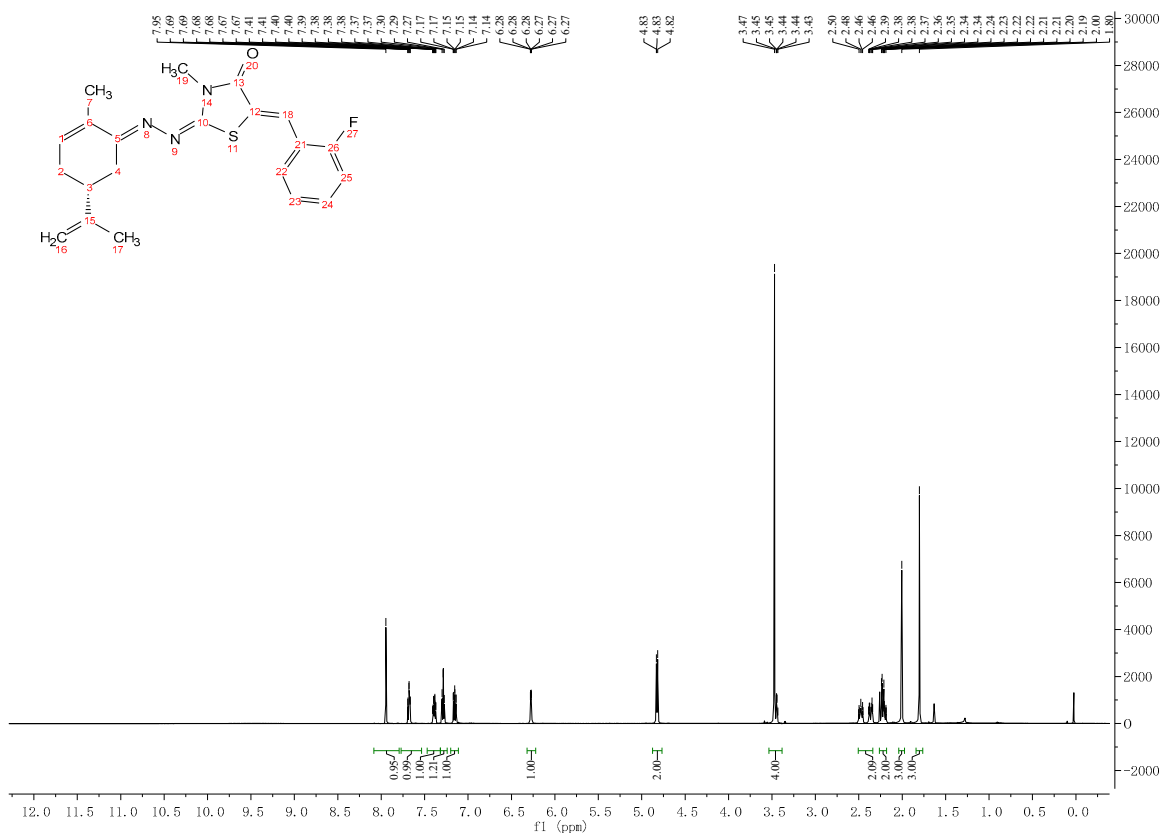

Figure S36 <sup>1</sup>H NMR spectrum of compound **4h**.

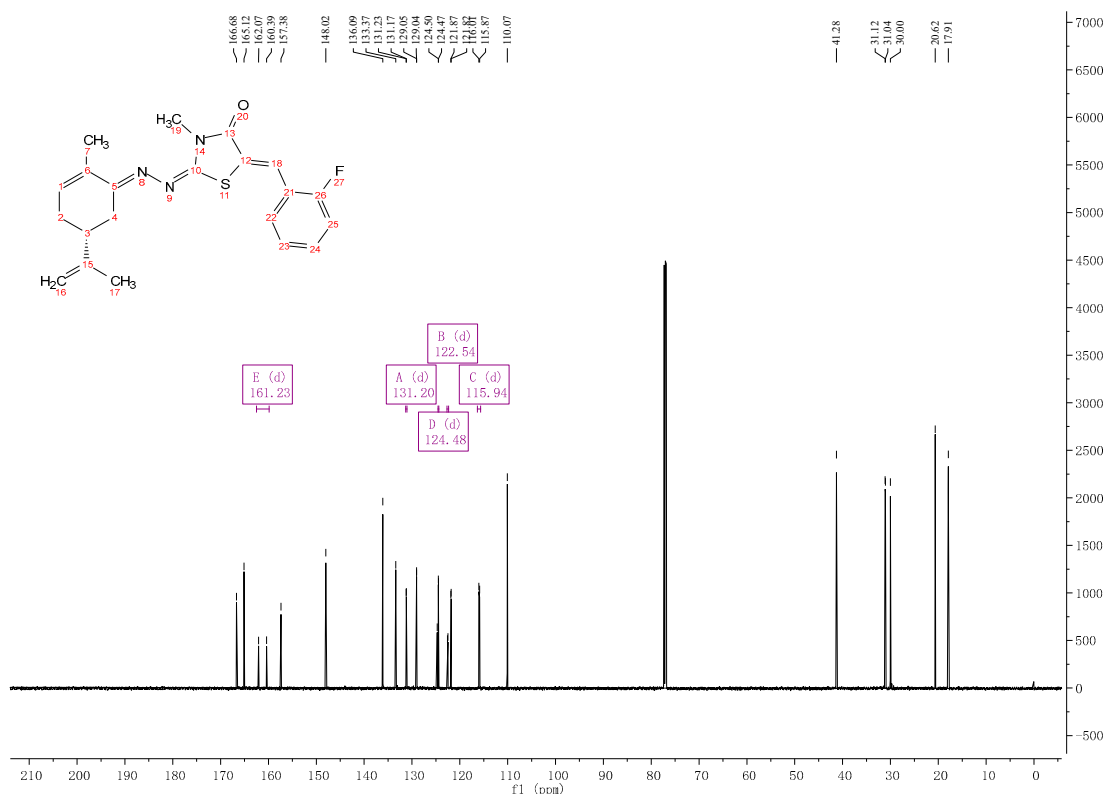

Figure S37  $^{13}\text{C}$  NMR spectrum of compound 4h.

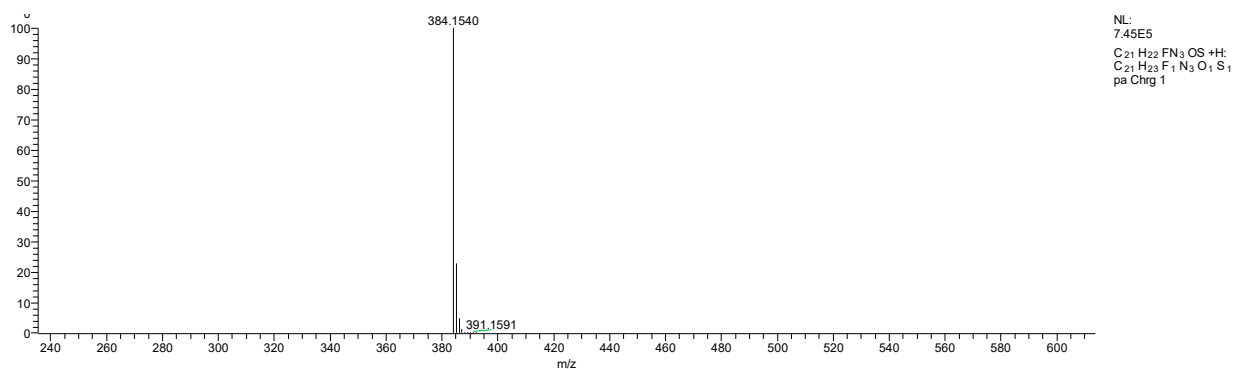

Figure S38 HRMS spectrum of compound 4h.

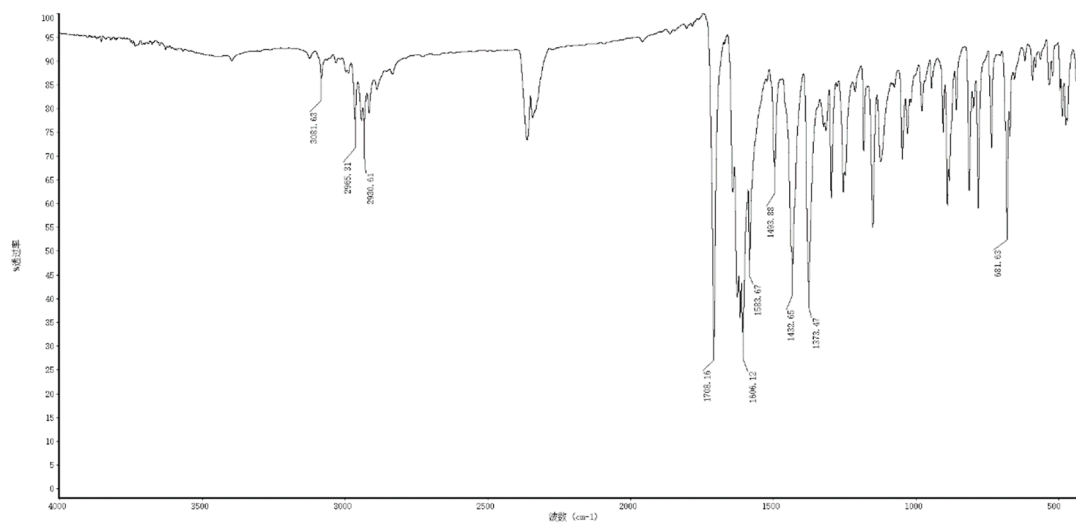

Figure S39 IR spectrum of compound 4i.

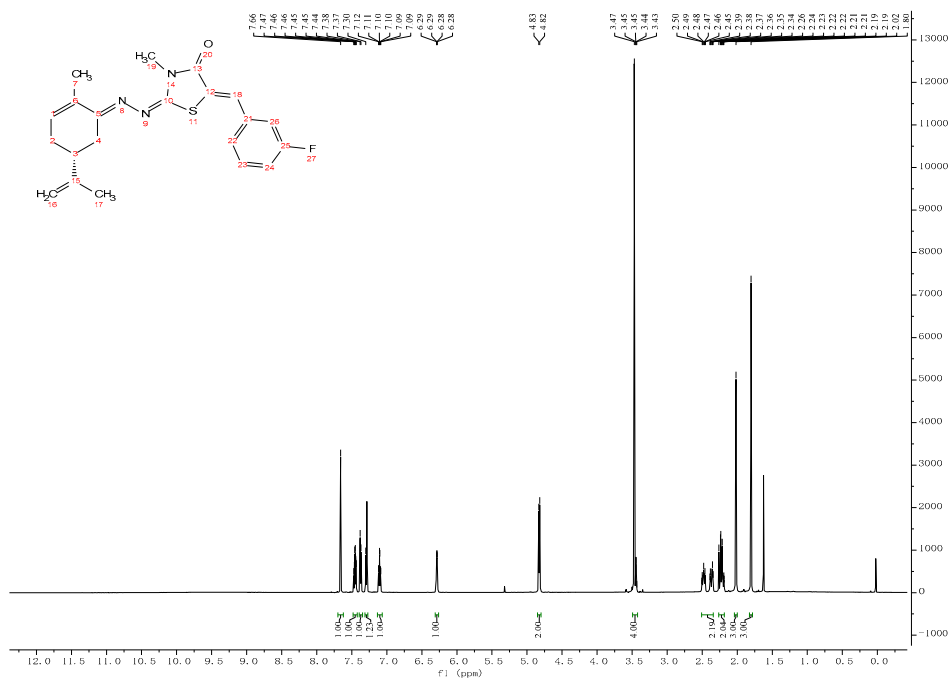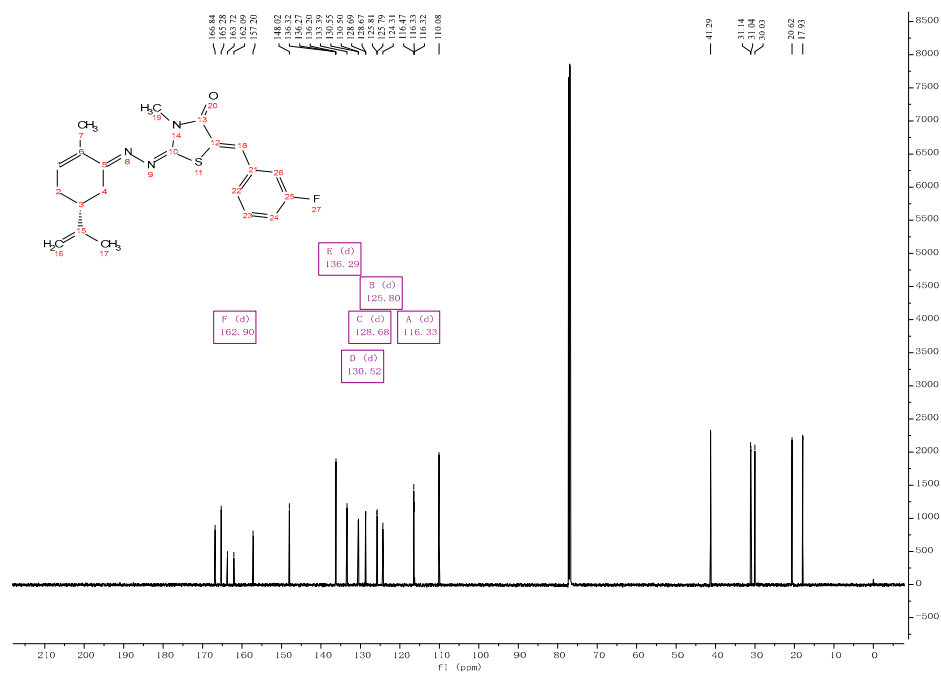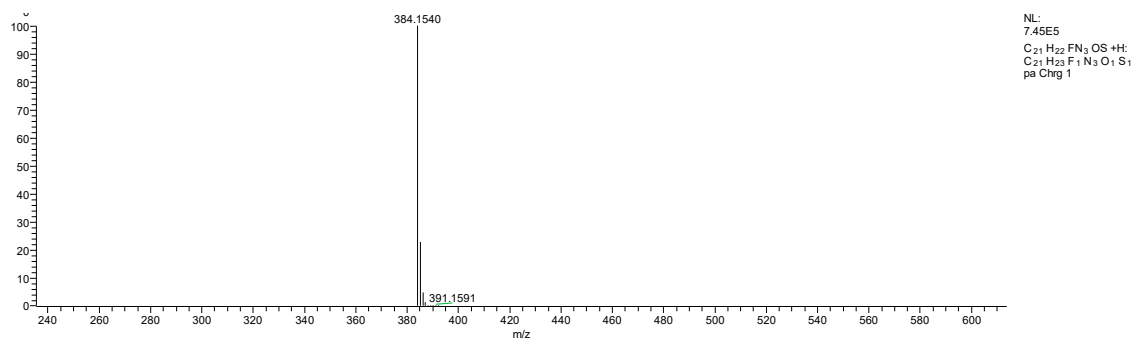





**Figure S45**  $^{13}\text{C}$  NMR spectrum of compound **4j**.

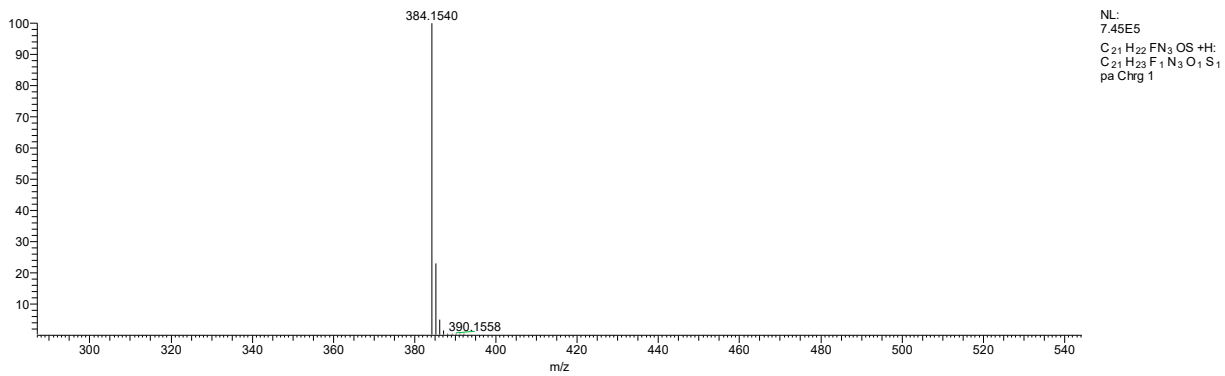

**Figure S46** HRMS spectrum of compound **4j**.

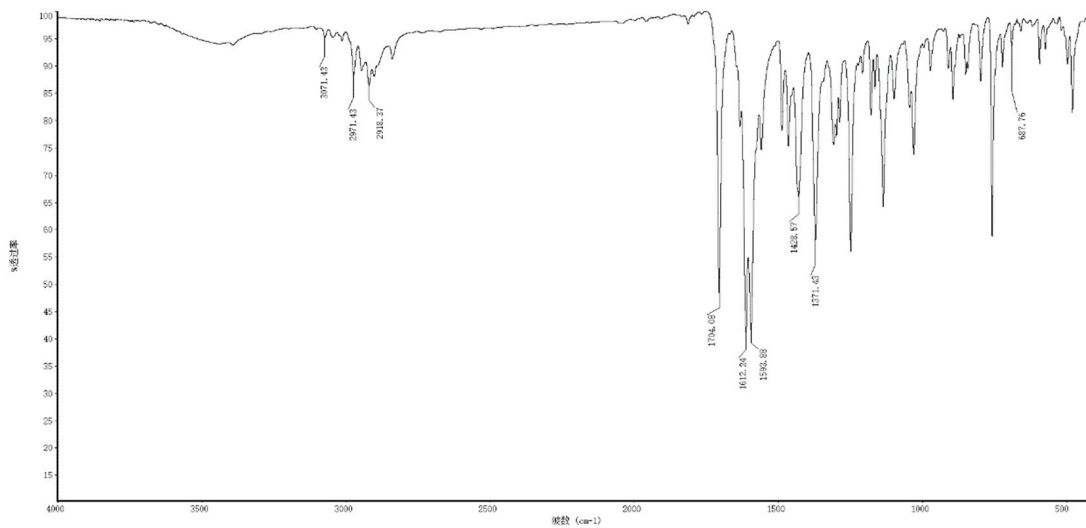

**Figure S47** IR spectrum of compound **4k**.

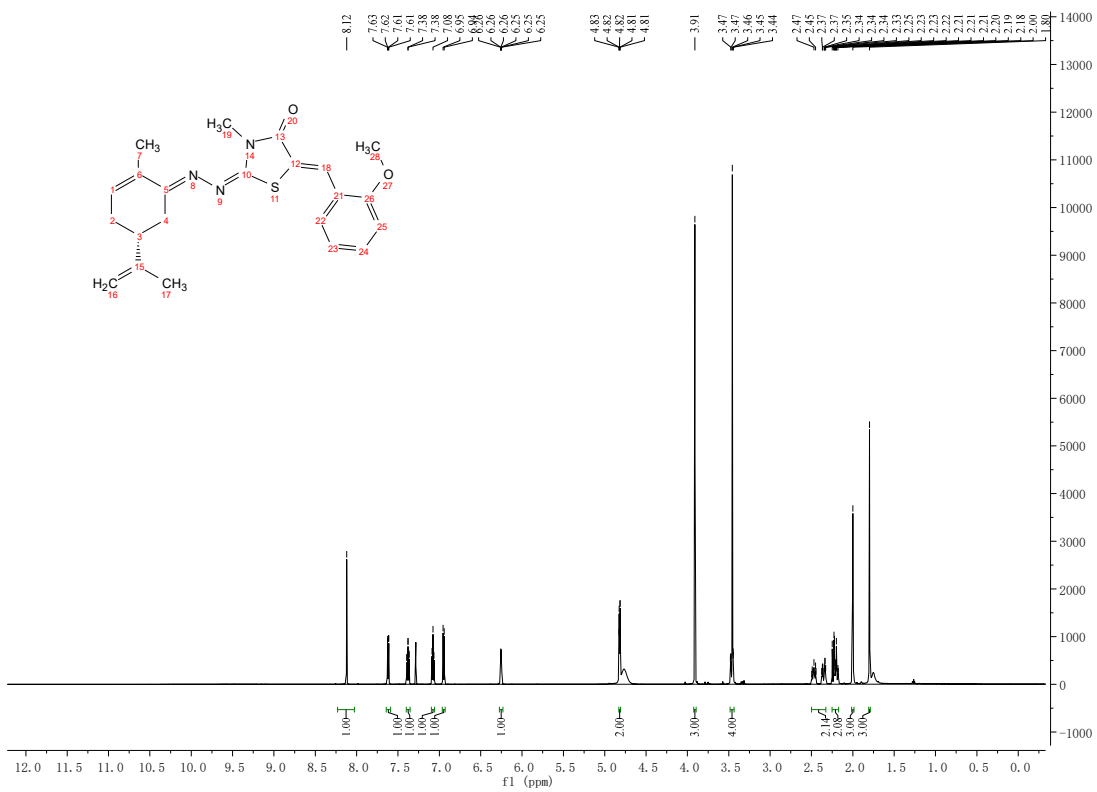

**Figure S48**  $^1\text{H}$  NMR spectrum of compound **4k**.

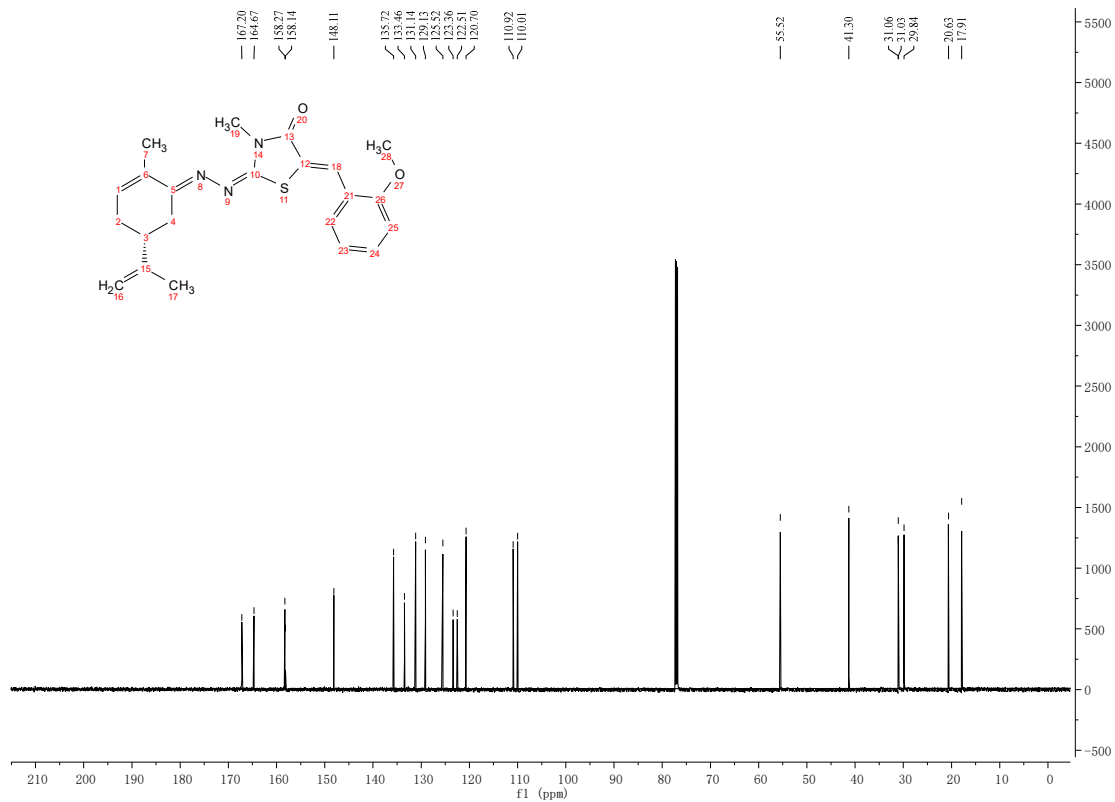

**Figure S49**  $^{13}\text{C}$  NMR spectrum of compound **4k**.

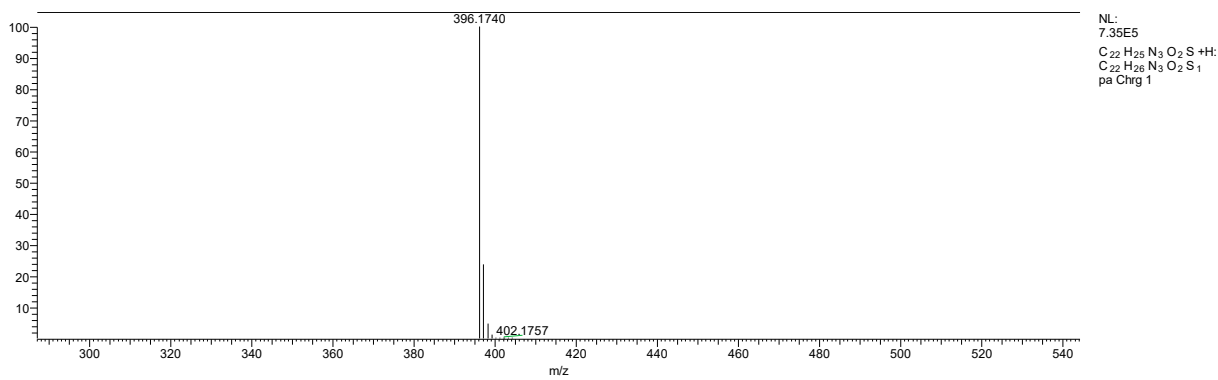

**Figure S50** HRMS spectrum of compound **4k**.

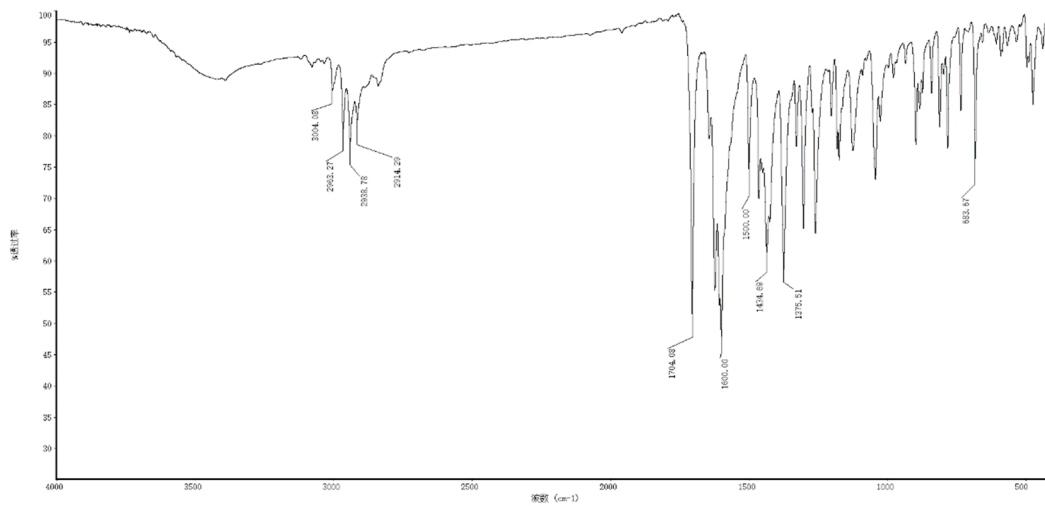

**Figure S51** IR spectrum of compound **4l**.

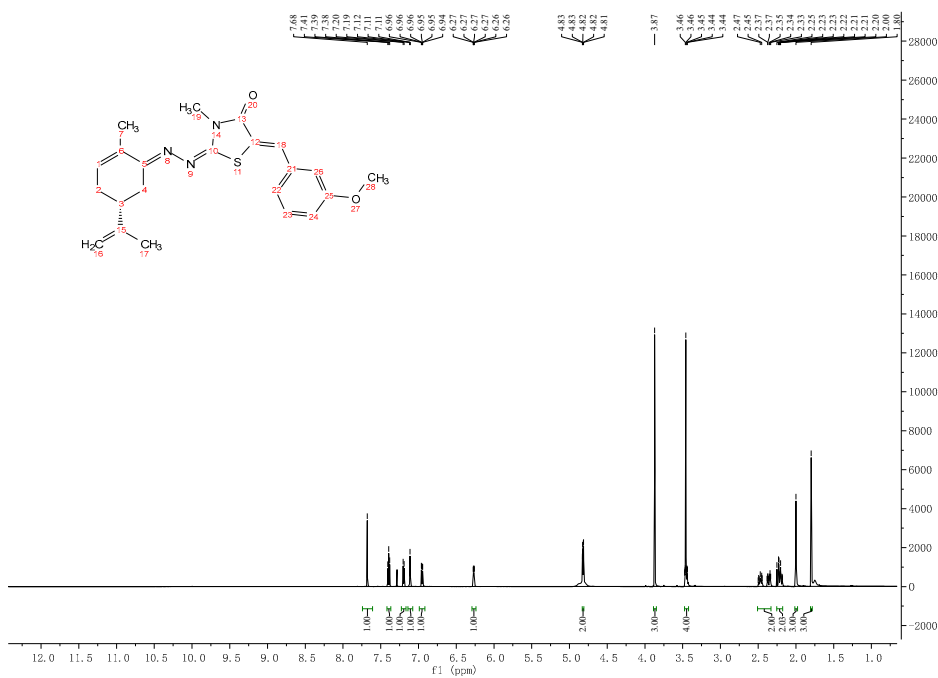

**Figure S52**  $^1\text{H}$  NMR spectrum of compound **4l**.

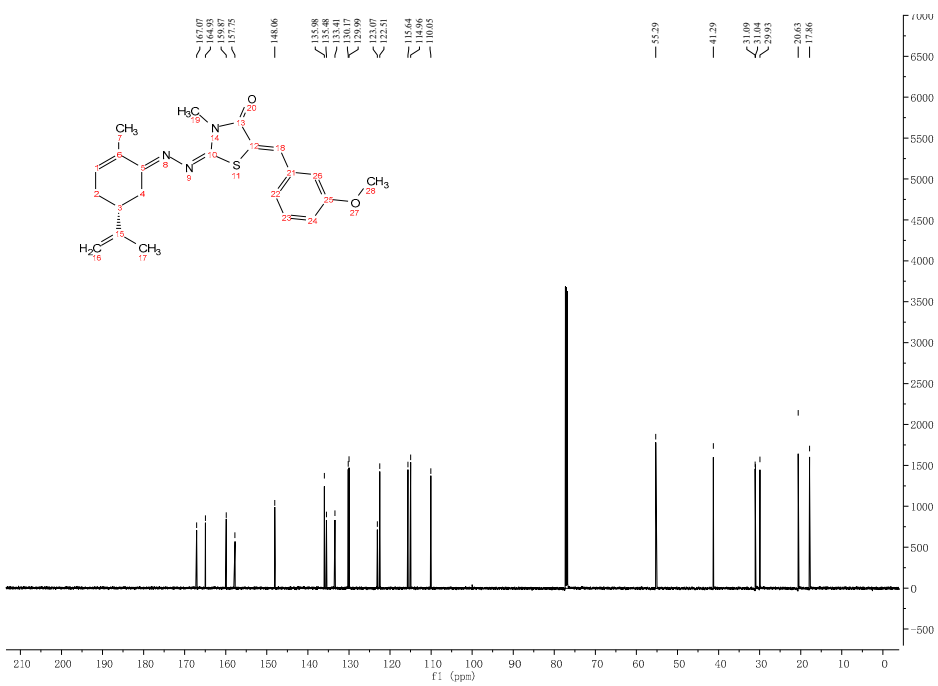

**Figure S53**  $^{13}\text{C}$  NMR spectrum of compound **4l**.

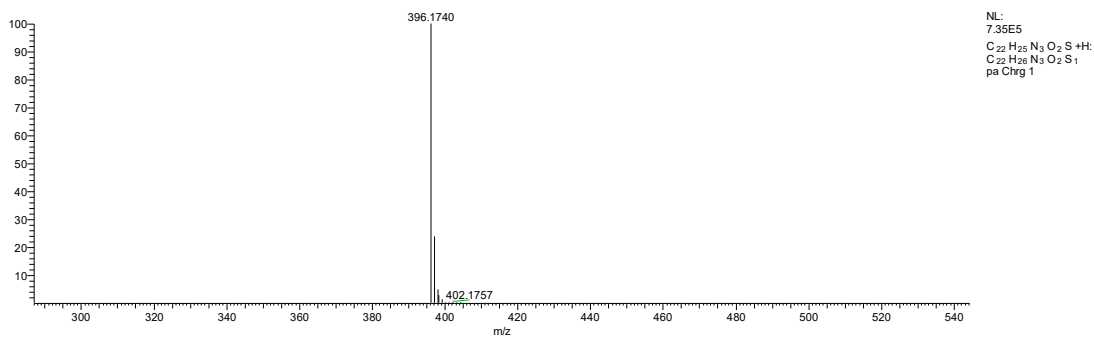

**Figure S54** HRMS spectrum of compound **4l**.

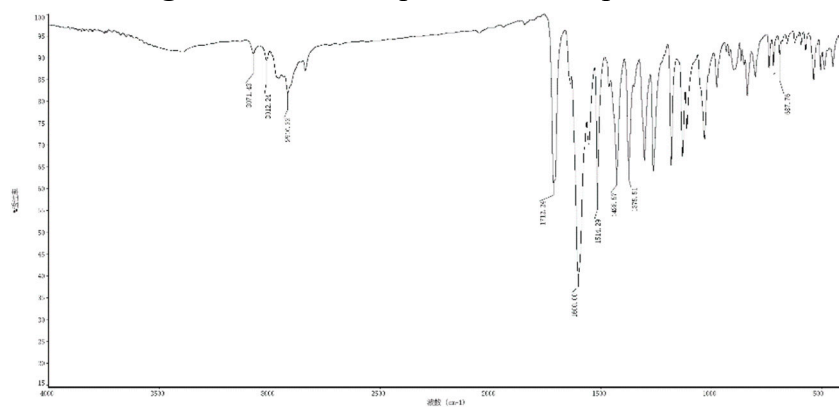

**Figure S55** IR spectrum of compound **4m**.

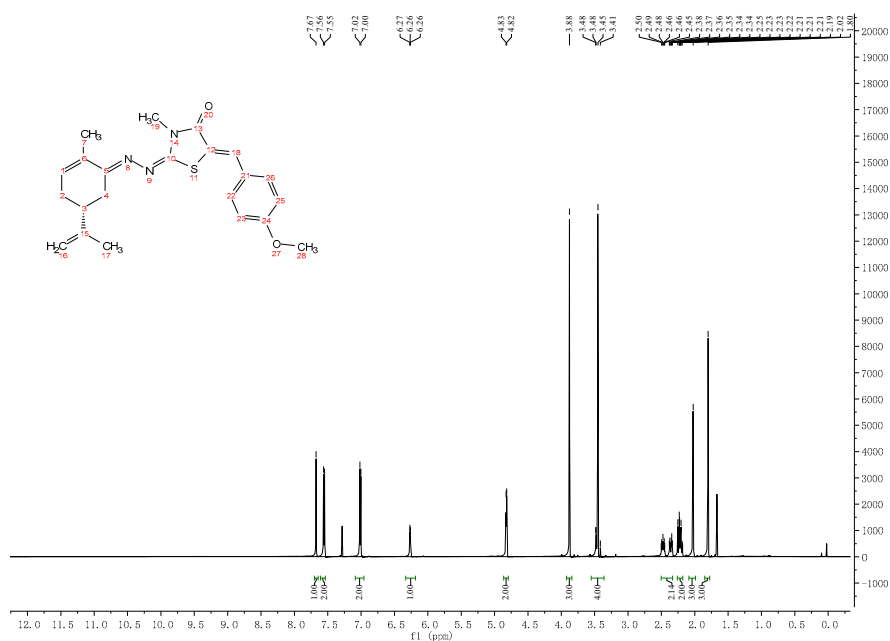

**Figure S56**  $^1\text{H}$  NMR spectrum of compound **4m**.

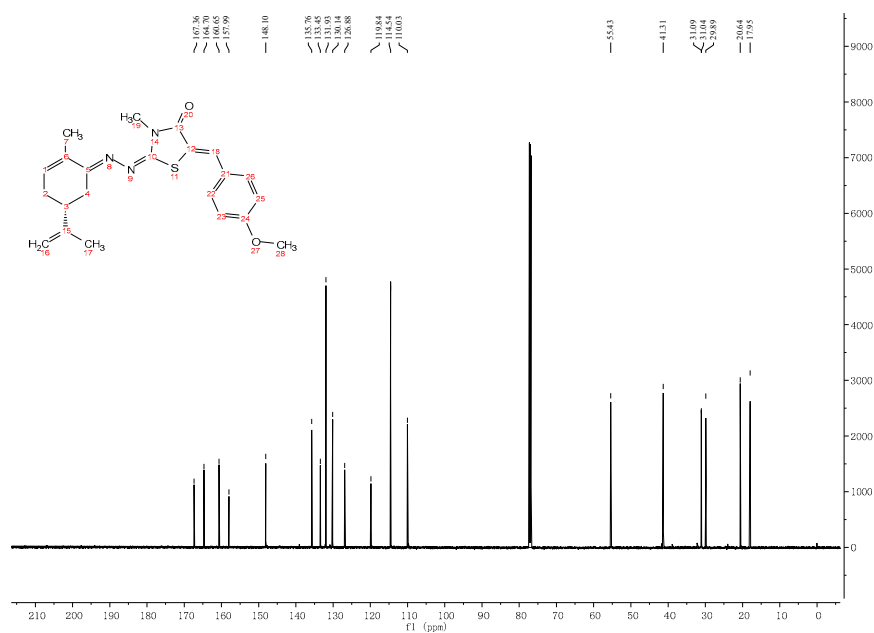

Figure S57  $^{13}\text{C}$  NMR spectrum of compound **4m**.

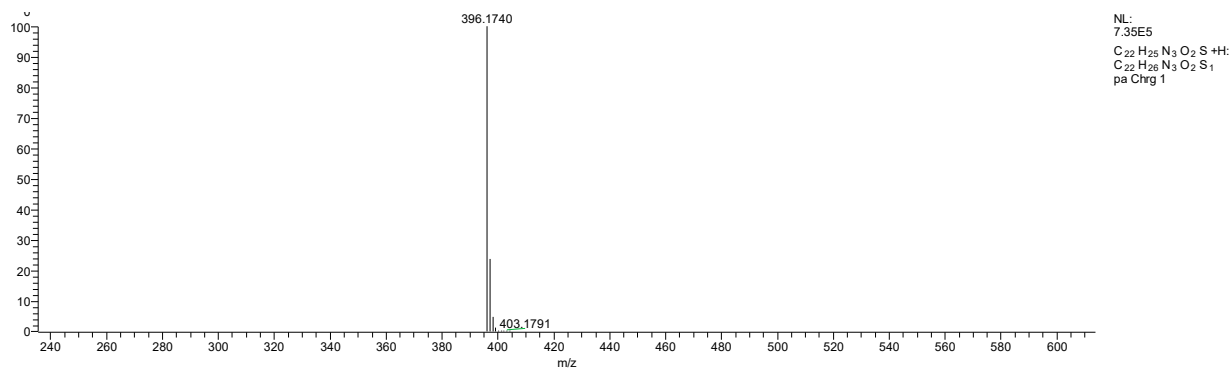

Figure S58 HRMS spectrum of compound **4m**.

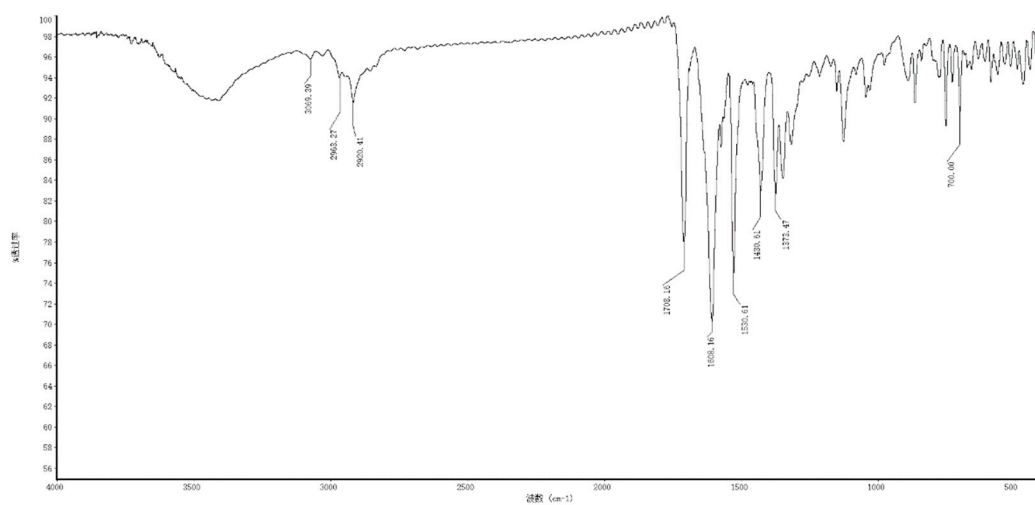

Figure S59 IR spectrum of compound **4n**.

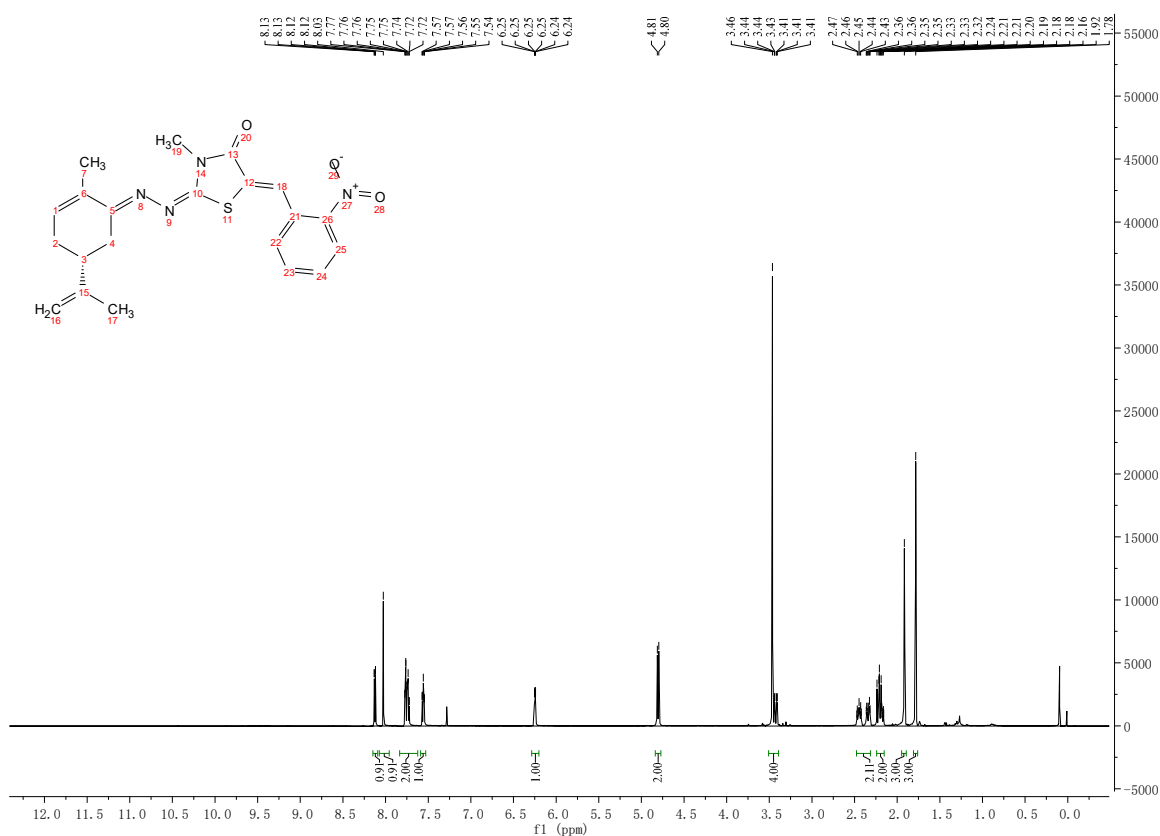

**Figure S60**  $^1\text{H}$  NMR spectrum of compound **4n**.

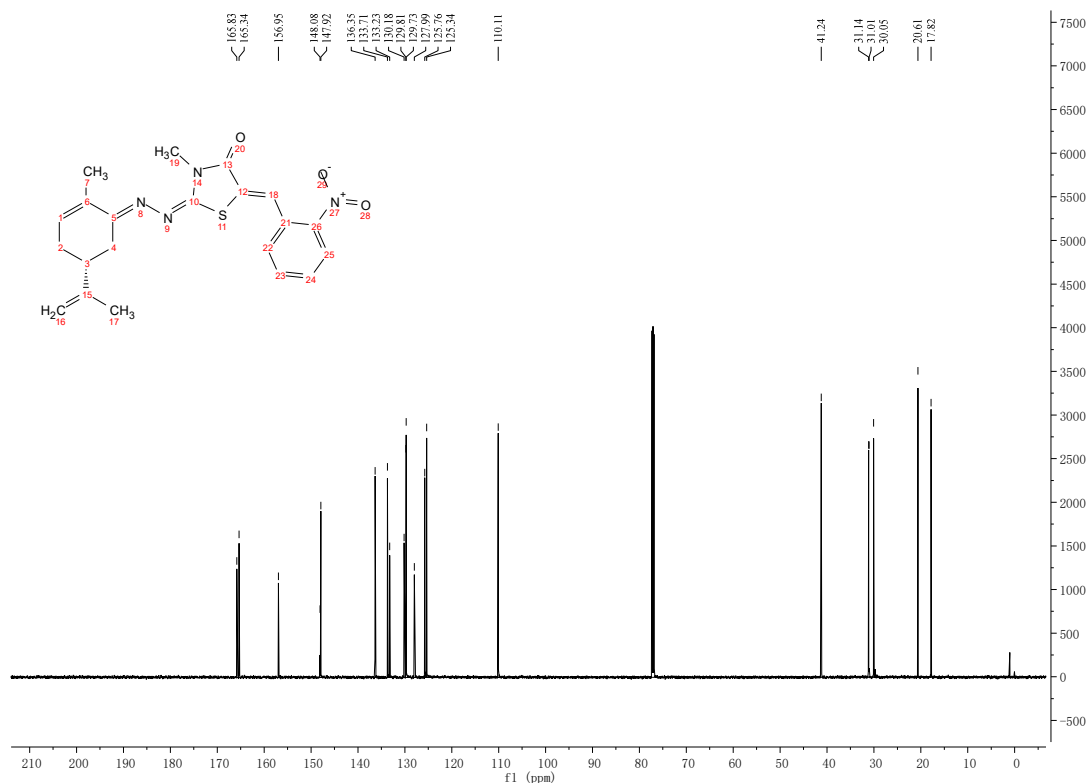

**Figure S61**  $^{13}\text{C}$  NMR spectrum of compound **4n**.

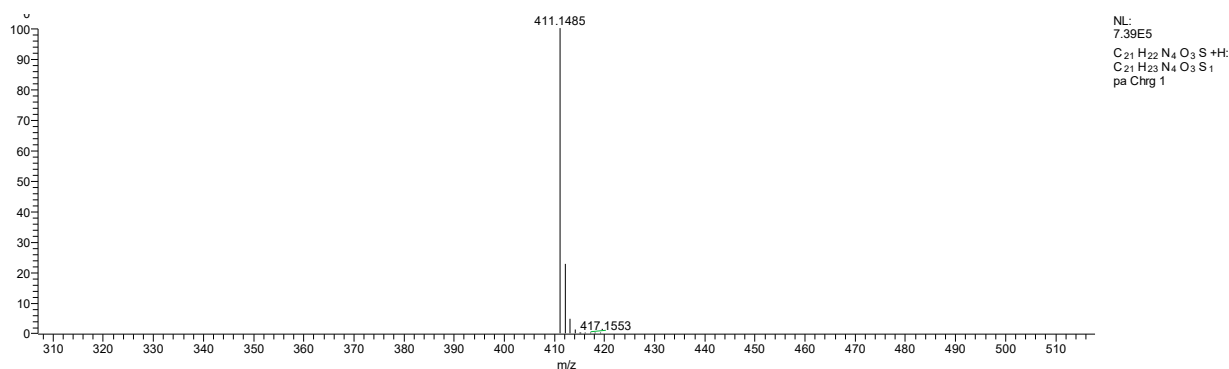

**Figure S62** HRMS spectrum of compound **4n**.

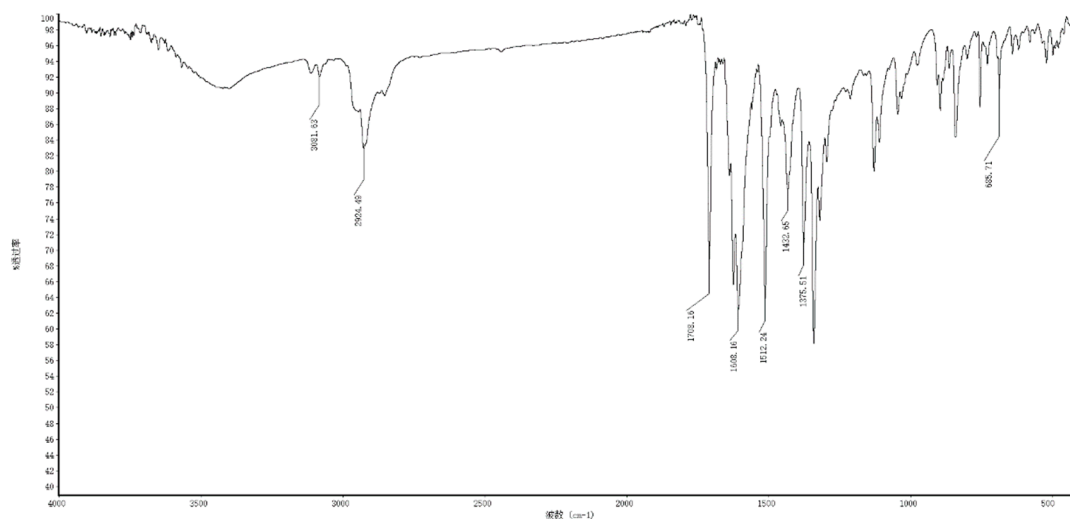

**Figure S63** IR spectrum of compound **4o**.

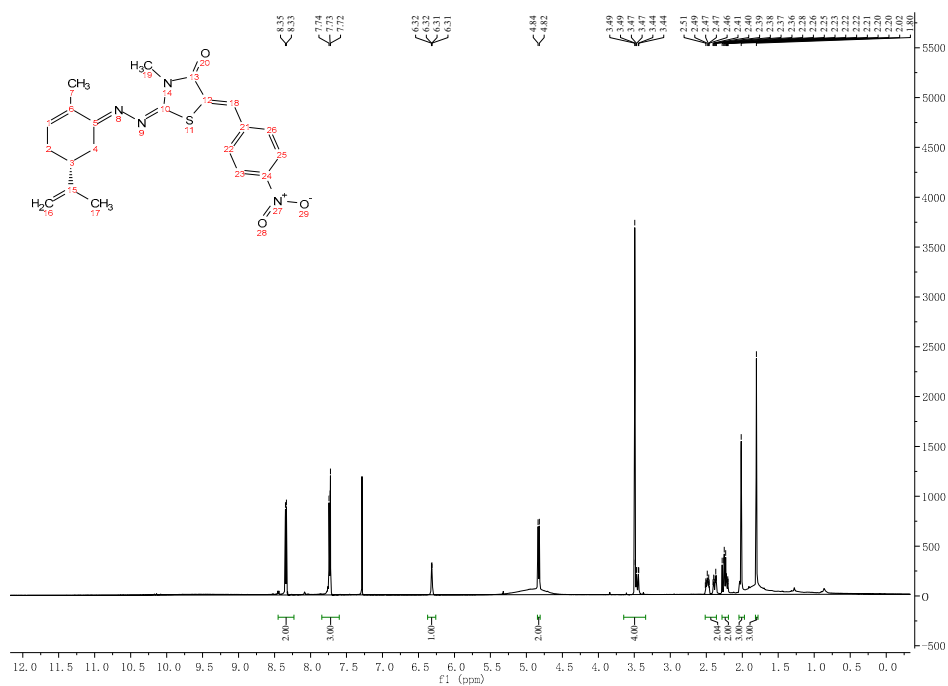

**Figure S64**  $^1\text{H}$  NMR spectrum of compound **40**.

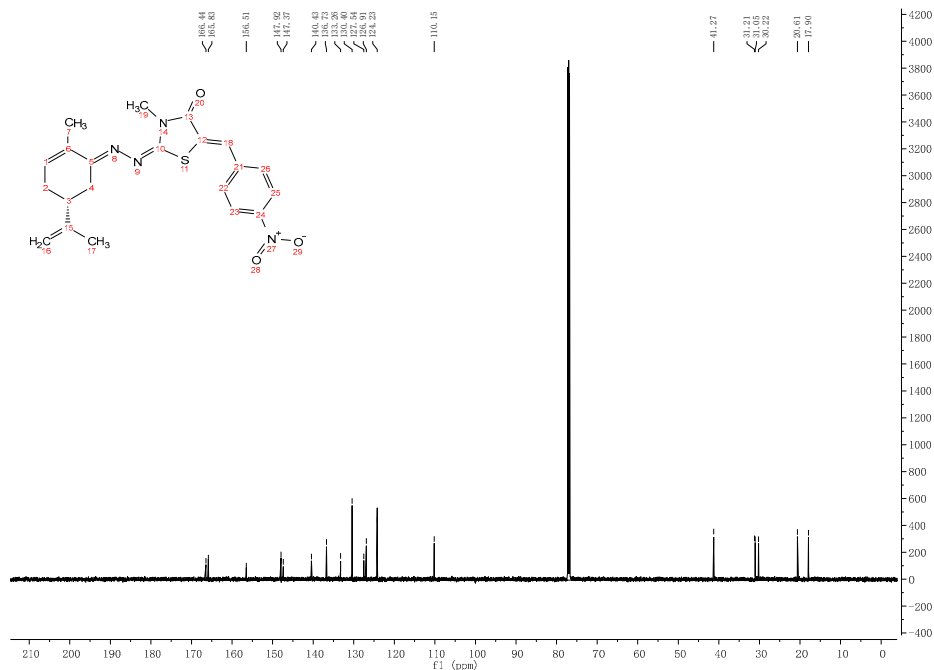

**Figure S65**  $^{13}\text{C}$  NMR spectrum of compound **4o**.

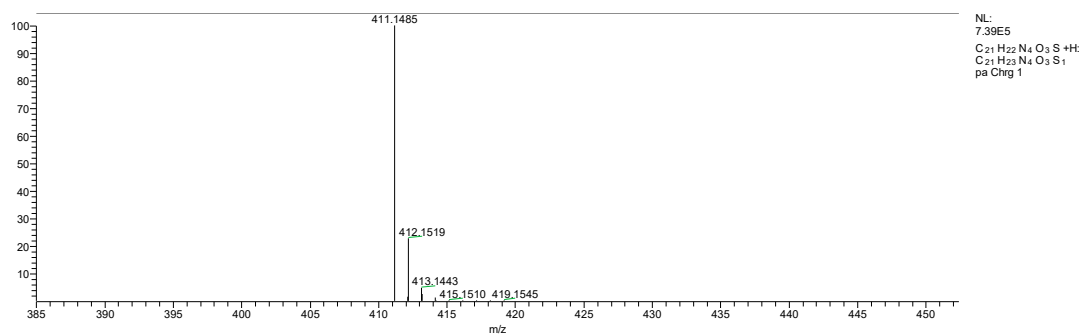



**Figure S66 HRMS spectrum of compound 4o.**

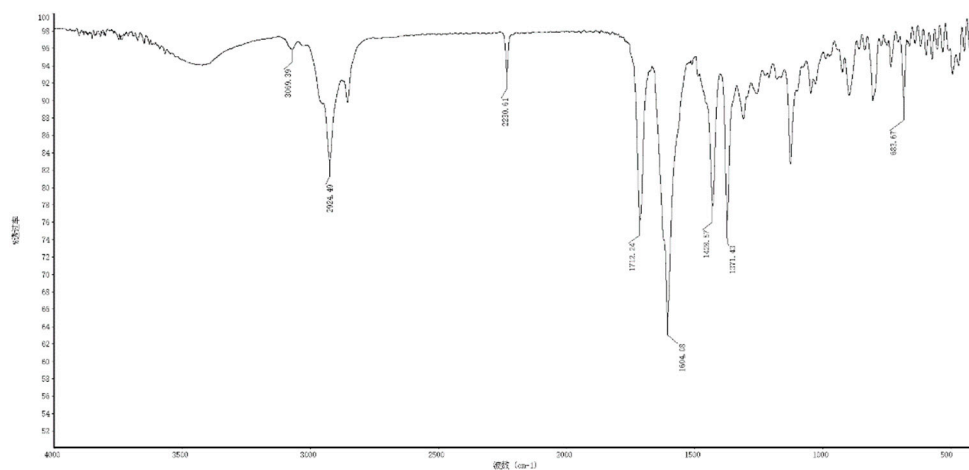

**Figure S67 IR spectrum of compound 4p.**

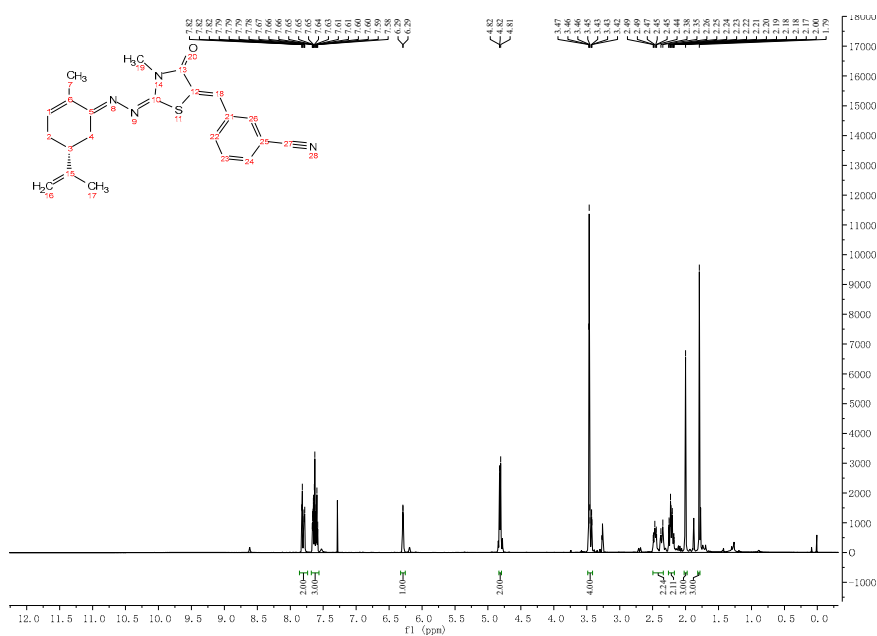

**Figure S68 <sup>1</sup>H NMR spectrum of compound 4p.**

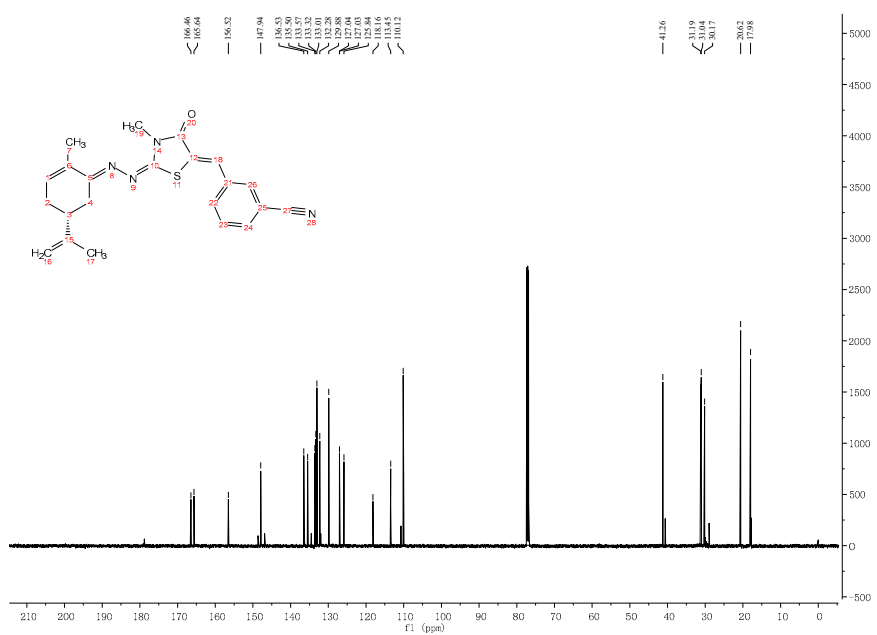

Figure S69  $^{13}\text{C}$  NMR spectrum of compound 4p.

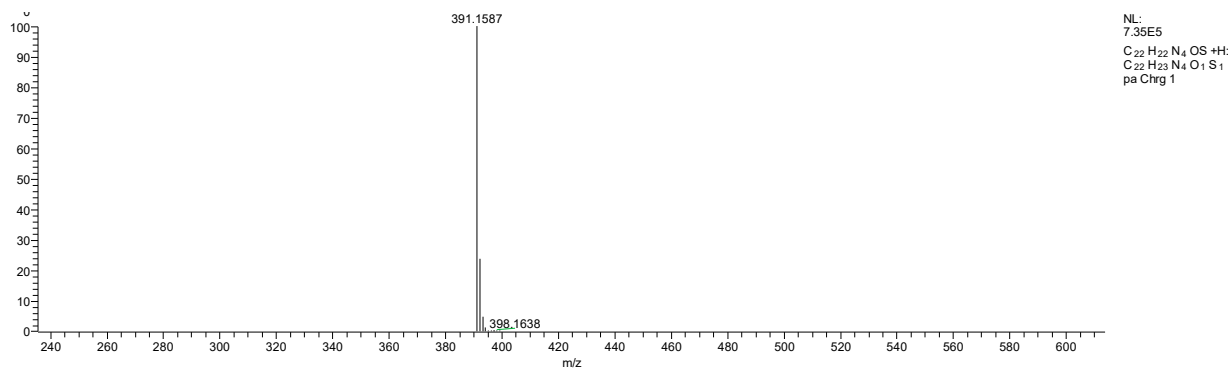

Figure S70 HRMS spectrum of compound 4p.

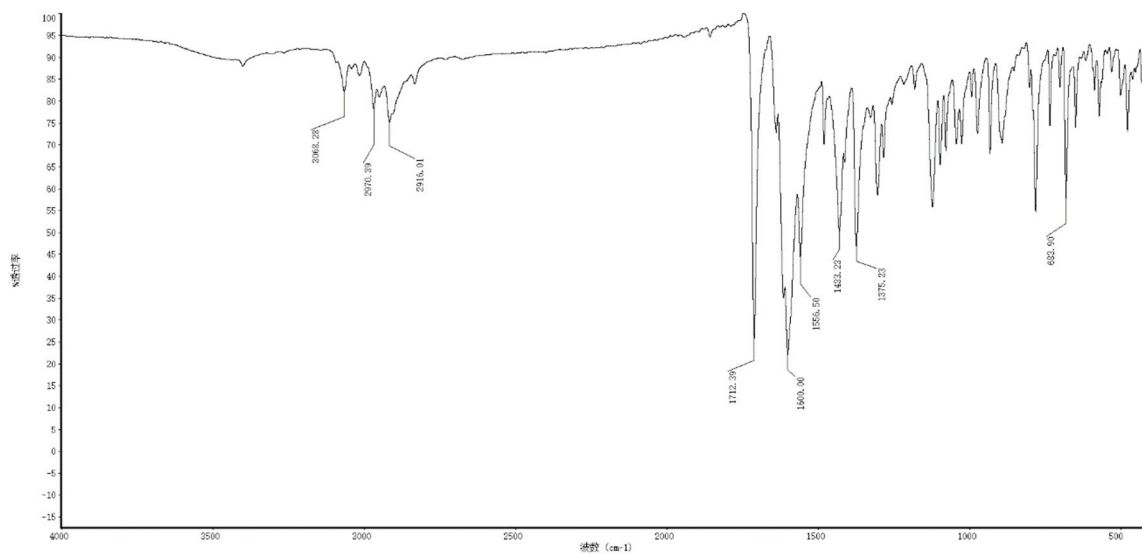

Figure S71 IR spectrum of compound 4q.

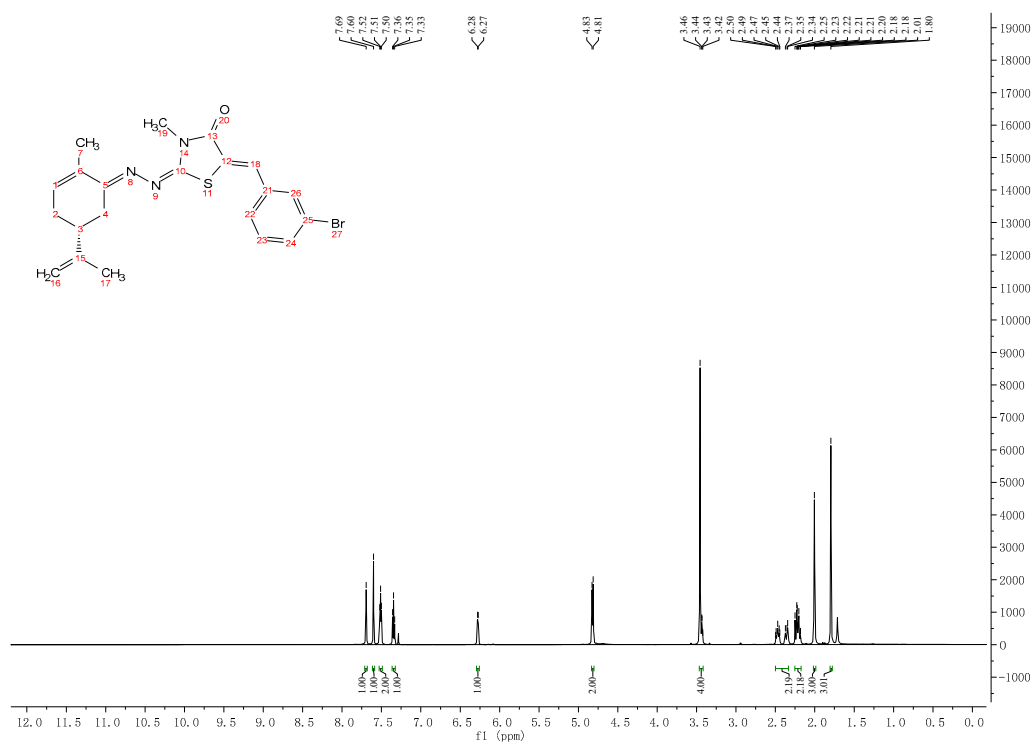

Figure S72  $^1\text{H}$  NMR spectrum of compound **4q**.

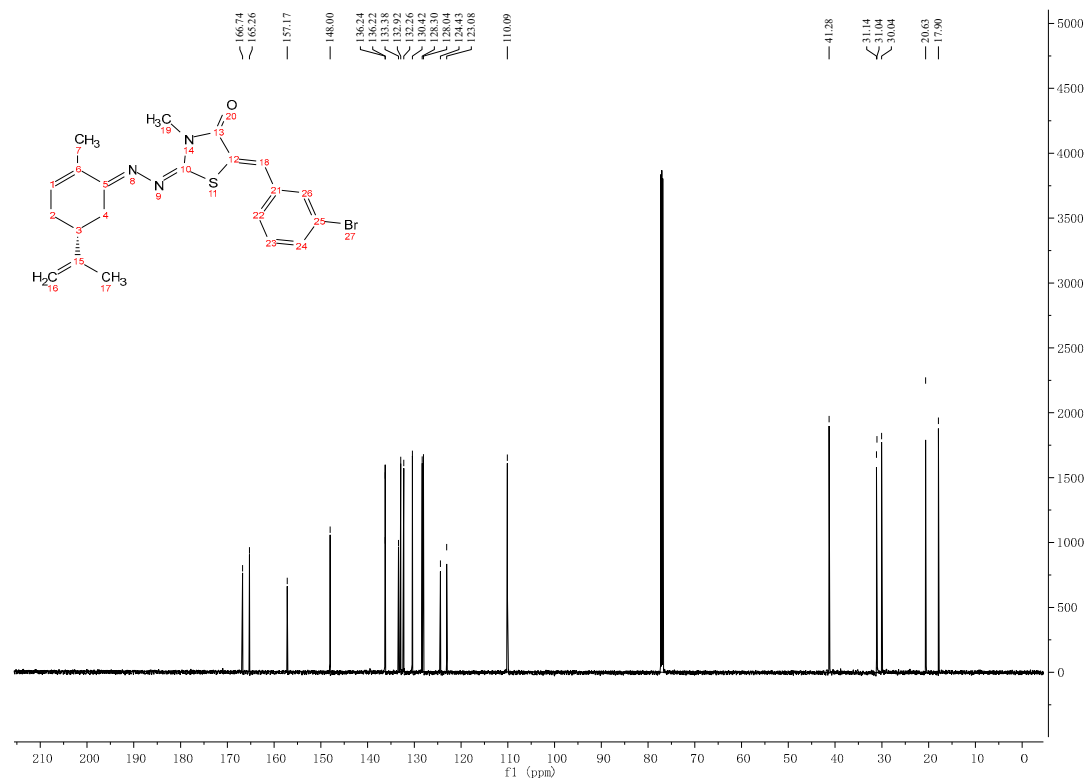

Figure S73  $^{13}\text{C}$  NMR spectrum of compound **4q**.

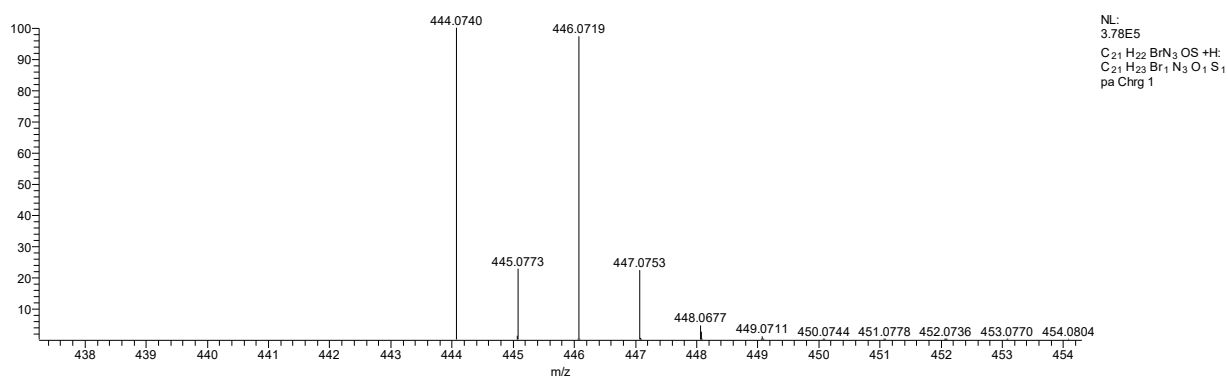

Figure S74 HRMS spectrum of compound **4q**.

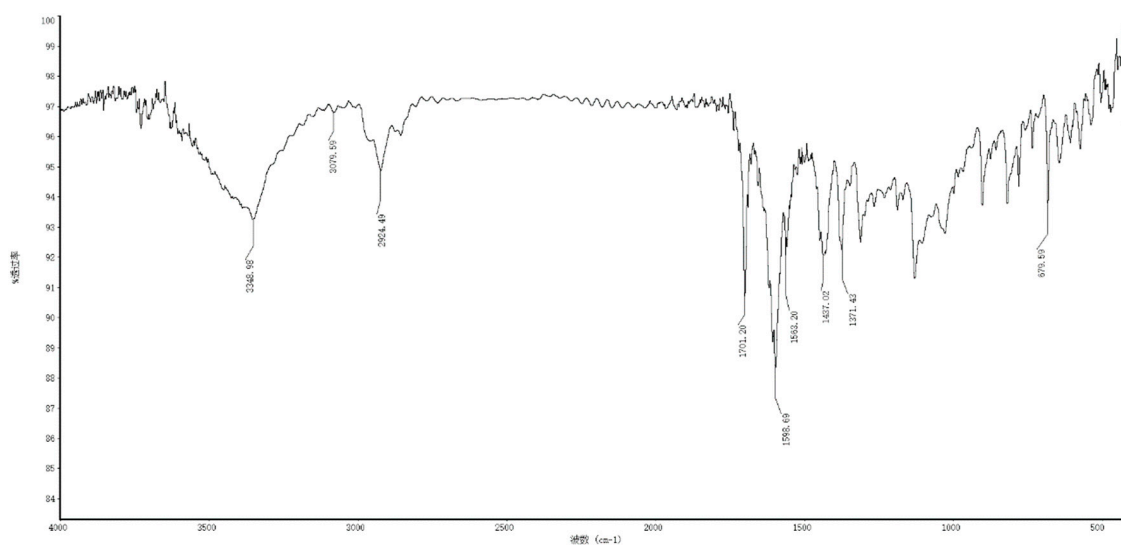

Figure S75 IR spectrum of compound 4r.

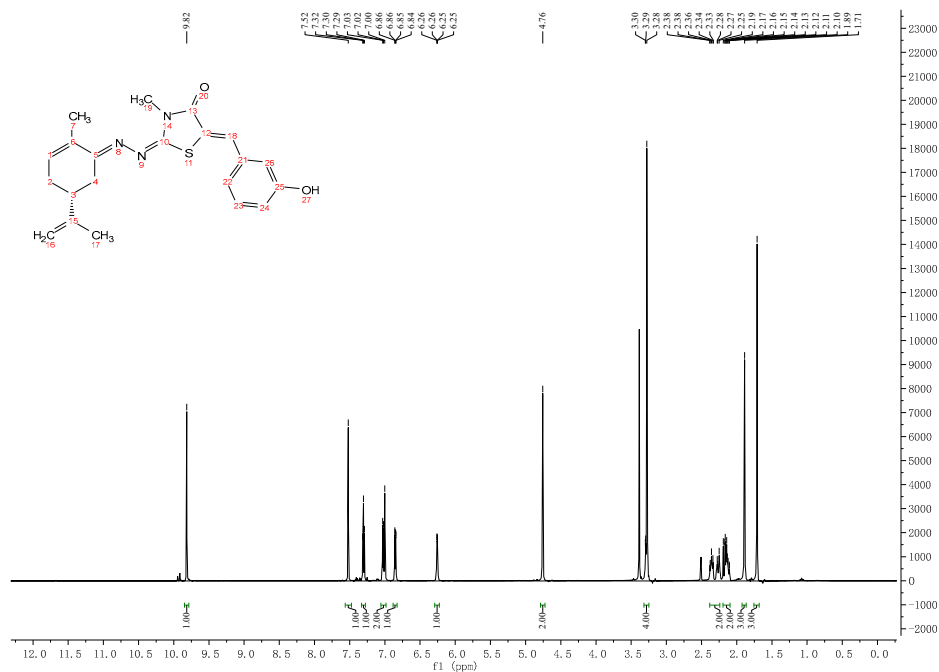

Figure S76 <sup>1</sup>H NMR spectrum of compound 4r.

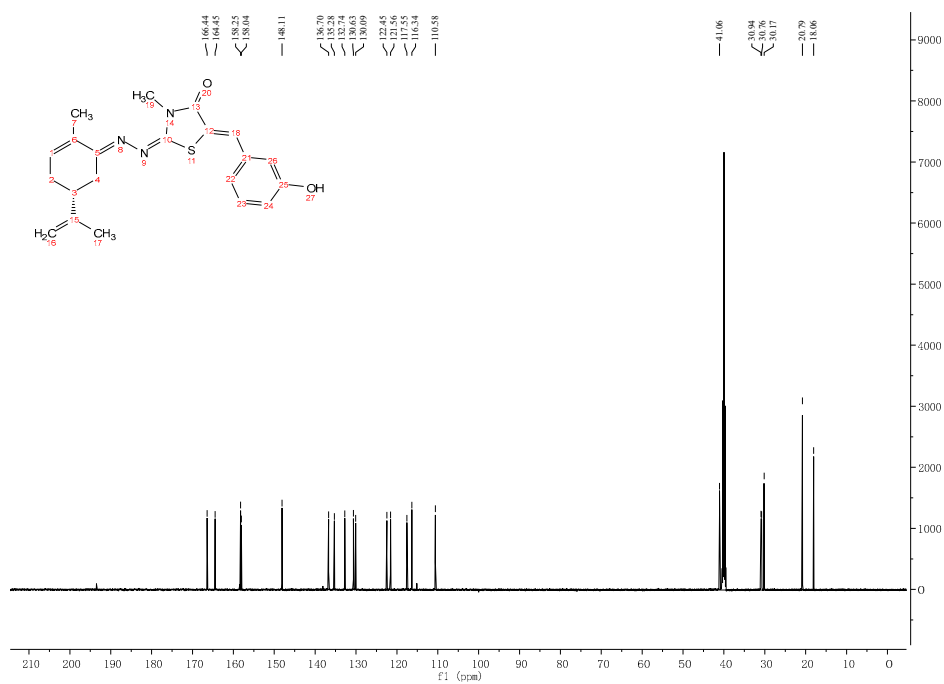

Figure S77 <sup>13</sup>C NMR spectrum of compound 4r.

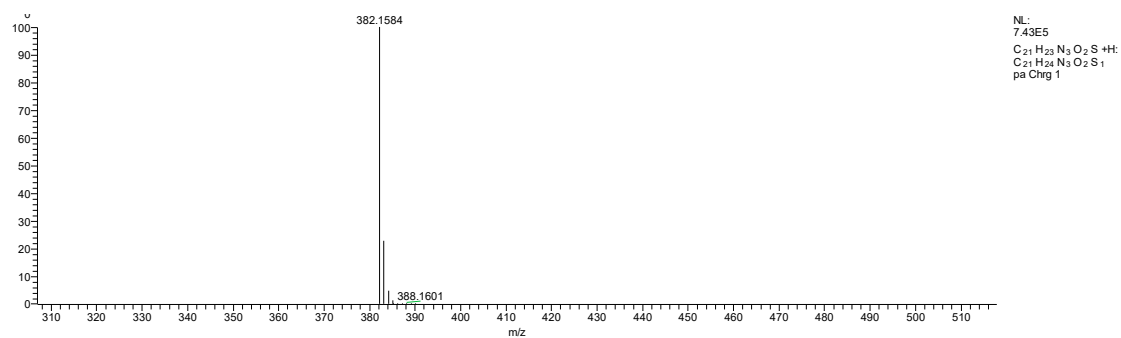

**Figure S78** HRMS spectrum of compound **4r**.

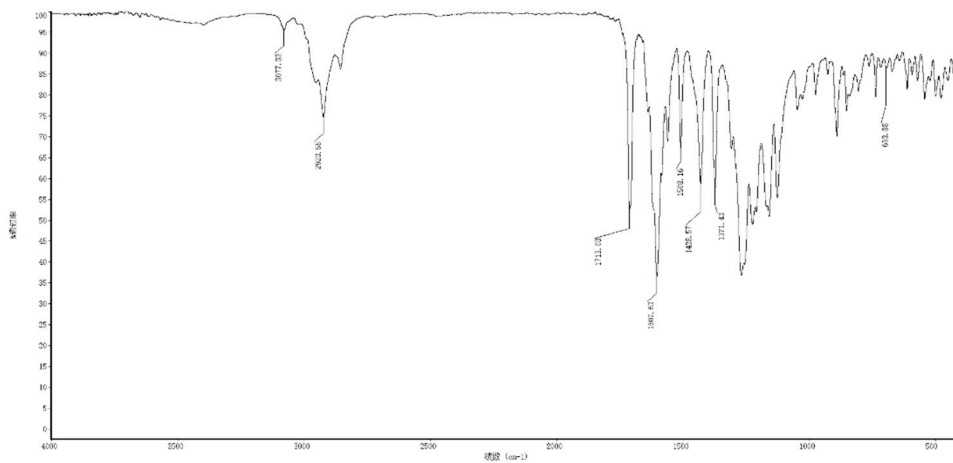

**Figure S79** IR spectrum of compound **4s**.

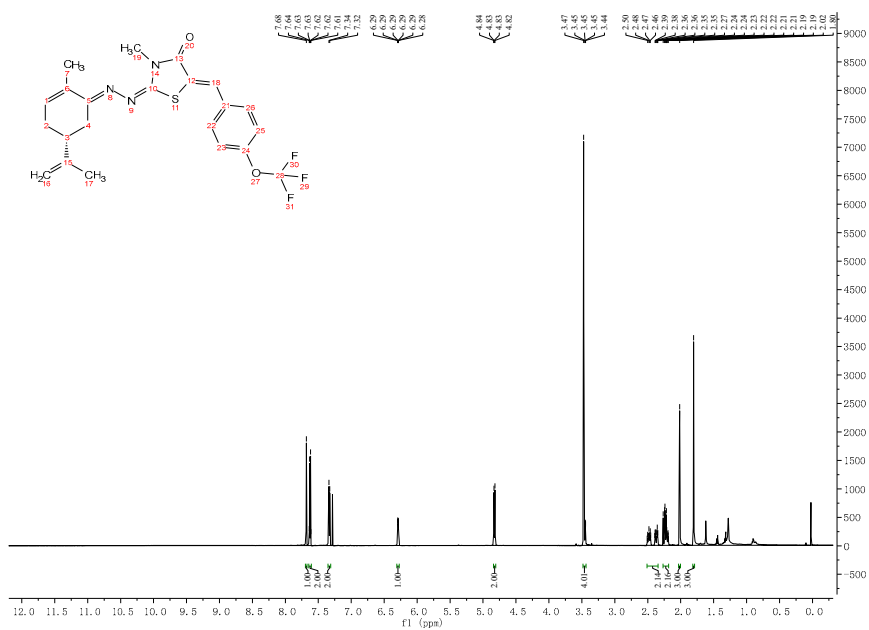

**Figure S80**  $^1\text{H}$  NMR spectrum of compound **4s**.

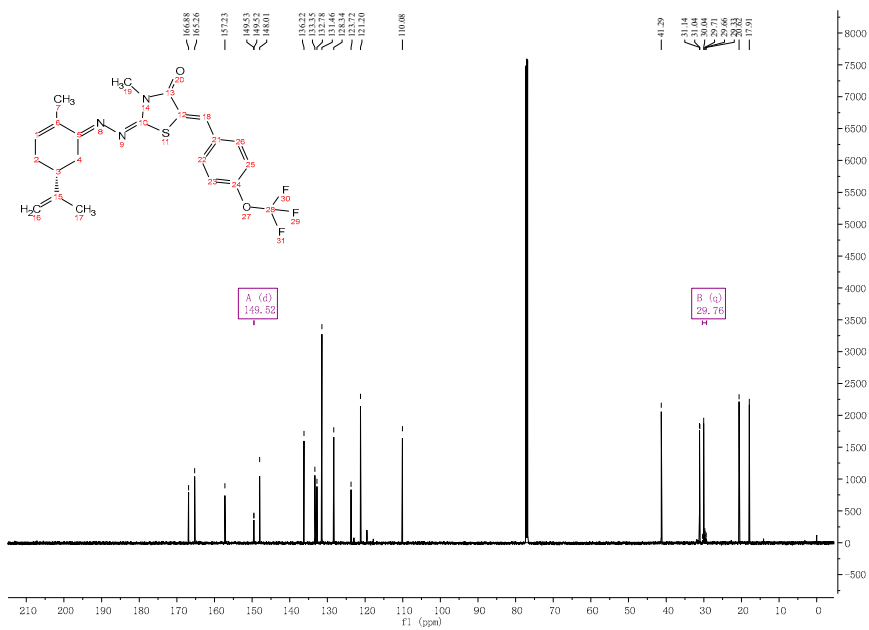

**Figure S81**  $^{13}\text{C}$  NMR spectrum of compound **4s**.

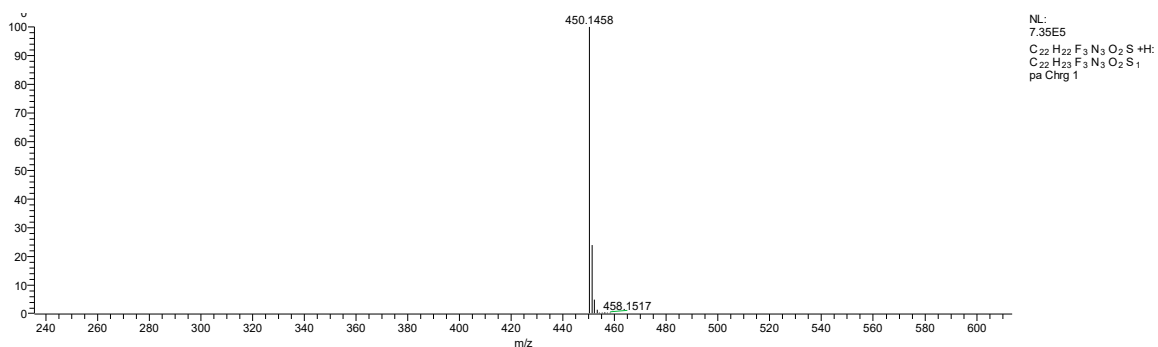

**Figure S82** HRMS spectrum of compound **4s**.

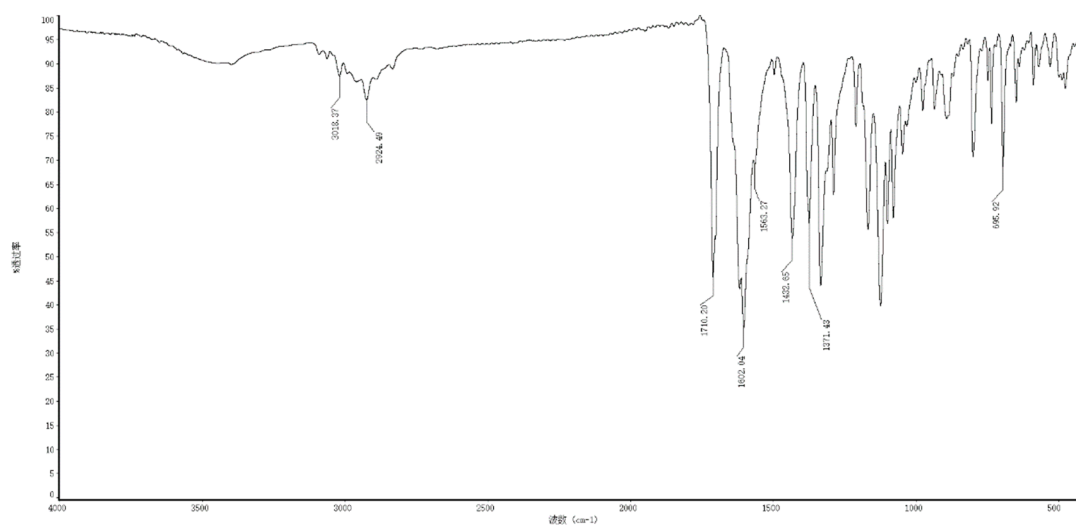

**Figure S83** IR spectrum of compound **4t**.

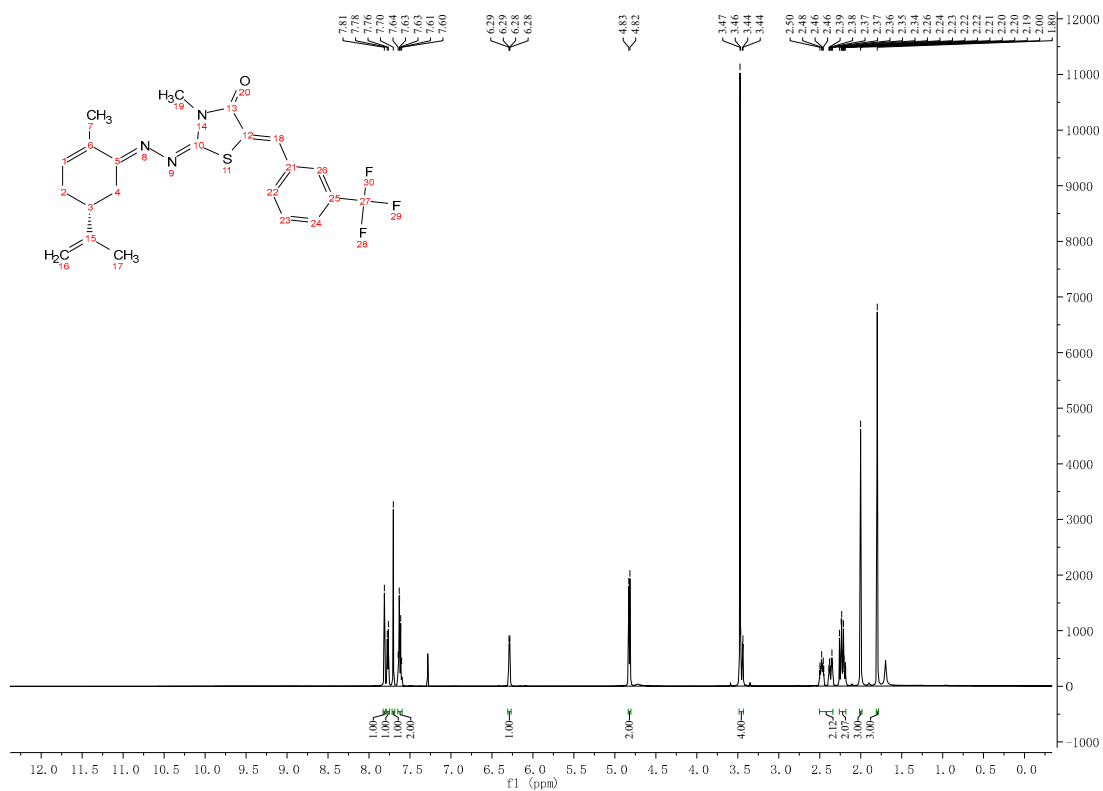

Figure S84  $^1\text{H}$  NMR spectrum of compound 4t.

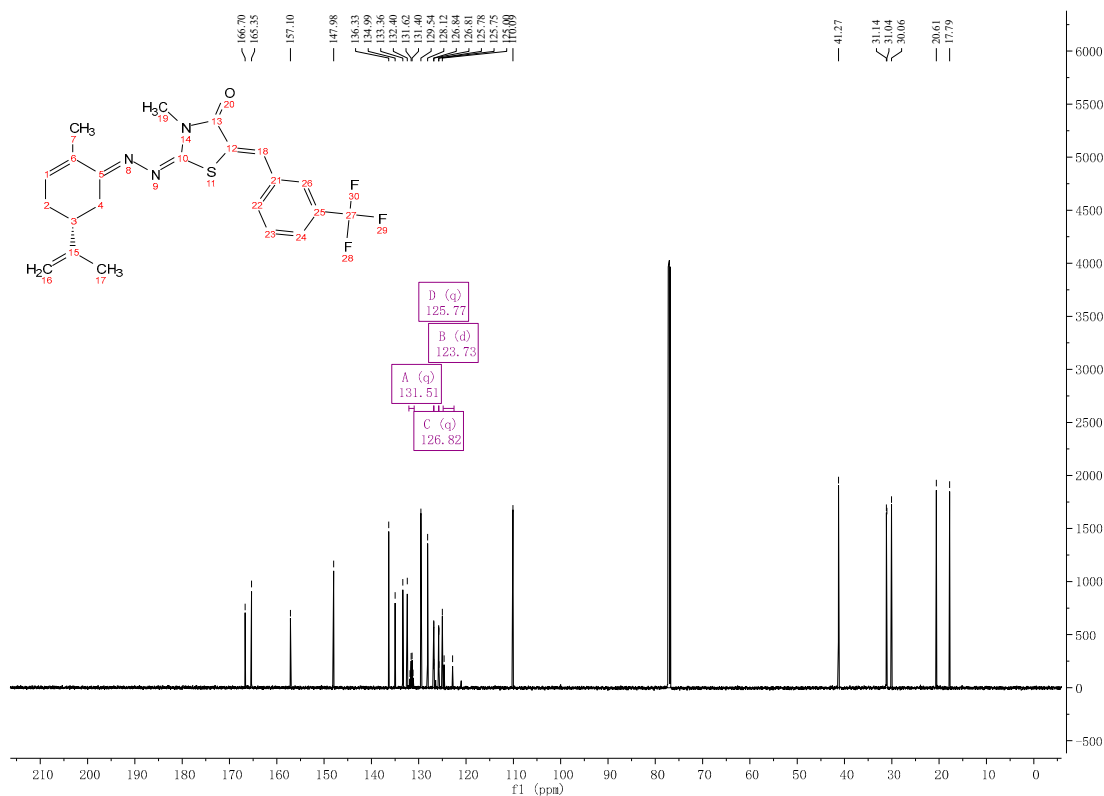

Figure S85  $^{13}\text{C}$  NMR spectrum of compound 4t.

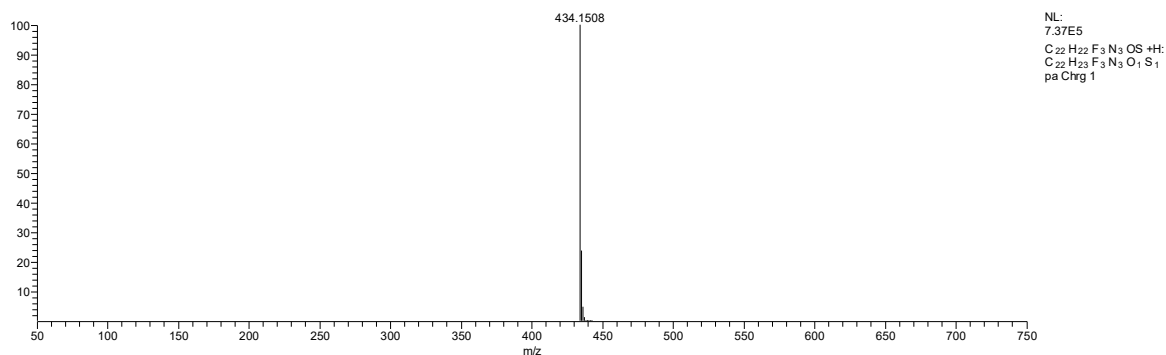

Figure S86 HRMS spectrum of compound 4t.

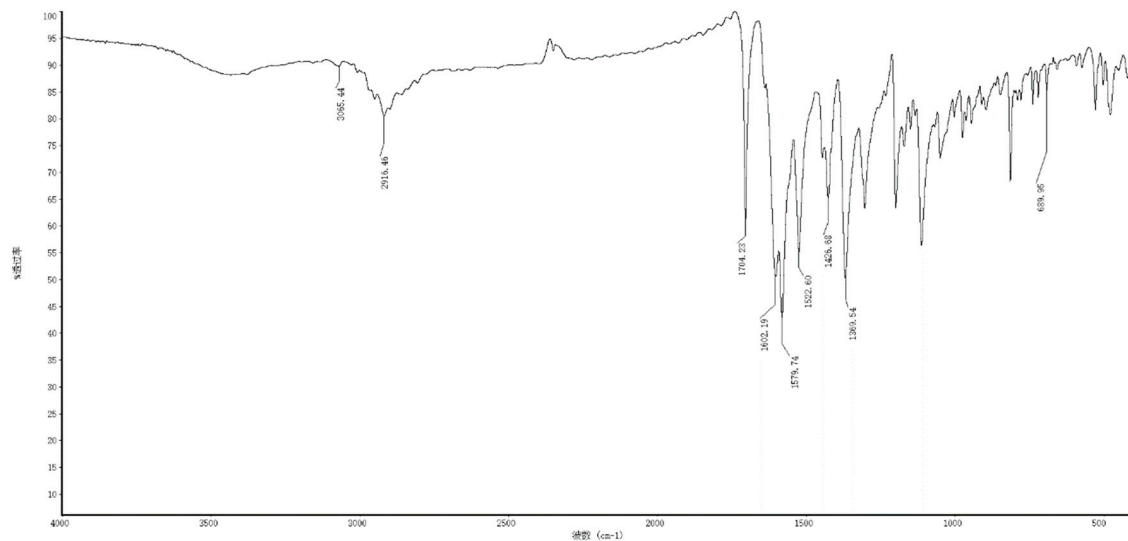

Figure S87 IR spectrum of compound **4u**.

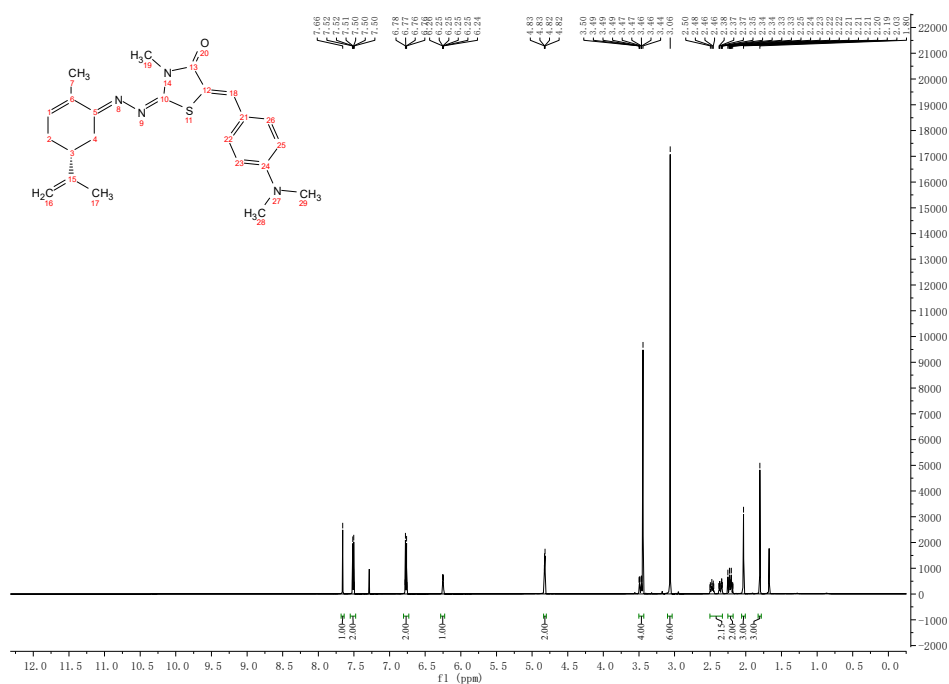

Figure S88 <sup>1</sup>H NMR spectrum of compound **4u**.

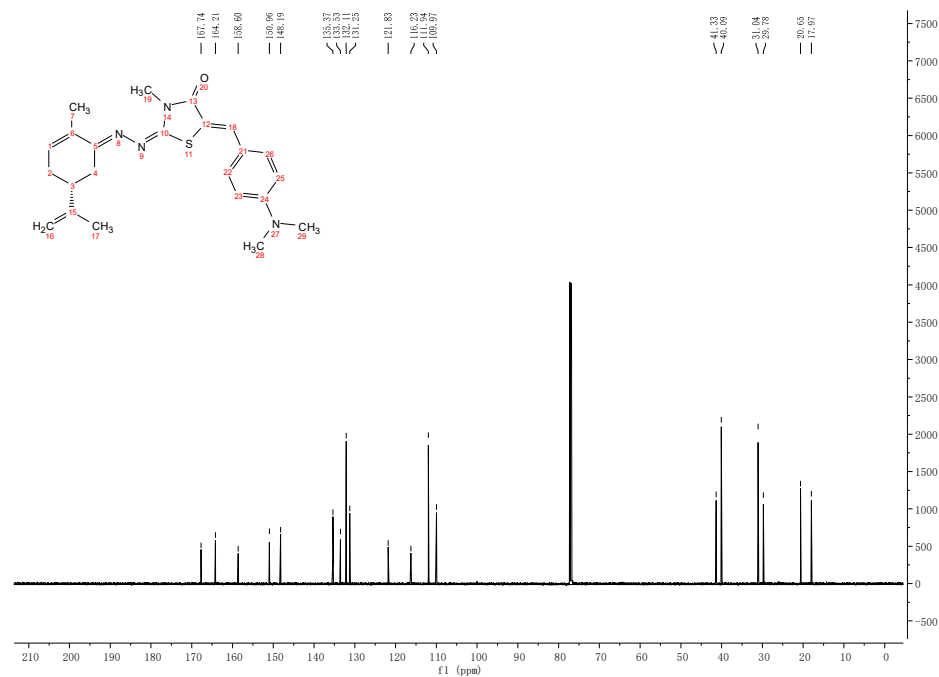



**Figure S90** HRMS spectrum of compound **4u**.

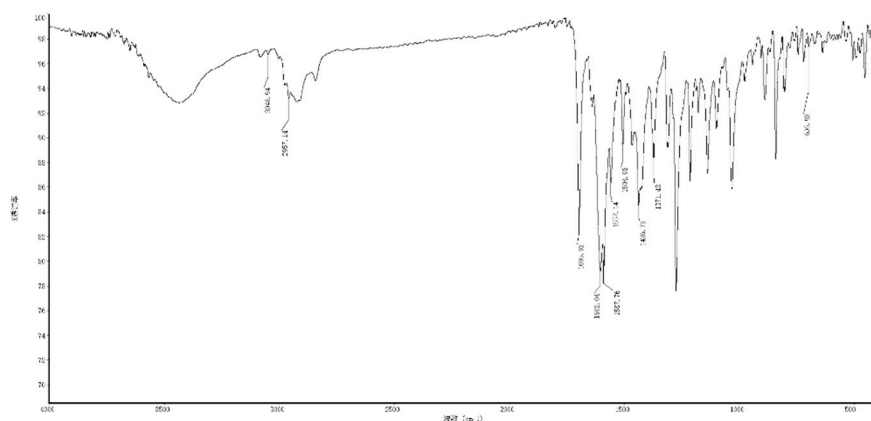

**Figure S91** IR spectrum of compound **4v**.

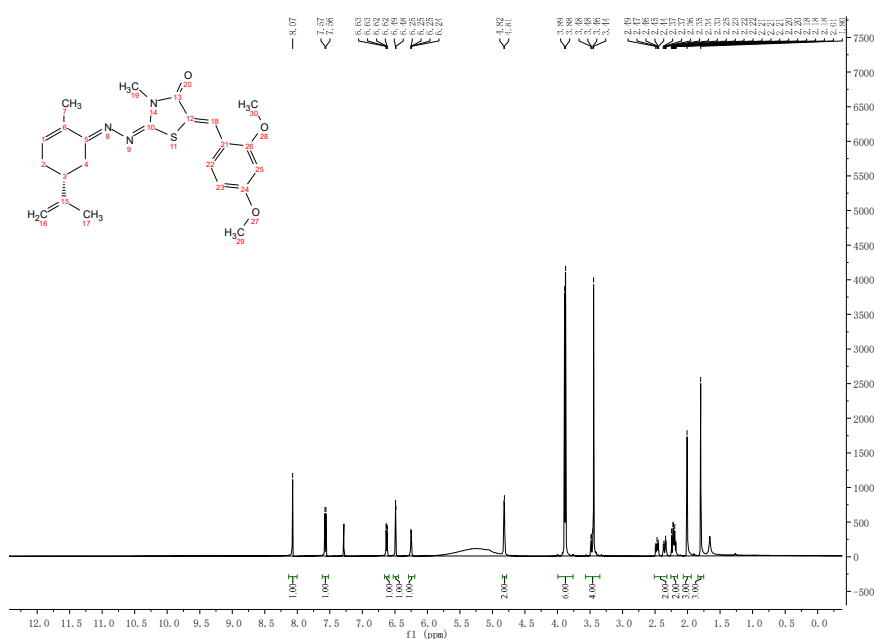

**Figure S92**  $^1\text{H}$  NMR spectrum of compound **4v**.

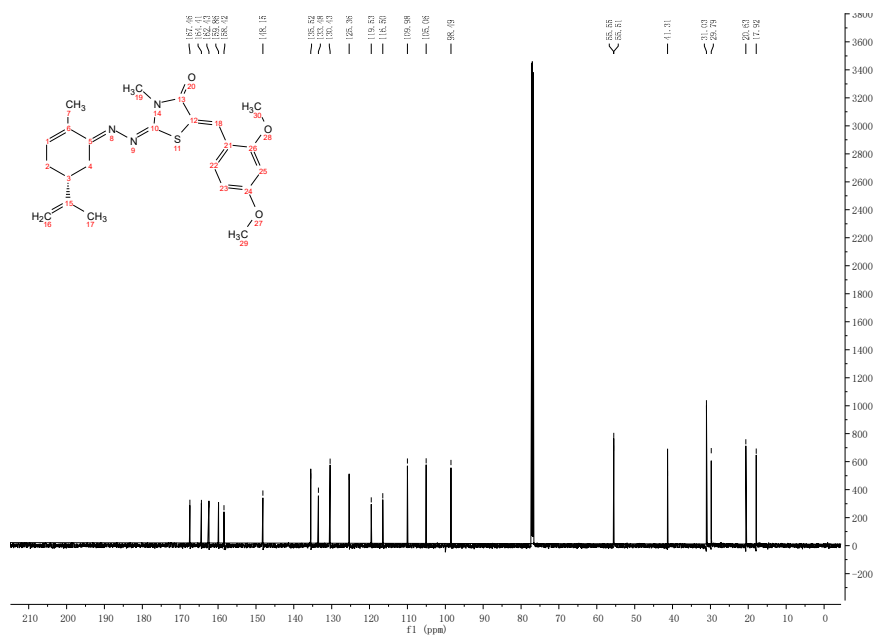

**Figure S93**  $^{13}\text{C}$  NMR spectrum of compound **4v**.

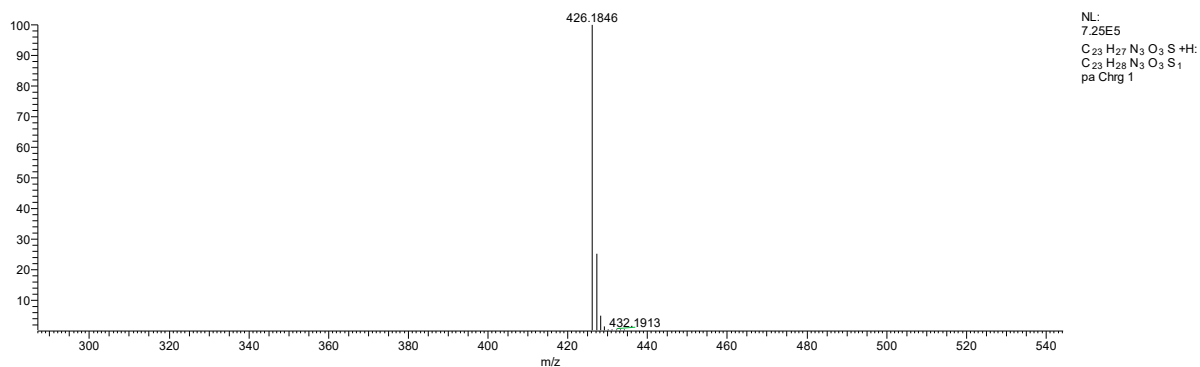

**Figure S94** HRMS spectrum of compound **4v**.

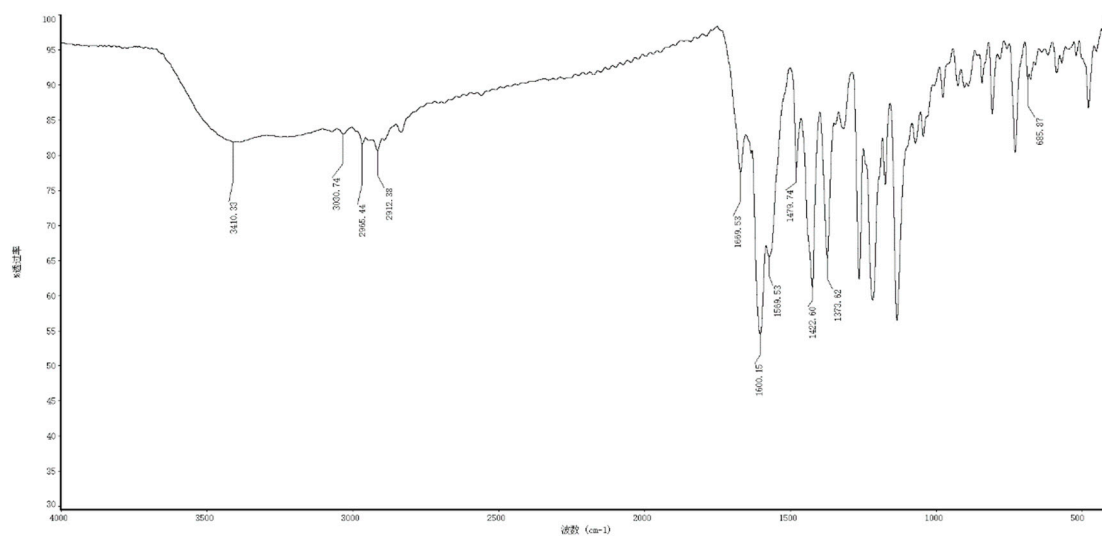

**Figure S95** IR spectrum of compound **4w**.

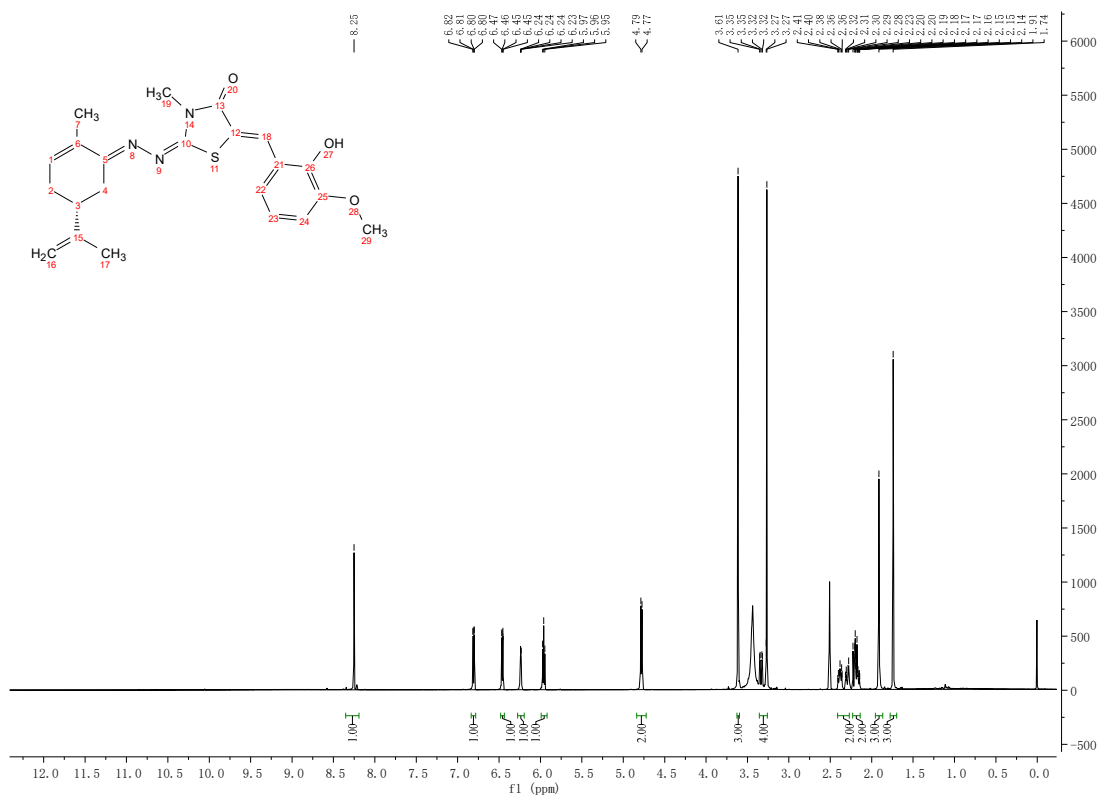

Figure S96  $^1\text{H}$  NMR spectrum of compound 4w.

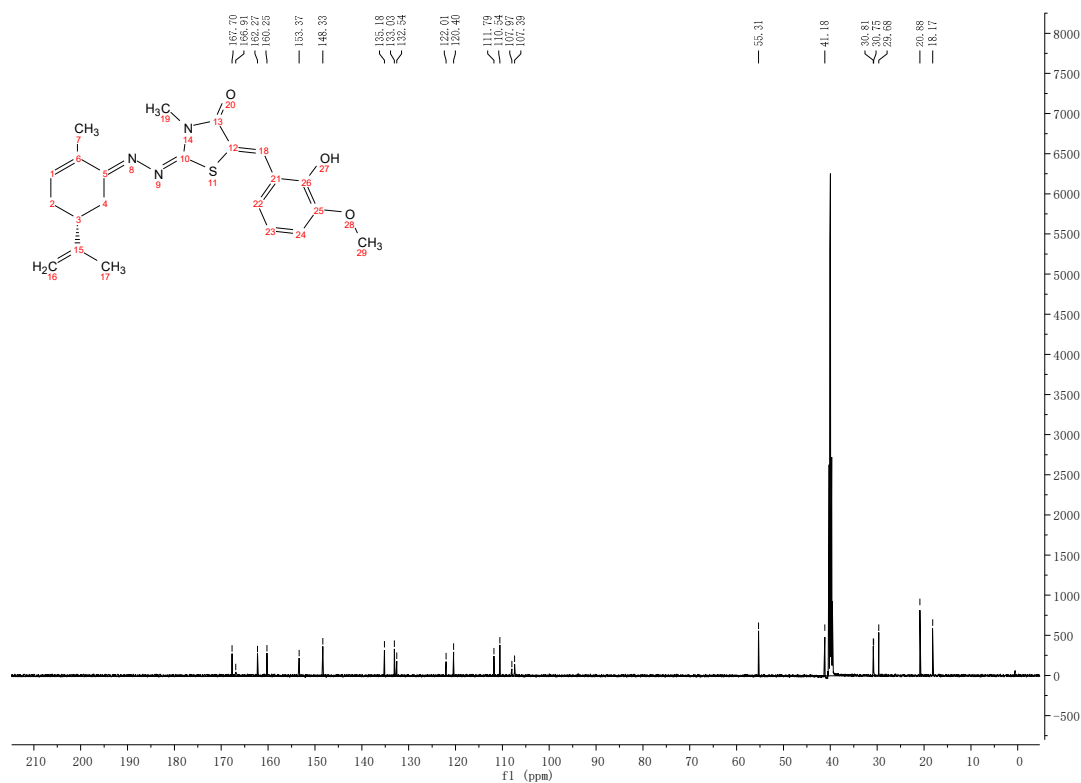

Figure S97  $^{13}\text{C}$  NMR spectrum of compound 4w.

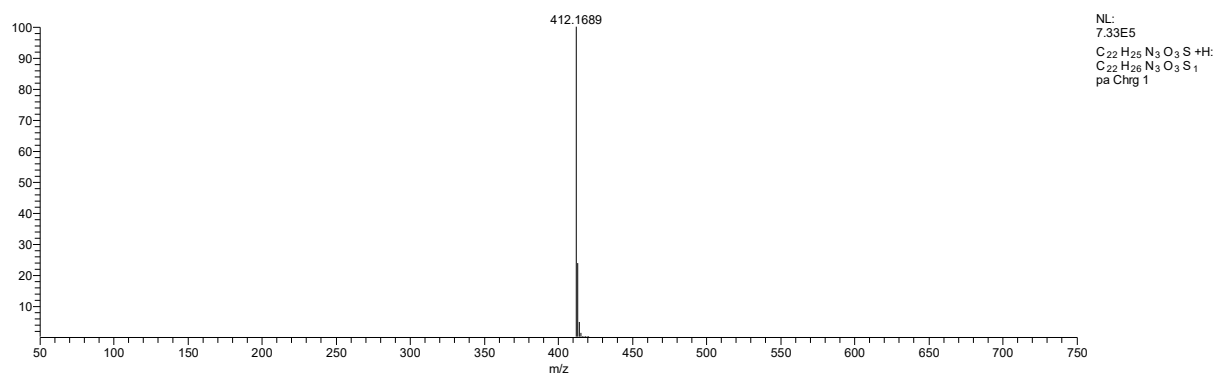

Figure S98 HRMS spectrum of compound 4w.

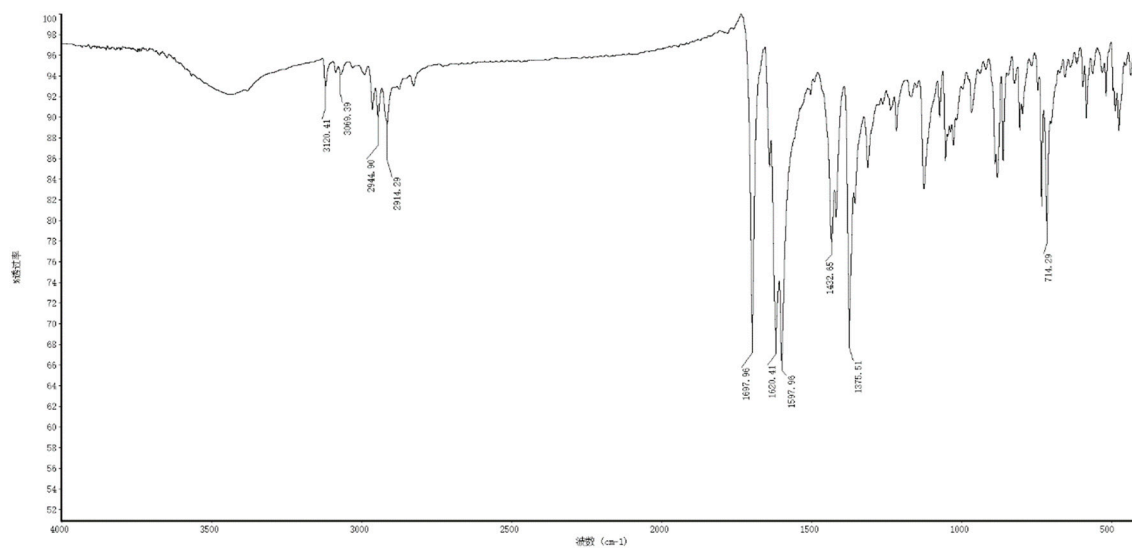

**Figure S99** IR spectrum of compound **4x**.

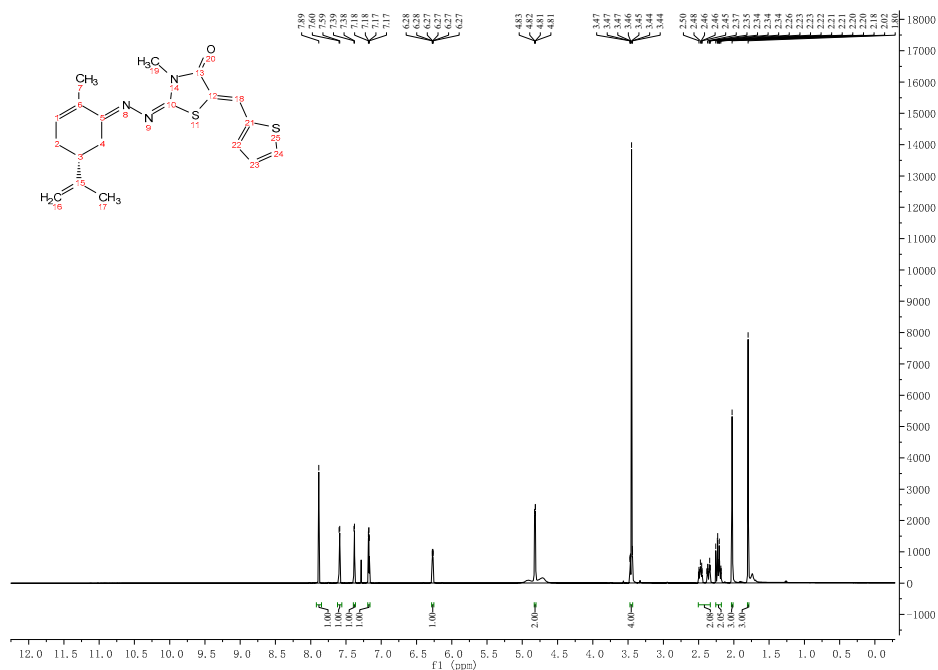

**Figure S100**  $^1\text{H}$  NMR spectrum of compound **4x**.

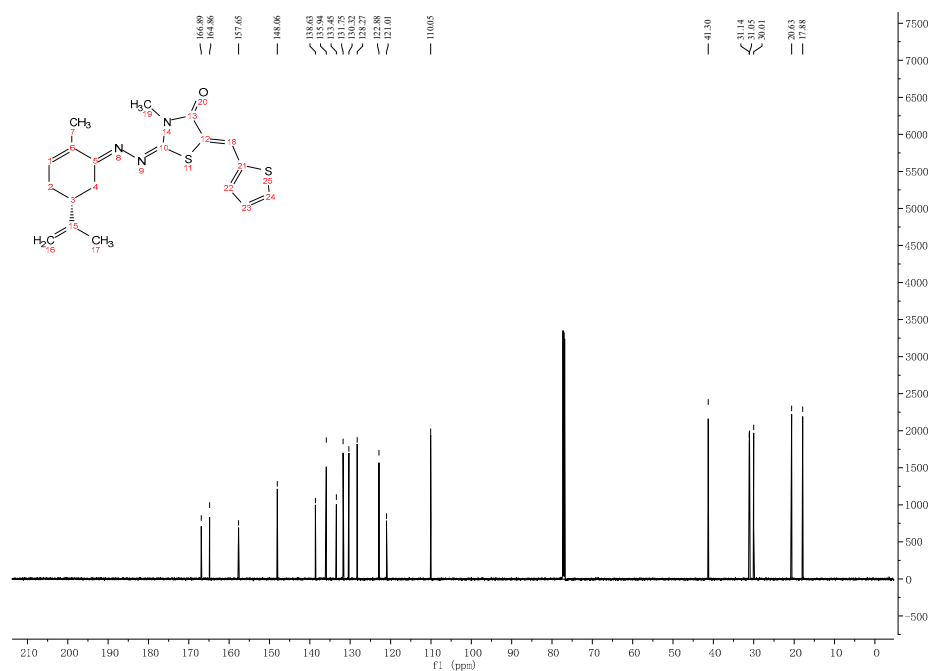

**Figure S101**  $^{13}\text{C}$  NMR spectrum of compound **4x**.

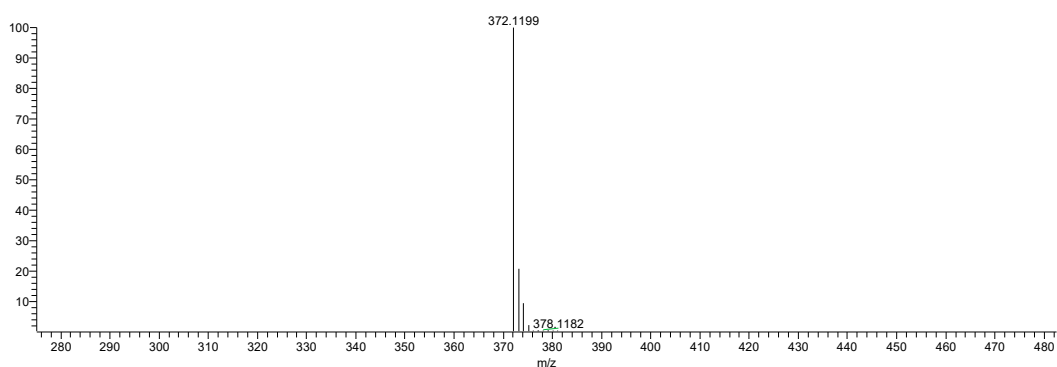

NL:  
7.23E5  
C 19 H 21 N 3 OS 2 +H:  
C 19 H 22 N 3 O 1 S 2  
pa Chrg 1

**Figure S102** HRMS spectrum of compound **4x**.

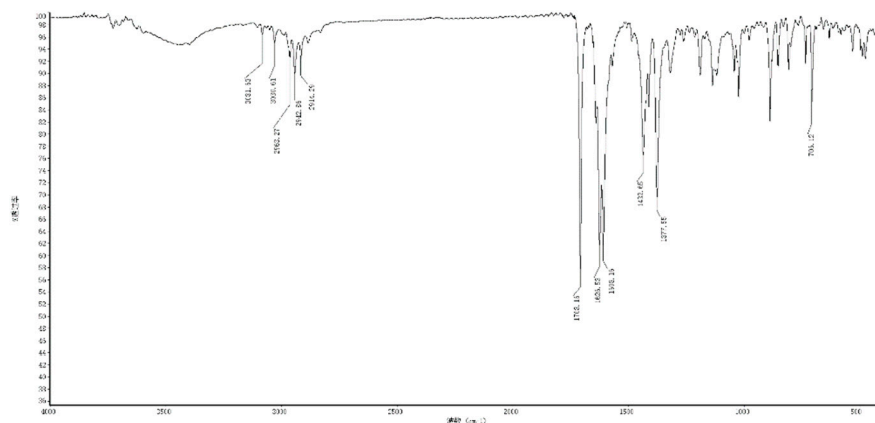

**Figure S103** IR spectrum of compound **4y**.

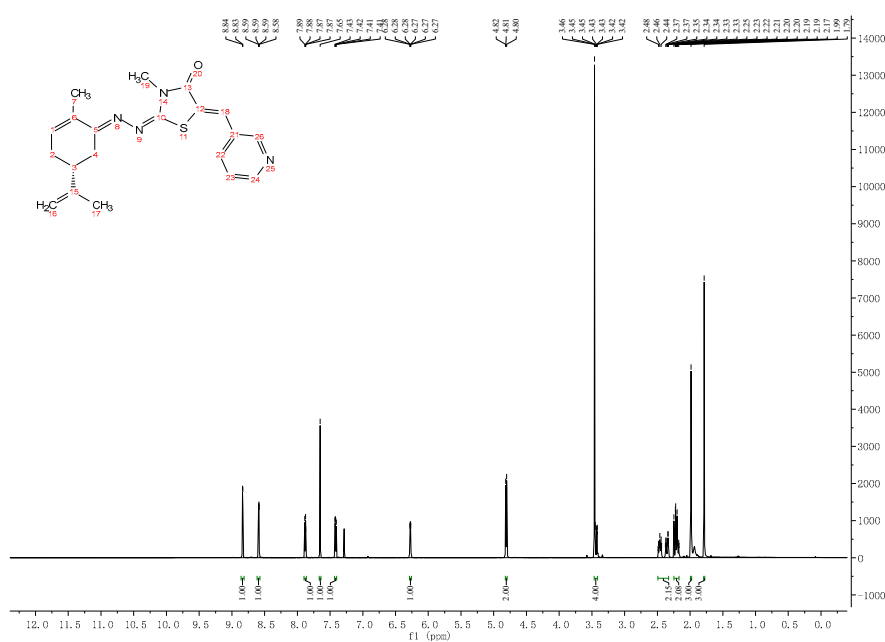

**Figure S104** <sup>1</sup>H NMR spectrum of compound **4y**.

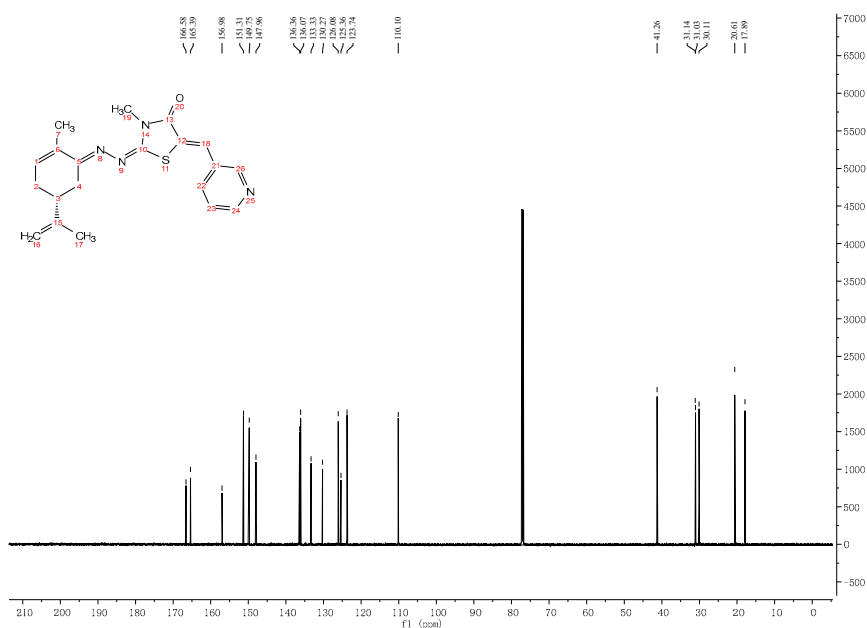

**Figure S105**  $^{13}\text{C}$  NMR spectrum of compound **4y**.

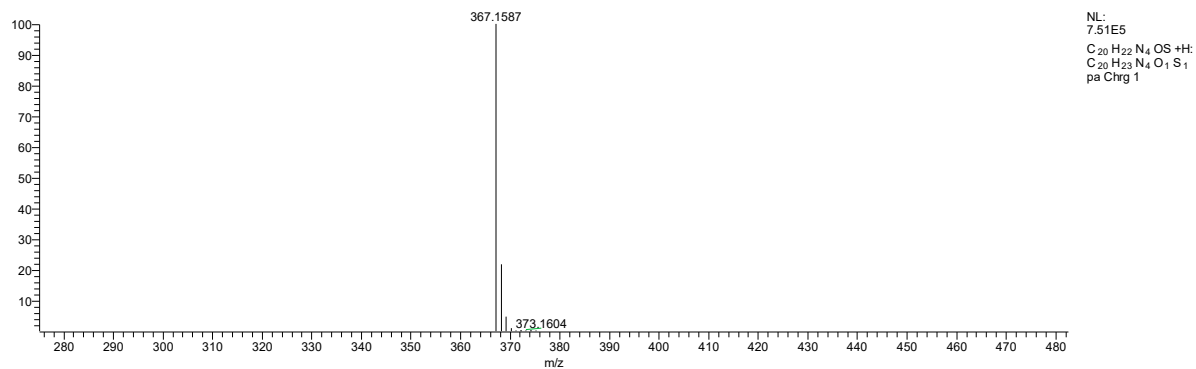

**Figure S106** HRMS spectrum of compound **4y**.

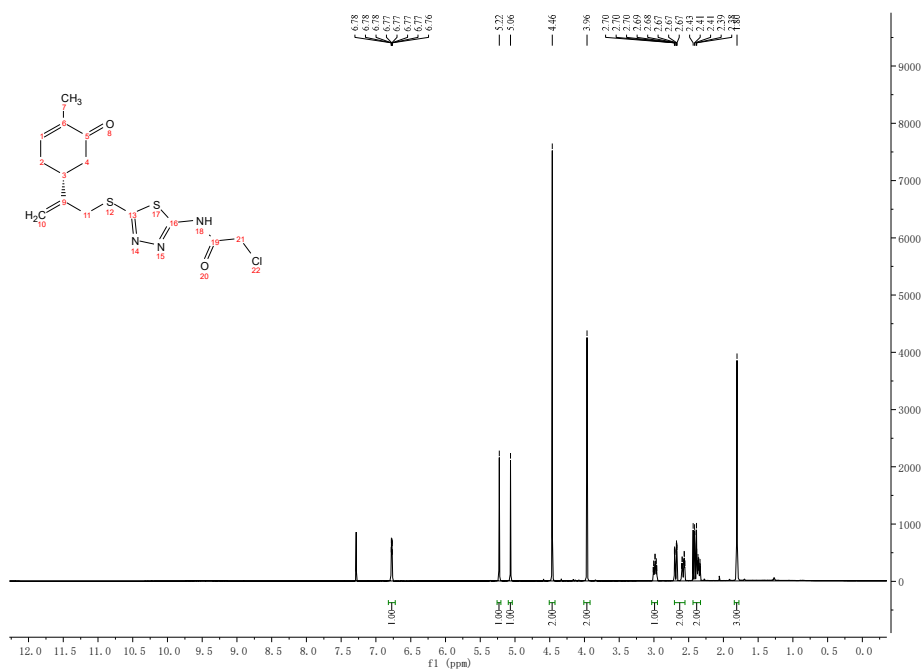

**Figure S107**  $^1\text{H}$  NMR spectrum of compound **6**.

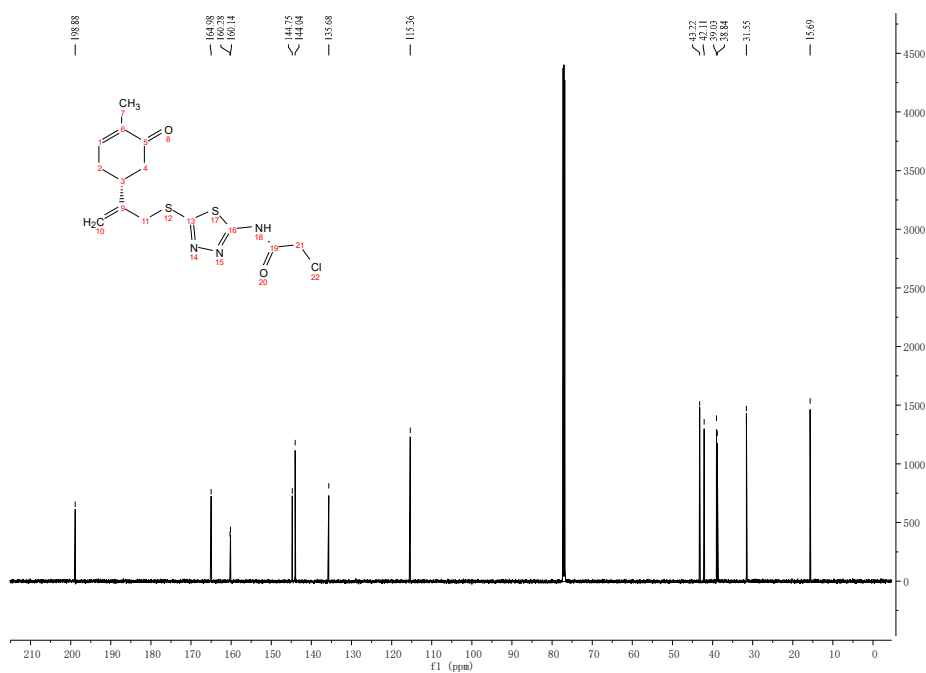

**Figure S108**  $^{13}\text{C}$  NMR spectrum of compound **6**.

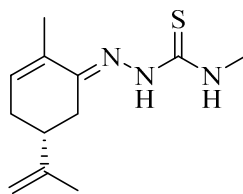

(*R,E*)-*N*-methyl-2-(2-methyl-5-(prop-1-en-2-yl)cyclohex-2-en-1-ylidene)hydrazine-1-carbothio-amide (intermediate **2** / *L*-carvone 4-methyl-thiosemicarbazone): white solid; yield, 62.8%;  $^1\text{H}$  NMR (600 MHz,  $\text{CDCl}_3$ )  $\delta$  8.66 (s, 1H, N-H), 7.51 (d,  $J = 2.1$  Hz, 1H, N-H), 6.24 – 6.11 (m, 1H, =C-H), 4.81 (dd,  $J = 18.3$ , 17.1 Hz, 2H, =CH<sub>2</sub>), 3.24 (d,  $J = 4.9$  Hz, 3H, N-CH<sub>3</sub>), 2.69 (dd,  $J = 15.8$ , 3.9 Hz, 1H, CH), 2.45 – 2.28 (m, 2H, CH<sub>2</sub>), 2.15 – 2.06 (m, 2H, CH<sub>2</sub>), 1.88 – 1.84 (m, 3H, -CH<sub>3</sub>), 1.76 (s, 3H, -CH<sub>3</sub>);  $^{13}\text{C}$  NMR (151 MHz,  $\text{CDCl}_3$ )  $\delta$  178.76, 148.74, 146.92, 134.53, 132.02, 110.71, 40.60, 31.20, 30.05, 29.02, 20.60, 17.80; HRMS (APCI,  $m/z$ ): calcd. for  $\text{C}_{12}\text{H}_{20}\text{N}_3\text{S}^+$  ( $[\text{M}+\text{H}]^+$ ) 238.1378, found 238.1372.

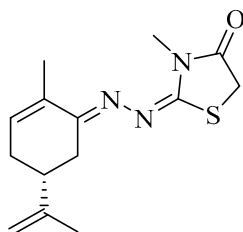

(*E*)-3-methyl-2-(((*R,E*)-2-methyl-5-(prop-1-en-2-yl)cyclohex-2-en-1-ylidene)hydrazineylidene)thiazolidin-4-one (intermediate **3**): white solid; yield, 93.0%;  $^1\text{H}$  NMR (600 MHz,  $\text{CDCl}_3$ )  $\delta$  6.26 – 6.18 (m, 1H, =C-H), 4.80 (dd,  $J = 7.3$ , 0.8 Hz, 2H, =CH<sub>2</sub>), 3.74 (s, 2H, O=C-CH<sub>2</sub>), 3.42 – 3.38 (m, 1H, CH), 3.30 (s, 3H, N-CH<sub>3</sub>), 2.47 – 2.31 (m, 2H, CH<sub>2</sub>), 2.21 – 2.14 (m, 2H, CH<sub>2</sub>), 1.94 (d,  $J = 1.0$  Hz, 3H, -CH<sub>3</sub>), 1.78 (s, 3H, -CH<sub>3</sub>);  $^{13}\text{C}$  NMR (151 MHz,  $\text{CDCl}_3$ )  $\delta$  172.22, 164.44, 161.68, 148.12, 135.48, 133.42, 109.97, 41.26, 32.40, 30.99, 30.93, 29.83, 20.62, 17.77; HRMS (APCI,  $m/z$ ): calcd. for  $\text{C}_{14}\text{H}_{20}\text{N}_3\text{OS}^+$  ( $[\text{M}+\text{H}]^+$ ) 278.1327, found 278.1322.

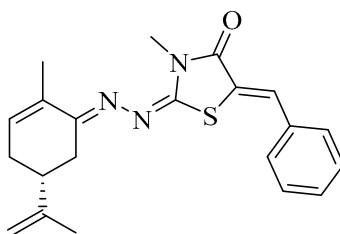

(*E*)-5-((*Z*)-benzylidene)-3-methyl-2-(((*R,E*)-2-methyl-5-(prop-1-en-2-yl)cyclohex-2-en-1-ylidene)hydrazineylidene)thiazolidin-4-one (compound **4a**): yellow solid; yield, 91.6%; m.p.: 146.3 – 147.6 °C; IR (KBr,  $\text{v}/\text{cm}^{-1}$ ): 3079.59 (=C-H, Ar-H), 2946.69, 2918.37 (C-H), 1711.85 (C=O), 1597.22 (C=C), 1556.46, 1426.07, 1365.97 (Ar), 689.59 (C-S-C);  $^1\text{H}$  NMR (600 MHz,  $\text{CDCl}_3$ )  $\delta$  7.72 (s, 1H, =C-H), 7.60

(d,  $J = 7.6$  Hz, 2H, Ar-H), 7.48 (t,  $J = 7.6$  Hz, 2H, Ar-H), 7.40 (t,  $J = 7.3$  Hz, 1H, Ar-H), 6.27 (d,  $J = 4.5$  Hz, 1H, =C-H), 4.83 (d,  $J = 6.8$  Hz, 2H, =CH<sub>2</sub>), 3.51 – 3.41 (m, 4H, N-CH<sub>3</sub> & CH), 2.52 – 2.32 (m, 2H, CH<sub>2</sub>), 2.22 (dt,  $J = 26.5, 13.4$  Hz, 2H, CH<sub>2</sub>), 2.02 (s, 3H, =C-CH<sub>3</sub>), 1.80 (s, 3H, =C-CH<sub>3</sub>); <sup>13</sup>C NMR (151 MHz, CDCl<sub>3</sub>):  $\delta$  167.10, 164.93, 157.73, 148.06, 135.94, 134.17, 133.44, 130.21, 130.09, 129.51, 129.00, 122.70, 110.06, 41.30, 31.10, 31.05, 29.95, 20.64, 17.95; HRMS (APCI,  $m/z$ ): calcd. for C<sub>21</sub>H<sub>24</sub>N<sub>3</sub>OS<sup>+</sup> ([M+H]<sup>+</sup>) 366.1640, found 366.1635.

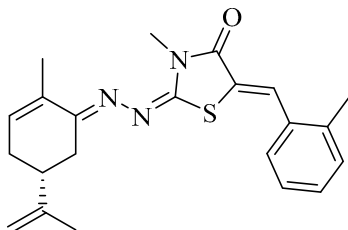

(*E*)-3-methyl-2-(((*R,E*)-2-methyl-5-(prop-1-en-2-yl)cyclohex-2-en-1-ylidene)hydrazineylidene)-5-((*Z*)-2-methylbenzylidene)thiazolidin-4-one (compound **4b**): yellow solid; yield, 83.2%; m.p.: 133.3 – 134.5 °C; IR (KBr,  $\nu/\text{cm}^{-1}$ ): 3068.90 (=C-H, Ar-H), 2948.07, 2919.64 (C-H), 1704.24 (C=O), 1601.18 (C=C), 1562.09, 1430.60, 1370.19 (Ar), 702.07 (C-S-C); <sup>1</sup>H NMR (600 MHz, CDCl<sub>3</sub>)  $\delta$  7.91 (s, 1H, =C-H), 7.62 (d,  $J = 7.5$  Hz, 1H, Ar-H), 7.34 – 7.26 (m, 3H, Ar-H), 6.25 (d,  $J = 5.6$  Hz, 1H, =C-H), 4.82 (d,  $J = 7.3$  Hz, 2H, =CH<sub>2</sub>), 3.48 – 3.44 (m, 4H, N-CH<sub>3</sub> & CH), 2.49 – 2.44 (m, 4H, Ar-CH<sub>3</sub> & CH<sub>2</sub>-a), 2.35 (dt,  $J = 17.7, 5.0$  Hz, 1H, CH<sub>2</sub>-b), 2.25 – 2.17 (m, 2H, CH<sub>2</sub>), 1.99 (s, 3H, =C-CH<sub>3</sub>), 1.80 (s, 3H, =C-CH<sub>3</sub>); <sup>13</sup>C NMR (151 MHz, CDCl<sub>3</sub>):  $\delta$  166.88, 164.81, 157.99, 148.06, 138.54, 135.83, 133.45, 133.22, 130.78, 129.49, 128.13, 127.80, 126.37, 124.02, 110.06, 41.30, 31.08, 31.04, 29.86, 20.64, 20.05, 17.93; HRMS (APCI,  $m/z$ ): calcd. for C<sub>22</sub>H<sub>26</sub>N<sub>3</sub>OS<sup>+</sup> ([M+H]<sup>+</sup>) 380.1797, found 380.1791.

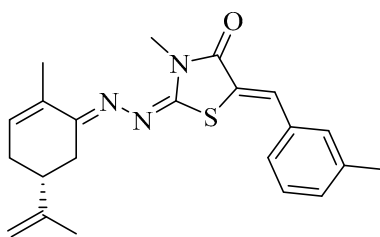

(*E*)-3-methyl-2-(((*R,E*)-2-methyl-5-(prop-1-en-2-yl)cyclohex-2-en-1-ylidene)hydrazineylidene)-5-((*Z*)-3-methylbenzylidene)thiazolidin-4-one (compound **4c**): yellow solid; yield, 85.9%; m.p.: 133.2 – 134.4 °C; IR (KBr,  $\nu/\text{cm}^{-1}$ ): 3076.01 (=C-H, Ar-H), 2944.52, 2919.64 (C-H), 1700.69 (C=O), 1604.74 (C=C), 1562.09, 1430.60, 1370.19 (Ar), 687.86 (C-S-C); <sup>1</sup>H NMR (600 MHz, CDCl<sub>3</sub>)  $\delta$  7.69 (s, 1H, =C-H), 7.43 – 7.36 (m, 3H, Ar-H), 7.22 (d,  $J = 7.5$  Hz, 1H, Ar-H), 6.27 (dd,  $J = 3.6, 1.4$  Hz, 1H, =C-H), 4.82 (d,  $J = 6.9$  Hz, 2H, =CH<sub>2</sub>), 3.48 – 3.44 (m, 4H, N-CH<sub>3</sub> & CH), 2.51 – 2.34 (m, 5H, Ar-CH<sub>3</sub> & CH<sub>2</sub>), 2.26 – 2.18 (m, 2H, CH<sub>2</sub>), 2.02 (s, 3H, =C-CH<sub>3</sub>), 1.80 (s, 3H, =C-CH<sub>3</sub>); <sup>13</sup>C NMR (151 MHz, CDCl<sub>3</sub>):  $\delta$  167.17, 164.91, 157.78, 148.07, 138.69, 135.91, 134.12, 133.43, 131.00, 130.50, 130.42, 128.89, 126.97, 122.40,



110.05, 41.30, 31.10, 31.04, 29.92, 21.46, 20.63, 17.90; HRMS (APCI,  $m/z$ ): calcd. for  $C_{22}H_{26}N_3OS^+$  ( $[M+H]^+$ ) 380.1797, found 380.1791.

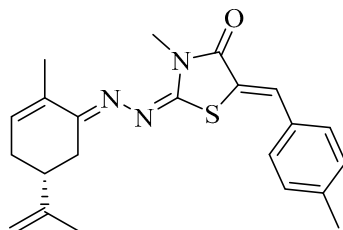

(*E*)-3-methyl-2-(((*R,E*)-2-methyl-5-(prop-1-en-2-yl)cyclohex-2-en-1-ylidene)hydrazineylidene)-5-((*Z*)-4-methylbenzylidene)thiazolidin-4-one (compound **4d**): yellow solid; yield, 89.8%; m.p.: 155.3 – 157.0 °C; IR (KBr,  $\nu/cm^{-1}$ ): 3016.33 (=C-H, Ar-H), 2969.39, 2920.41 (C-H), 1716.33 (C=O), 1595.92 (C=C), 1553.06, 1424.49, 1371.43 (Ar), 687.76 (C-S-C);  $^1H$  NMR (600 MHz,  $CDCl_3$ )  $\delta$  7.69 (s, 1H, =C-H), 7.49 (d,  $J$  = 8.1 Hz, 2H, Ar-H), 7.29 (d,  $J$  = 8.0 Hz, 2H, Ar-H), 6.38 – 6.13 (m, 1H, =C-H), 4.82 (dd,  $J$  = 5.9, 1.0 Hz, 2H, =CH<sub>2</sub>), 3.56 – 3.36 (m, 4H, N-CH<sub>3</sub> & CH), 2.51 – 2.33 (m, 5H, Ar-CH<sub>3</sub> & CH<sub>2</sub>), 2.26 – 2.17 (m, 2H, CH<sub>2</sub>), 2.02 (s, 3H, =C-CH<sub>3</sub>), 1.80 (s, 3H, =C-CH<sub>3</sub>);  $^{13}C$  NMR (151 MHz,  $CDCl_3$ ):  $\delta$  167.24, 164.78, 157.92, 148.08, 140.00, 135.82, 133.45, 131.41, 130.34, 130.12, 129.75, 121.52, 110.04, 41.30, 31.08, 31.04, 29.90, 21.55, 20.64, 17.94; HRMS (APCI,  $m/z$ ): calcd. for  $C_{22}H_{26}N_3OS^+$  ( $[M+H]^+$ ) 380.1797, found 380.1791.

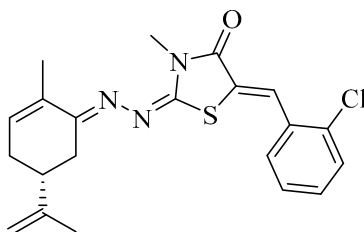

(*E*)-5-((*Z*)-2-chlorobenzylidene)-3-methyl-2-(((*R,E*)-2-methyl-5-(prop-1-en-2-yl)cyclohex-2-en-1-ylidene)hydrazineylidene)thiazolidin-4-one (compound **4e**): yellow solid; yield, 78.5%; m.p.: 177.7 – 179.3 °C; IR (KBr,  $\nu/cm^{-1}$ ): 3068.91 (=C-H, Ar-H), 2972.98, 2917.87 (C-H), 1707.52 (C=O), 1599.34 (C=C), 1558.52, 1429.93, 1368.70 (Ar), 678.82 (C-S-C);  $^1H$  NMR (600 MHz,  $CDCl_3$ )  $\delta$  8.06 (s, 1H, =C-H), 7.70 (dd,  $J$  = 7.8, 1.3 Hz, 1H, Ar-H), 7.49 (dd,  $J$  = 8.0, 1.0 Hz, 1H, Ar-H), 7.41 (dd,  $J$  = 11.0, 4.1 Hz, 1H, Ar-H), 7.33 (td,  $J$  = 7.8, 1.5 Hz, 1H, Ar-H), 6.32 – 6.24 (m, 1H, =C-H), 4.85 – 4.80 (m, 2H, =CH<sub>2</sub>), 3.49 – 3.43 (m, 4H, N-CH<sub>3</sub> & CH), 2.50 – 2.34 (m, 2H, CH<sub>2</sub>), 2.26 – 2.18 (m, 2H, CH<sub>2</sub>), 1.98 (s, 3H, =C-CH<sub>3</sub>), 1.80 (s, 3H, =C-CH<sub>3</sub>);  $^{13}C$  NMR (151 MHz,  $CDCl_3$ ):  $\delta$  166.55, 165.17, 157.36, 148.02, 136.13, 135.52, 133.35, 132.60, 130.37, 130.22, 129.12, 127.11, 126.37, 125.67, 110.08, 41.28, 31.13, 31.03, 29.99, 20.62, 17.89; HRMS (APCI,  $m/z$ ): calcd. for  $C_{21}H_{23}ClN_3OS^+$  ( $[M+H]^+$ ) 400.1250, found 400.1245.

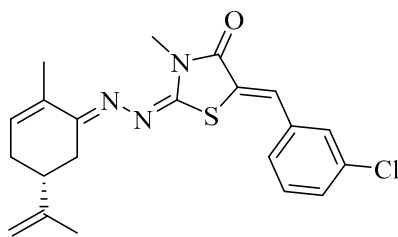

(*E*)-5-((*Z*)-3-chlorobenzylidene)-3-methyl-2-(((*R,E*)-2-methyl-5-(prop-1-en-2-yl)cyclohex-2-en-1-ylidene)hydrazineylidene)thiazolidin-4-one (compound **4f**): yellow solid; yield, 80.6%; m.p.: 137.5 – 140.4 °C; IR (KBr,  $\nu/\text{cm}^{-1}$ ): 3058.24 (=C-H, Ar-H), 2965.84, 2916.09 (C-H), 1707.80 (C=O), 1597.63 (C=C), 1558.54, 1432.65, 1373.74 (Ar), 679.59 (C-S-C);  $^1\text{H}$  NMR (600 MHz,  $\text{CDCl}_3$ )  $\delta$  7.61 (s, 1H, =C-H), 7.54 (t,  $J$  = 1.7 Hz, 1H, Ar-H), 7.47 (d,  $J$  = 7.7 Hz, 1H, Ar-H), 7.41 (t,  $J$  = 7.8 Hz, 1H, Ar-H), 7.35 (ddd,  $J$  = 7.9, 1.8, 1.1 Hz, 1H, Ar-H), 6.29 – 6.26 (m, 1H, =C-H), 4.82 (dd,  $J$  = 7.6, 0.9 Hz, 2H, =CH<sub>2</sub>), 3.47 – 3.43 (m, 4H, N-CH<sub>3</sub> & CH), 2.50 – 2.34 (m, 2H, CH<sub>2</sub>), 2.25 – 2.18 (m, 2H, CH<sub>2</sub>), 2.01 (s, 3H, =C-CH<sub>3</sub>), 1.80 (s, 3H, =C-CH<sub>3</sub>);  $^{13}\text{C}$  NMR (151 MHz,  $\text{CDCl}_3$ ):  $\delta$  166.75, 165.24, 157.18, 148.00, 136.20, 135.96, 134.98, 133.39, 130.18, 129.93, 129.36, 128.40, 127.70, 124.41, 110.09, 41.28, 31.14, 31.05, 30.03, 20.63, 17.91; HRMS (APCI,  $m/z$ ): calcd. for  $\text{C}_{21}\text{H}_{23}\text{ClN}_3\text{OS}^+$  ( $[\text{M}+\text{H}]^+$ ) 400.1250, found 400.1245.

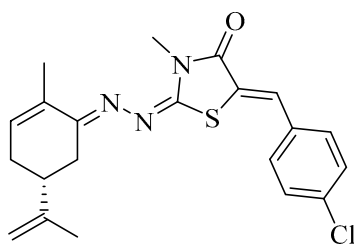

(*E*)-5-((*Z*)-4-chlorobenzylidene)-3-methyl-2-(((*R,E*)-2-methyl-5-(prop-1-en-2-yl)cyclohex-2-en-1-ylidene)hydrazineylidene)thiazolidin-4-one (compound **4g**): yellow solid; yield, 89.3%; m.p.: 178.4 – 179.4 °C; IR (KBr,  $\nu/\text{cm}^{-1}$ ): 3083.67 (=C-H, Ar-H), 2963.27, 2918.37 (C-H), 1708.16 (C=O), 1600.00 (C=C), 1559.18, 1426.53, 1371.43 (Ar), 706.12 (C-S-C);  $^1\text{H}$  NMR (600 MHz,  $\text{CDCl}_3$ )  $\delta$  7.65 (s, 1H, =C-H), 7.52 (d,  $J$  = 8.5 Hz, 2H, Ar-H), 7.49 – 7.41 (m, 2H, Ar-H), 6.31 – 6.26 (m, 1H, =C-H), 4.83 – 4.81 (m, 2H, =CH<sub>2</sub>), 3.49 – 3.42 (m, 4H, N-CH<sub>3</sub> & CH), 2.51 – 2.34 (m, 2H, CH<sub>2</sub>), 2.26 – 2.18 (m, 2H, CH<sub>2</sub>), 2.01 (s, 3H, =C-CH<sub>3</sub>), 1.80 (s, 3H, =C-CH<sub>3</sub>);  $^{13}\text{C}$  NMR (151 MHz,  $\text{CDCl}_3$ ):  $\delta$  166.94, 165.21, 157.29, 148.02, 136.18, 135.43, 133.36, 132.66, 131.15, 129.29, 128.73, 123.39, 110.07, 41.28, 31.13, 31.04, 30.02, 20.62, 17.91; HRMS (APCI,  $m/z$ ): calcd. for  $\text{C}_{21}\text{H}_{23}\text{ClN}_3\text{OS}^+$  ( $[\text{M}+\text{H}]^+$ ) 400.1250, found 400.1245.

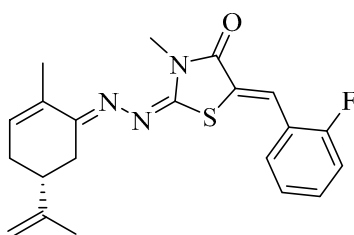

(*E*)-5-((*Z*)-2-fluorobenzylidene)-3-methyl-2-(((*R,E*)-2-methyl-5-(prop-1-en-2-yl)cyclohex-2-en-1-ylidene)hydrazineylidene)thiazolidin-4-one (compound **4h**): yellow solid; yield, 82.0%; m.p.: 133.4 – 135.8 °C; IR (KBr,  $\nu/\text{cm}^{-1}$ ): 3085.61 (=C-H, Ar-H), 2967.07, 2939.98 (C-H), 1703.86 (C=O), 1625.96 (C=C), 1487.11, 1432.93, 1378.74 (Ar), 684.48 (C-S-C);  $^1\text{H}$  NMR (600 MHz,  $\text{CDCl}_3$ )  $\delta$  7.95 (s, 1H, =C-H), 7.68 (td,  $J = 7.7, 1.4$  Hz, 1H, Ar-H), 7.41 – 7.37 (m, 1H, Ar-H), 7.29 (t,  $J = 7.6$  Hz, 1H, Ar-H), 7.20 – 7.11 (m, 1H, Ar-H), 6.32 – 6.22 (m, 1H, =C-H), 4.88 – 4.77 (m, 2H, =CH<sub>2</sub>), 3.53 – 3.38 (m, 4H, N-CH<sub>3</sub> & CH), 2.51 – 2.34 (m, 2H, CH<sub>2</sub>), 2.26 – 2.18 (m, 2H, CH<sub>2</sub>), 2.00 (s, 3H, =C-CH<sub>3</sub>), 1.80 (s, 3H, =C-CH<sub>3</sub>);  $^{13}\text{C}$  NMR (151 MHz,  $\text{CDCl}_3$ ):  $\delta$  166.68, 165.12, 161.23 (d,  $J = 254.2$  Hz), 157.38, 148.02, 136.09, 133.37, 131.20 (d,  $J = 8.6$  Hz), 129.05, 129.04, 124.73, 124.48 (d,  $J = 3.7$  Hz), 122.54 (d,  $J = 12.0$  Hz), 121.87, 121.82, 115.94 (d,  $J = 21.7$  Hz), 110.07, 41.28, 31.12, 31.04, 30.00, 20.62, 17.91; HRMS (APCI,  $m/z$ ): calcd. for  $\text{C}_{21}\text{H}_{23}\text{FN}_3\text{OS}^+$  ( $[\text{M}+\text{H}]^+$ ) 384.1546, found 384.1540.

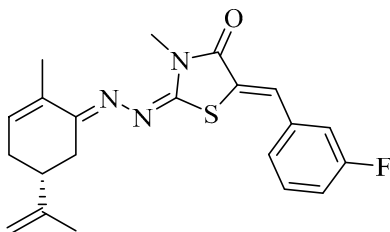

(*E*)-5-((*Z*)-3-fluorobenzylidene)-3-methyl-2-(((*R,E*)-2-methyl-5-(prop-1-en-2-yl)cyclohex-2-en-1-ylidene)hydrazineylidene)thiazolidin-4-one (compound **4i**): yellow solid; yield, 90.3%; m.p.: 144.4 – 146.4 °C; IR (KBr,  $\nu/\text{cm}^{-1}$ ): 3081.63 (=C-H, Ar-H), 2965.31, 2930.61 (C-H), 1708.16 (C=O), 1606.12 (C=C), 1583.67, 1493.88, 1432.65, 1373.47 (Ar), 681.63 (C-S-C);  $^1\text{H}$  NMR (600 MHz,  $\text{CDCl}_3$ )  $\delta$  7.66 (s, 1H, =C-H), 7.45 (td,  $J = 8.0, 6.0$  Hz, 1H, Ar-H), 7.37 (d,  $J = 7.8$  Hz, 1H, Ar-H), 7.30 (s, 1H, Ar-H), 7.10 (td,  $J = 8.3, 2.1$  Hz, 1H, Ar-H), 6.31 – 6.26 (m, 1H, =C-H), 4.82 (d,  $J = 8.0$  Hz, 2H, =CH<sub>2</sub>), 3.47 – 3.43 (m, 4H, N-CH<sub>3</sub> & CH), 2.51 – 2.34 (m, 2H, CH<sub>2</sub>), 2.26 – 2.19 (m, 2H, CH<sub>2</sub>), 2.02 (s, 3H, =C-CH<sub>3</sub>), 1.80 (s, 3H, =C-CH<sub>3</sub>);  $^{13}\text{C}$  NMR (151 MHz,  $\text{CDCl}_3$ ):  $\delta$  166.84, 165.28, 162.90 (d,  $J = 247.0$  Hz), 157.20, 148.02, 136.29 (d,  $J = 7.9$  Hz), 136.20, 133.39, 130.52 (d,  $J = 8.3$  Hz), 128.68 (d,  $J = 2.7$  Hz), 125.80 (d,  $J = 2.8$  Hz), 124.31, 116.47, 116.33 (d,  $J = 1.7$  Hz), 110.08, 41.29, 31.14, 31.04, 30.03, 20.62, 17.93; HRMS (APCI,  $m/z$ ): calcd. for  $\text{C}_{21}\text{H}_{23}\text{FN}_3\text{OS}^+$  ( $[\text{M}+\text{H}]^+$ ) 384.1546, found 384.1540.

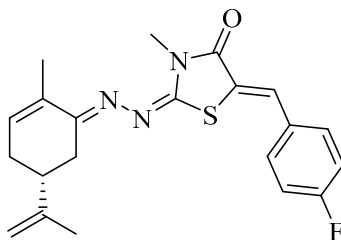

(*E*)-5-((*Z*)-4-fluorobenzylidene)-3-methyl-2-(((*R,E*)-2-methyl-5-(prop-1-en-2-yl)cyclohex-2-en-1-ylidene)hydrazineylidene)thiazolidin-4-one (compound **4j**): yellow solid; yield, 87.7%; m.p.: 187.4 –

188.6 °C; IR (KBr,  $\nu/\text{cm}^{-1}$ ): 3083.67 (=C-H, Ar-H), 2938.78, 2912.24 (C-H), 1704.08 (C=O), 1610.20 (C=C), 1510.20, 1436.73, 1375.51 (Ar), 689.80 (C-S-C);  $^1\text{H}$  NMR (600 MHz,  $\text{CDCl}_3$ )  $\delta$  7.67 (s, 1H, =C-H), 7.58 (dd,  $J$  = 8.7, 5.4 Hz, 2H, Ar-H), 7.18 (t,  $J$  = 8.6 Hz, 2H, Ar-H), 6.29 – 6.26 (m, 1H, =C-H), 4.83 – 4.81 (m, 2H, =CH<sub>2</sub>), 3.48 – 3.44 (m, 4H, N-CH<sub>3</sub> & CH), 2.51 – 2.34 (m, 2H, CH<sub>2</sub>), 2.26 – 2.18 (m, 2H, CH<sub>2</sub>), 2.02 (s, 3H, =C-CH<sub>3</sub>), 1.80 (s, 3H, =C-CH<sub>3</sub>);  $^{13}\text{C}$  NMR (151 MHz,  $\text{CDCl}_3$ ):  $\delta$  167.03, 165.09, 163.05 (d,  $J$  = 252.1 Hz), 157.45, 148.04, 136.09, 133.37, 131.99 (d,  $J$  = 8.6 Hz), 130.47 (d,  $J$  = 3.4 Hz), 128.95, 122.38, 122.37, 116.24 (d,  $J$  = 22.1 Hz), 110.06, 41.29, 31.13, 31.04, 29.98, 20.62, 17.92; HRMS (APCI,  $m/z$ ): calcd. for  $\text{C}_{21}\text{H}_{23}\text{FN}_3\text{OS}^+$  ( $[\text{M}+\text{H}]^+$ ) 384.1546, found 384.1540.

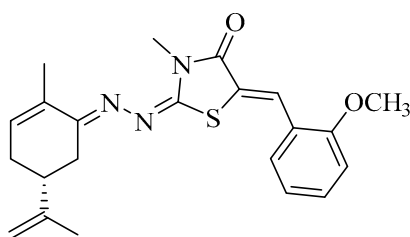

(*E*)-5-((*Z*)-2-methoxybenzylidene)-3-methyl-2-(((*R,E*)-2-methyl-5-(prop-1-en-2-yl)cyclohex-2-en-1-ylidene)hydrazineylidene)thiazolidin-4-one (compound **4k**): yellow solid; yield, 82.1%; m.p.: 207.7 – 208.4 °C; IR (KBr,  $\nu/\text{cm}^{-1}$ ): 3071.43 (=C-H, Ar-H), 2971.43, 2918.37 (C-H), 1704.08 (C=O), 1612.24 (C=C), 1593.88, 1428.57, 1371.43 (Ar), 687.76 (C-S-C);  $^1\text{H}$  NMR (600 MHz,  $\text{CDCl}_3$ )  $\delta$  8.12 (s, 1H, =C-H), 7.62 (dd,  $J$  = 7.7, 1.5 Hz, 1H, Ar-H), 7.38 (td,  $J$  = 8.5, 1.6 Hz, 1H, Ar-H), 7.08 (t,  $J$  = 7.4 Hz, 1H, Ar-H), 6.95 (d,  $J$  = 8.0 Hz, 1H, Ar-H), 6.27 – 6.23 (m, 1H, =C-H), 4.83 – 4.81 (m, 2H, =CH<sub>2</sub>), 3.91 (s, 3H, -OCH<sub>3</sub>), 3.48 – 3.44 (m, 4H, N-CH<sub>3</sub> & CH), 2.50 – 2.33 (m, 2H, CH<sub>2</sub>), 2.25 – 2.17 (m, 2H, CH<sub>2</sub>), 2.00 (s, 3H, =C-CH<sub>3</sub>), 1.80 (s, 3H, =C-CH<sub>3</sub>);  $^{13}\text{C}$  NMR (151 MHz,  $\text{CDCl}_3$ ):  $\delta$  167.20, 164.67, 158.27, 158.14, 148.11, 135.72, 133.46, 131.14, 129.13, 125.52, 123.36, 122.51, 120.70, 110.92, 110.01, 55.52, 41.30, 31.06, 31.03, 29.84, 20.63, 17.91; HRMS (APCI,  $m/z$ ): calcd. for  $\text{C}_{22}\text{H}_{26}\text{N}_3\text{O}_2\text{S}^+$  ( $[\text{M}+\text{H}]^+$ ) 396.1746, found 396.1740.

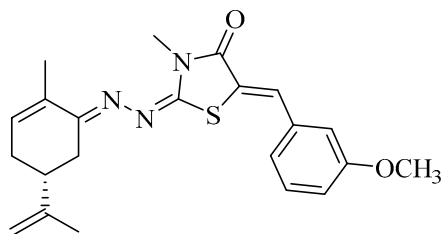

(*E*)-5-((*Z*)-3-methoxybenzylidene)-3-methyl-2-(((*R,E*)-2-methyl-5-(prop-1-en-2-yl)cyclohex-2-en-1-ylidene)hydrazineylidene)thiazolidin-4-one (compound **4l**): yellow solid; yield, 90.5%; m.p.: 91.1 – 92.0 °C; IR (KBr,  $\nu/\text{cm}^{-1}$ ): 3004.08 (=C-H, Ar-H), 2963.27, 2938.78 (C-H), 1704.08 (C=O), 1600.00 (C=C), 1500.00, 1434.69, 1375.51 (Ar), 683.67 (C-S-C);  $^1\text{H}$  NMR (600 MHz,  $\text{CDCl}_3$ )  $\delta$  7.68 (s, 1H, =C-H), 7.39 (t,  $J$  = 8.0 Hz, 1H, Ar-H), 7.20 (d,  $J$  = 7.7 Hz, 1H, Ar-H), 7.14 – 7.08 (m, 1H, Ar-H), 6.99 – 6.92 (m, 1H,

Ar-H), 6.29 – 6.24 (m, 1H, =C-H), 4.83 – 4.81 (m, 2H, =CH<sub>2</sub>), 3.87 (s, 3H, -OCH<sub>3</sub>), 3.48 – 3.42 (m, 4H, N-CH<sub>3</sub> & CH), 2.51 – 2.33 (m, 2H, CH<sub>2</sub>), 2.25 – 2.18 (m, 2H, CH<sub>2</sub>), 2.00 (s, 3H, =C-CH<sub>3</sub>), 1.80 (s, 3H, =C-CH<sub>3</sub>); <sup>13</sup>C NMR (151 MHz, CDCl<sub>3</sub>): δ 167.07, 164.93, 159.87, 157.75, 148.06, 135.98, 135.48, 133.41, 130.17, 129.99, 123.07, 122.51, 115.64, 114.96, 110.05, 55.29, 41.29, 31.09, 31.04, 29.93, 20.63, 17.86; HRMS (APCI, m/z): calcd. for C<sub>22</sub>H<sub>26</sub>N<sub>3</sub>O<sub>2</sub>S<sup>+</sup> ([M+H]<sup>+</sup>) 396.1746, found 396.1740.

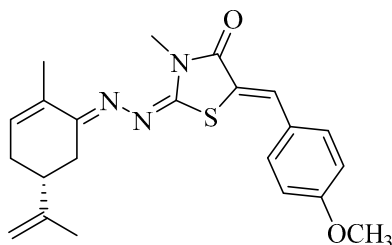

(*E*)-5-((*Z*)-4-methoxybenzylidene)-3-methyl-2-(((*R,E*)-2-methyl-5-(prop-1-en-2-yl)cyclohex-2-en-1-ylidene)hydrazineylidene)thiazolidin-4-one (compound **4m**): yellow solid; yield, 91.2%; m.p.: 148.5 – 150.6 °C; IR (KBr, v/cm<sup>-1</sup>): 3071.43, 3012.24 (=C-H, Ar-H), 2916.33 (C-H), 1712.24 (C=O), 1600.00 (C=C), 1514.29, 1428.57, 1375.51 (Ar), 687.76 (C-S-C); <sup>1</sup>H NMR (600 MHz, CDCl<sub>3</sub>) δ 7.67 (s, 1H, =C-H), 7.55 (d, *J* = 8.7 Hz, 2H, Ar-H), 7.01 (d, *J* = 8.8 Hz, 2H, Ar-H), 6.33 – 6.19 (m, 1H, =C-H), 4.82 (d, *J* = 6.1 Hz, 2H, =CH<sub>2</sub>), 3.88 (s, 3H, -OCH<sub>3</sub>), 3.55 – 3.36 (m, 4H, N-CH<sub>3</sub> & CH), 2.50 – 2.33 (m, 2H, CH<sub>2</sub>), 2.26 – 2.18 (m, 2H, CH<sub>2</sub>), 2.02 (s, 3H, =C-CH<sub>3</sub>), 1.80 (s, 3H, =C-CH<sub>3</sub>); <sup>13</sup>C NMR (151 MHz, CDCl<sub>3</sub>): δ 167.36, 164.70, 160.65, 157.99, 148.10, 135.76, 133.45, 131.93, 130.14, 126.88, 119.84, 114.54, 110.03, 55.43, 41.31, 31.09, 31.04, 29.89, 20.64, 17.95; HRMS (APCI, m/z): calcd. for C<sub>22</sub>H<sub>26</sub>N<sub>3</sub>O<sub>2</sub>S<sup>+</sup> ([M+H]<sup>+</sup>) 396.1746, found 396.1740.

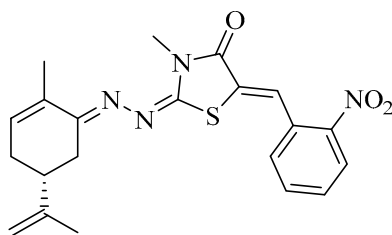

(*E*)-3-methyl-2-(((*R,E*)-2-methyl-5-(prop-1-en-2-yl)cyclohex-2-en-1-ylidene)hydrazineylidene)-5-((*Z*)-2-nitrobenzylidene)thiazolidin-4-one (compound **4n**): yellow solid; yield, 88.3%; m.p.: 152.7 – 154.7 °C; IR (KBr, v/cm<sup>-1</sup>): 3069.39 (=C-H, Ar-H), 2963.27, 2920.41 (C-H), 1708.16 (C=O), 1608.16 (C=C), 1530.61, 1430.61, 1373.47 (Ar), 700.00 (C-S-C); <sup>1</sup>H NMR (600 MHz, CDCl<sub>3</sub>) δ 8.13 (dd, *J* = 8.2, 0.8 Hz, 1H, Ar-H), 8.03 (s, 1H, =C-H), 7.75 (ddd, *J* = 15.0, 7.8, 3.6 Hz, 2H, Ar-H), 7.59 – 7.53 (m, 1H, Ar-H), 6.29 – 6.20 (m, 1H, =C-H), 4.80 (d, *J* = 10.8 Hz, 2H, =CH<sub>2</sub>), 3.51 – 3.39 (m, 4H, N-CH<sub>3</sub> & CH), 2.48 – 2.31 (m, 2H, CH<sub>2</sub>), 2.24 – 2.15 (m, 2H, CH<sub>2</sub>), 1.92 (s, 3H, =C-CH<sub>3</sub>), 1.78 (s, 3H, =C-CH<sub>3</sub>); <sup>13</sup>C NMR (151 MHz, CDCl<sub>3</sub>): δ 165.83, 165.34, 156.95, 148.08, 147.92, 136.35, 133.71, 133.23, 130.18, 129.81,

129.73, 127.99, 125.76, 125.34, 110.11, 41.24, 31.14, 31.01, 30.05, 20.61, 17.82; HRMS (APCI,  $m/z$ ): calcd. for  $C_{21}H_{23}N_4O_3S^+$  ( $[M+H]^+$ ) 411.1491, found 411.1485.

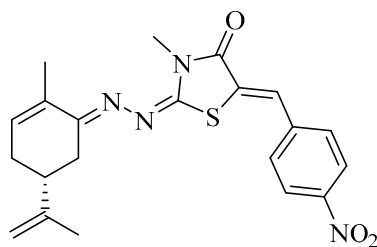

(*E*)-3-methyl-2-(((*R,E*)-2-methyl-5-(prop-1-en-2-yl)cyclohex-2-en-1-ylidene)hydrazineylidene)-5-((*Z*)-4-nitrobenzylidene)thiazolidin-4-one (compound **4o**): yellow solid; yield, 78.2%; m.p.: 227.8 – 228.1 °C; IR (KBr,  $\nu/cm^{-1}$ ): 3081.63 (=C-H, Ar-H), 2924.49 (C-H), 1708.16 (C=O), 1608.16 (C=C), 1512.24, 1432.65, 1375.51 (Ar), 685.71 (C-S-C);  $^1H$  NMR (600 MHz,  $CDCl_3$ )  $\delta$  8.34 (d,  $J$  = 8.7 Hz, 2H, Ar-H), 7.84 – 7.60 (m, 3H, =C-H & Ar-H), 6.32 (dd,  $J$  = 3.5, 1.4 Hz, 1H, =C-H), 4.83 (d,  $J$  = 10.5 Hz, 2H, =CH<sub>2</sub>), 3.65 – 3.34 (m, 4H, N-CH<sub>3</sub> & CH), 2.51 – 2.36 (m, 2H, CH<sub>2</sub>), 2.28 – 2.19 (m, 2H, CH<sub>2</sub>), 2.02 (s, 3H, =C-CH<sub>3</sub>), 1.80 (s, 3H, =C-CH<sub>3</sub>);  $^{13}C$  NMR (151 MHz,  $CDCl_3$ ):  $\delta$  166.44, 165.83, 156.51, 147.92, 147.37, 140.43, 136.73, 133.26, 130.40, 127.54, 126.91, 124.23, 110.15, 41.27, 31.21, 31.05, 30.22, 20.61, 17.90; HRMS (APCI,  $m/z$ ): calcd. for  $C_{21}H_{23}N_4O_3S^+$  ( $[M+H]^+$ ) 411.1491, found 411.1485.

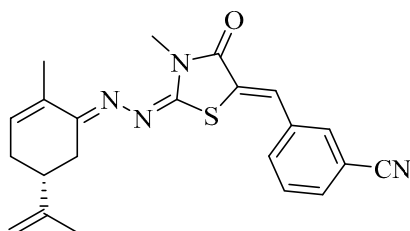

3-((*Z*)-((*E*)-3-methyl-2-(((*R,E*)-2-methyl-5-(prop-1-en-2-yl)cyclohex-2-en-1-ylidene)hydrazineylidene)-4-oxothiazolidin-5-ylidene)methyl)benzonitrile (compound **4p**): yellow solid; yield, 79.8%; m.p.: 158.6 – 161.7 °C; IR (KBr,  $\nu/cm^{-1}$ ): 3069.39 (=C-H, Ar-H), 2924.49 (C-H), 2230.61 (C≡N), 1712.24 (C=O), 1604.08 (C=C), 1428.57, 1371.43 (Ar), 683.67 (C-S-C);  $^1H$  NMR (600 MHz,  $CDCl_3$ )  $\delta$  7.86 – 7.74 (m, 2H, Ar-H), 7.68 – 7.56 (m, 3H, =C-H & Ar-H), 6.29 (d,  $J$  = 1.4 Hz, 1H, =C-H), 4.83 – 4.80 (m, 2H, =CH<sub>2</sub>), 3.48 – 3.41 (m, 4H, N-CH<sub>3</sub> & CH), 2.44 (ddd,  $J$  = 59.8, 35.6, 10.8 Hz, 2H, CH<sub>2</sub>), 2.26 – 2.17 (m, 2H, CH<sub>2</sub>), 2.00 (s, 3H, =C-CH<sub>3</sub>), 1.79 (s, 3H, =C-CH<sub>3</sub>);  $^{13}C$  NMR (151 MHz,  $CDCl_3$ ):  $\delta$  166.46, 165.64, 156.52, 147.94, 136.53, 135.50, 133.57, 133.32, 133.01, 132.28, 129.88, 127.04, 127.03, 125.84, 118.16, 113.45, 110.12, 41.26, 31.19, 31.04, 30.17, 20.62, 17.98; HRMS (APCI,  $m/z$ ): calcd. for  $C_{22}H_{23}N_4OS^+$  ( $[M+H]^+$ ) 391.1593, found 391.1587.

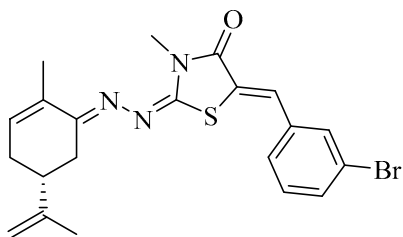

(*E*)-5-((*Z*)-3-bromobenzylidene)-3-methyl-2-(((*R,E*)-2-methyl-5-(prop-1-en-2-yl)cyclohex-2-en-1-ylidene)hydrazineylidene)thiazolidin-4-one (compound **4q**): yellow solid; yield, 77.6%; m.p.: 124.9 – 125.7 °C; IR (KBr,  $\nu/\text{cm}^{-1}$ ): 3068.28 (=C-H, Ar-H), 2970.39, 2916.01 (C-H), 1712.39 (C=O), 1600.00 (C=C), 1556.50, 1433.23, 1375.23 (Ar), 683.90 (C-S-C);  $^1\text{H}$  NMR (600 MHz,  $\text{CDCl}_3$ )  $\delta$  7.69 (s, 1H, =C-H), 7.60 (s, 1H, Ar-H), 7.51 (t,  $J$  = 6.4 Hz, 2H, Ar-H), 7.35 (t,  $J$  = 7.9 Hz, 1H, Ar-H), 6.28 (d,  $J$  = 4.7 Hz, 1H, =C-H), 4.82 (d,  $J$  = 8.3 Hz, 2H, =CH<sub>2</sub>), 3.47 – 3.42 (m, 4H, N-CH<sub>3</sub> & CH), 2.50 – 2.34 (m, 2H, CH<sub>2</sub>), 2.25 – 2.18 (m, 2H, CH<sub>2</sub>), 2.01 (s, 3H, =C-CH<sub>3</sub>), 1.80 (s, 3H, =C-CH<sub>3</sub>);  $^{13}\text{C}$  NMR (151 MHz,  $\text{CDCl}_3$ ):  $\delta$  166.74, 165.26, 157.17, 148.00, 136.24, 136.22, 133.38, 132.92, 132.26, 130.42, 128.30, 128.04, 124.43, 123.08, 110.09, 41.28, 31.14, 31.04, 30.04, 20.63, 17.90; HRMS (APCI,  $m/z$ ): calcd. for  $\text{C}_{21}\text{H}_{23}\text{BrN}_3\text{OS}^+$  ( $[\text{M}+\text{H}]^+$ ) 444.0745, found 444.0740.

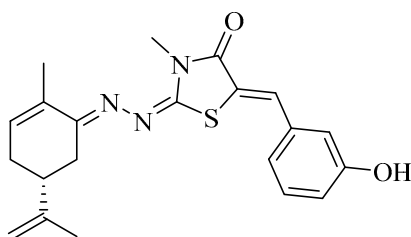

(*E*)-5-((*Z*)-3-hydroxybenzylidene)-3-methyl-2-(((*R,E*)-2-methyl-5-(prop-1-en-2-yl)cyclohex-2-en-1-ylidene)hydrazineylidene)thiazolidin-4-one (compound **4r**): yellow solid; yield, 90.4%; m.p.: 198.9 – 205.0 °C; IR (KBr,  $\nu/\text{cm}^{-1}$ ): 3348.98 (O-H), 3079.59 (=C-H, Ar-H), 2924.49 (C-H), 1701.20 (C=O), 1598.69 (C=C), 1563.20, 1437.02, 1371.43 (Ar), 679.59 (C-S-C);  $^1\text{H}$  NMR (600 MHz,  $\text{DMSO}-d_6$ )  $\delta$  9.82 (s, 1H, -OH), 7.52 (s, 1H, =C-H), 7.30 (t,  $J$  = 7.9 Hz, 1H, Ar-H), 7.06 – 6.98 (m, 2H, Ar-H), 6.85 (dd,  $J$  = 8.1, 1.8 Hz, 1H, Ar-H), 6.26 (dd,  $J$  = 3.1, 1.4 Hz, 1H, =C-H), 4.76 (s, 2H, =CH<sub>2</sub>), 3.32 – 3.25 (m, 4H, N-CH<sub>3</sub> & CH), 2.38 – 2.24 (m, 2H, CH<sub>2</sub>), 2.20 – 2.09 (m, 2H, CH<sub>2</sub>), 1.89 (s, 3H, =C-CH<sub>3</sub>), 1.71 (s, 3H, =C-CH<sub>3</sub>);  $^{13}\text{C}$  NMR (151 MHz,  $\text{DMSO}-d_6$ ):  $\delta$  166.44, 164.45, 158.25, 158.04, 148.11, 136.70, 135.28, 132.74, 130.63, 130.09, 122.45, 121.56, 117.55, 116.34, 110.58, 41.06, 30.94, 30.76, 30.17, 20.79, 18.06; HRMS (APCI,  $m/z$ ): calcd. for  $\text{C}_{21}\text{H}_{24}\text{N}_3\text{O}_2\text{S}^+$  ( $[\text{M}+\text{H}]^+$ ) 382.1589, found 382.1584.

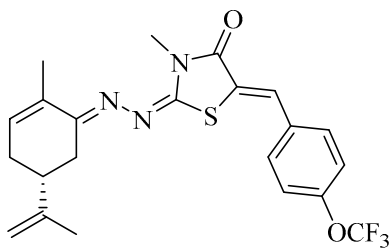

(*E*)-3-methyl-2-(((*R,E*)-2-methyl-5-(prop-1-en-2-yl)cyclohex-2-en-1-ylidene)hydrazineylidene)-5-((*Z*)-4-(trifluoromethoxy)benzylidene)thiazolidin-4-one (compound **4s**): yellow solid; yield, 77.4%; m.p.: 153.2 – 153.8 °C; IR (KBr,  $\nu/\text{cm}^{-1}$ ): 3077.33 (=C-H, Ar-H), 2923.55 (C-H), 1713.03 (C=O), 1602.63 (C=C), 1508.16, 1428.57, 1371.43 (Ar), 693.88 (C-S-C);  $^1\text{H}$  NMR (600 MHz,  $\text{CDCl}_3$ )  $\delta$  7.68 (s, 1H, =C-H), 7.65 – 7.61 (m, 2H, Ar-H), 7.33 (d,  $J$  = 8.2 Hz, 2H, Ar-H), 6.31 – 6.27 (m, 1H, =C-H), 4.83 (dd,  $J$  = 5.6, 4.2 Hz, 2H, =CH<sub>2</sub>), 3.48 – 3.44 (m, 4H, N-CH<sub>3</sub> & CH), 2.51 – 2.35 (m, 2H, CH<sub>2</sub>), 2.27 – 2.18 (m, 2H, CH<sub>2</sub>), 2.02 (s, 3H, =C-CH<sub>3</sub>), 1.80 (s, 3H, =C-CH<sub>3</sub>);  $^{13}\text{C}$  NMR (151 MHz,  $\text{CDCl}_3$ )  $\delta$  166.88, 165.26, 157.23, 149.52 (d,  $J$  = 1.7 Hz), 148.01, 136.22, 133.35, 132.78, 131.46, 128.34, 123.72, 121.20, 110.08, 41.29, 31.14, 31.04, 30.04, 29.76 (q,  $J$  = 77.9 Hz), 20.62, 17.91; HRMS (APCI,  $m/z$ ): calcd. for  $\text{C}_{22}\text{H}_{23}\text{F}_3\text{N}_3\text{O}_2\text{S}^+$  ( $[\text{M}+\text{H}]^+$ ) 450.1463, found 450.1458.

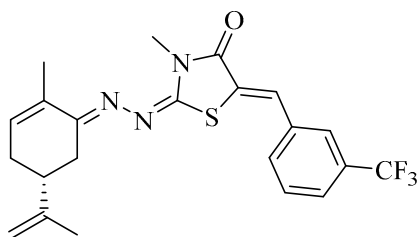

(*E*)-3-methyl-2-(((*R,E*)-2-methyl-5-(prop-1-en-2-yl)cyclohex-2-en-1-ylidene)hydrazineylidene)-5-((*Z*)-3-(trifluoromethyl)benzylidene)thiazolidin-4-one (compound **4t**): yellow solid; yield, 81.5%; m.p.: 121.0 – 122.4 °C; IR (KBr,  $\nu/\text{cm}^{-1}$ ): 3018.37 (=C-H, Ar-H), 2924.49 (C-H), 1710.20 (C=O), 1602.04 (C=C), 1563.27, 1432.65, 1371.43 (Ar), 695.92 (C-S-C);  $^1\text{H}$  NMR (600 MHz,  $\text{CDCl}_3$ )  $\delta$  7.81 (s, 1H, =C-H), 7.77 (d,  $J$  = 7.3 Hz, 1H, Ar-H), 7.70 (s, 1H, Ar-H), 7.65 – 7.59 (m, 2H, Ar-H), 6.29 (dd,  $J$  = 3.4, 1.4 Hz, 1H, =C-H), 4.82 (d,  $J$  = 8.7 Hz, 2H, =CH<sub>2</sub>), 3.48 – 3.43 (m, 4H, N-CH<sub>3</sub> & CH), 2.50 – 2.34 (m, 2H, CH<sub>2</sub>), 2.26 – 2.18 (m, 2H, CH<sub>2</sub>), 2.00 (s, 3H, =C-CH<sub>3</sub>), 1.80 (s, 3H, =C-CH<sub>3</sub>);  $^{13}\text{C}$  NMR (151 MHz,  $\text{CDCl}_3$ )  $\delta$  166.70, 165.35, 157.10, 147.98, 136.33, 134.99, 133.36, 132.40, 131.51 (q,  $J$  = 32.6 Hz), 129.54, 128.12, 126.82 (q,  $J$  = 3.9 Hz), 125.77 (q,  $J$  = 3.7 Hz), 125.00, 123.73 (d,  $J$  = 272.4 Hz), 110.09, 41.27, 31.14, 31.04, 30.06, 20.61, 17.79; HRMS (APCI,  $m/z$ ): calcd. for  $\text{C}_{22}\text{H}_{23}\text{F}_3\text{N}_3\text{O}\text{S}^+$  ( $[\text{M}+\text{H}]^+$ ) 434.1514, found 434.1508.



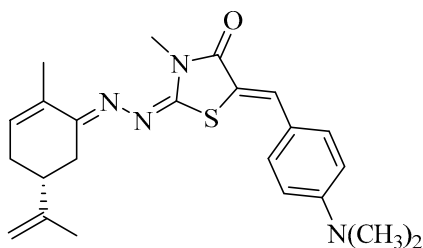

(*E*)-5-((*Z*)-4-(dimethylamino)benzylidene)-3-methyl-2-(((*R,E*)-2-methyl-5-(prop-1-en-2-yl) cyclohex-2-en-1-ylidene)hydrazineylidene)thiazolidin-4-one (compound **4u**): yellow solid; yield, 84.2%; m.p.: 195.0 – 195.8 °C; IR (KBr,  $\nu/\text{cm}^{-1}$ ): 3065.44 (=C-H, Ar-H), 2916.46 (C-H), 1704.23 (C=O), 1602.19 (C=C), 1579.74, 1522.60, 1426.68, 1369.54 (Ar), 689.95 (C-S-C);  $^1\text{H}$  NMR (600 MHz,  $\text{CDCl}_3$ )  $\delta$  7.66 (s, 1H, =C-H), 7.55 – 7.48 (m, 2H, Ar-H), 6.80 – 6.73 (m, 2H, Ar-H), 6.28 – 6.23 (m, 1H, =C-H), 4.82 (dd,  $J$  = 3.3, 1.7 Hz, 2H, =CH<sub>2</sub>), 3.50 – 3.43 (m, 4H, N-CH<sub>3</sub> & CH), 3.06 (s, 6H, -N(CH<sub>3</sub>)<sub>2</sub>), 2.50 – 2.33 (m, 2H, CH<sub>2</sub>), 2.25 – 2.18 (m, 2H, CH<sub>2</sub>), 2.03 (s, 3H, =C-CH<sub>3</sub>), 1.80 (s, 3H, =C-CH<sub>3</sub>);  $^{13}\text{C}$  NMR (151 MHz,  $\text{CDCl}_3$ )  $\delta$  167.74, 164.21, 158.60, 150.96, 148.19, 135.37, 133.53, 132.11, 131.25, 121.83, 116.23, 111.94, 109.97, 41.33, 40.09, 31.04, 29.78, 20.65, 17.97; HRMS (APCI,  $m/z$ ): calcd. for  $\text{C}_{23}\text{H}_{29}\text{N}_4\text{OS}^+$  ( $[\text{M}+\text{H}]^+$ ) 409.2062, found 409.2057.

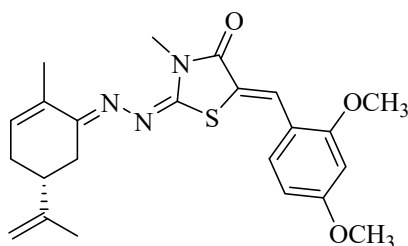

(*E*)-5-((*Z*)-2,4-dimethoxybenzylidene)-3-methyl-2-(((*R,E*)-2-methyl-5-(prop-1-en-2-yl)cyclohex-2-en-1-ylidene)hydrazineylidene)thiazolidin-4-one (compound **4v**): yellow solid; yield, 87.8%; m.p.: 246.1 – 247.3 °C; IR (KBr,  $\nu/\text{cm}^{-1}$ ): 3046.94 (=C-H, Ar-H), 2957.14 (C-H), 1695.92 (C=O), 1602.04 (C=C), 1587.76, 1557.14, 1504.08, 1436.73, 1371.43 (Ar), 695.92 (C-S-C);  $^1\text{H}$  NMR (600 MHz,  $\text{CDCl}_3$ )  $\delta$  8.07 (s, 1H, =C-H), 7.57 (d,  $J$  = 8.6 Hz, 1H, Ar-H), 6.63 (dd,  $J$  = 8.6, 2.3 Hz, 1H, Ar-H), 6.49 (d,  $J$  = 2.3 Hz, 1H, Ar-H), 6.25 (dd,  $J$  = 3.5, 1.4 Hz, 1H, =C-H), 4.82 (d,  $J$  = 5.0 Hz, 2H, =CH<sub>2</sub>), 3.88 (d,  $J$  = 7.8 Hz, 6H, -OCH<sub>3</sub>), 3.57 – 3.35 (m, 4H, N-CH<sub>3</sub> & CH), 2.51 – 2.32 (m, 2H, CH<sub>2</sub>), 2.26 – 2.15 (m, 2H, CH<sub>2</sub>), 2.01 (s, 3H, =C-CH<sub>3</sub>), 1.80 (s, 3H, =C-CH<sub>3</sub>);  $^{13}\text{C}$  NMR (151 MHz,  $\text{CDCl}_3$ ):  $\delta$  167.46, 164.41, 162.43, 159.86, 158.42, 148.15, 135.52, 133.48, 130.43, 125.36, 119.53, 116.50, 109.98, 105.06, 98.49, 55.55, 55.51, 41.31, 31.03, 29.79, 20.63, 17.92; HRMS (APCI,  $m/z$ ): calcd. for  $\text{C}_{23}\text{H}_{28}\text{N}_3\text{O}_3\text{S}^+$  ( $[\text{M}+\text{H}]^+$ ) 426.1851, found 426.1846.

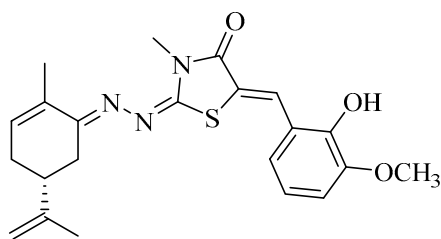

(*E*)-5-((*Z*)-2-hydroxy-3-methoxybenzylidene)-3-methyl-2-(((*R,E*)-2-methyl-5-(prop-1-en-2-yl)cyclohex-2-en-1-ylidene)hydrazineylidene)thiazolidin-4-one (compound **4w**): yellow solid; yield, 82.5%; m.p.: 250.4 – 252.9 °C; IR (KBr,  $\nu/\text{cm}^{-1}$ ): 3410.33 (O-H), 3030.74 (=C-H, Ar-H), 2965.44, 2912.38 (C-H), 1669.53 (C=O), 1600.15 (C=C), 1569.53, 1479.74, 1422.60, 1373.62 (Ar), 685.87 (C-S-C);  $^1\text{H}$  NMR (600 MHz, DMSO- $d_6$ )  $\delta$  8.25 (s, 1H, =C-H), 6.81 (dd,  $J$  = 8.1, 1.4 Hz, 1H, Ar-H), 6.46 (dd,  $J$  = 7.5, 1.4 Hz, 1H, Ar-H), 6.24 (dd,  $J$  = 3.1, 1.5 Hz, 1H, =C-H), 5.96 (t,  $J$  = 7.7 Hz, 1H, Ar-H), 4.78 (d,  $J$  = 8.0 Hz, 2H, =CH<sub>2</sub>), 3.61 (s, 3H, -OCH<sub>3</sub>), 3.36 – 3.26 (m, 4H, N-CH<sub>3</sub> & CH), 2.41 – 2.27 (m, 2H, CH<sub>2</sub>), 2.23 – 2.14 (m, 2H, CH<sub>2</sub>), 1.91 (s, 3H, =C-CH<sub>3</sub>), 1.74 (s, 3H, =C-CH<sub>3</sub>);  $^{13}\text{C}$  NMR (151 MHz, DMSO- $d_6$ ):  $\delta$  167.70, 166.91, 162.27, 160.25, 153.37, 148.33, 135.18, 133.03, 132.54, 122.01, 120.40, 111.79, 110.54, 107.97, 107.39, 55.31, 41.18, 30.81, 30.75, 29.68, 20.88, 18.17; HRMS (APCI,  $m/z$ ): calcd. for C<sub>22</sub>H<sub>26</sub>N<sub>3</sub>O<sub>3</sub>S<sup>+</sup> ([M+H]<sup>+</sup>) 412.1695, found 412.1689.

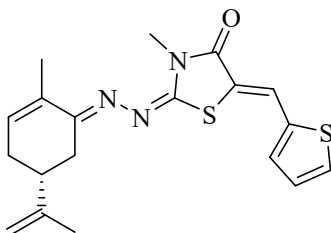

(2*E*,5*Z*)-3-methyl-2-(((*R,E*)-2-methyl-5-(prop-1-en-2-yl)cyclohex-2-en-1-ylidene)hydrazineylidene)-5-(thiophen-2-ylmethylene)thiazolidin-4-one (compound **4x**): yellow solid; yield, 84.3%; m.p.: 165.1 – 165.7 °C; IR (KBr,  $\nu/\text{cm}^{-1}$ ): 3120.41, 3069.39 (=C-H, Ar-H), 2944.90, 2914.29 (C-H), 1697.96 (C=O), 1620.41, 1597.96 (C=C), 1432.65, 1375.51 (Ar), 714.29 (C-S-C);  $^1\text{H}$  NMR (600 MHz, CDCl<sub>3</sub>)  $\delta$  7.89 (s, 1H, =C-H), 7.59 (d,  $J$  = 5.0 Hz, 1H, Ar-H), 7.38 (d,  $J$  = 3.6 Hz, 1H, Ar-H), 7.18 (dd,  $J$  = 5.0, 3.7 Hz, 1H, Ar-H), 6.29 – 6.25 (m, 1H, =C-H), 4.82 (dd,  $J$  = 6.0, 0.9 Hz, 2H, =CH<sub>2</sub>), 3.47 – 3.43 (m, 4H, N-CH<sub>3</sub> & CH), 2.50 – 2.34 (m, 2H, CH<sub>2</sub>), 2.26 – 2.18 (m, 2H, CH<sub>2</sub>), 2.02 (s, 3H, =C-CH<sub>3</sub>), 1.80 (s, 3H, =C-CH<sub>3</sub>);  $^{13}\text{C}$  NMR (151 MHz, CDCl<sub>3</sub>):  $\delta$  166.89, 164.86, 157.65, 148.06, 138.63, 135.94, 133.45, 131.75, 130.32, 128.27, 122.88, 121.01, 110.05, 41.30, 31.14, 31.05, 30.01, 20.63, 17.88; HRMS (APCI,  $m/z$ ): calcd. for C<sub>19</sub>H<sub>22</sub>N<sub>3</sub>OS<sub>2</sub><sup>+</sup> ([M+H]<sup>+</sup>) 372.1204, found 372.1199.

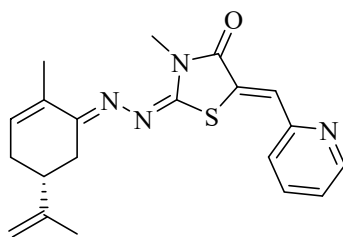

(2*E*,5*Z*)-3-methyl-2-(((*R,E*)-2-methyl-5-(prop-1-en-2-yl)cyclohex-2-en-1-ylidene)hydrazineylidene)-5-(pyridin-2-ylmethylene)thiazolidin-4-one (compound **4y**): yellow solid; yield, 86.0%; m.p.: 145.8 – 146.7 °C; IR (KBr,  $\nu/\text{cm}^{-1}$ ): 3081.63, 3030.61 (=C-H, Ar-H), 2963.27, 2942.86, 2914.29 (C-H), 1708.16 (C=O), 1626.53, 1608.16 (C=C), 1432.65, 1377.55 (Ar), 706.12 (C-S-C);  $^1\text{H}$  NMR (600 MHz,  $\text{CDCl}_3$ )  $\delta$  8.83 (d,  $J = 2.2$  Hz, 1H, Ar-H), 8.59 (dd,  $J = 4.8, 1.5$  Hz, 1H, Ar-H), 7.90 – 7.86 (m, 1H, Ar-H), 7.65 (s, 1H, =C-H), 7.42 (dd,  $J = 8.0, 4.8$  Hz, 1H, Ar-H), 6.29 – 6.26 (m, 1H, =C-H), 4.82 – 4.79 (m, 2H, =CH<sub>2</sub>), 3.46 – 3.41 (m, 4H, N-CH<sub>3</sub> & CH), 2.49 – 2.33 (m, 2H, CH<sub>2</sub>), 2.25 – 2.17 (m, 2H, CH<sub>2</sub>), 1.99 (s, 3H, =C-CH<sub>3</sub>), 1.79 (s, 3H, =C-CH<sub>3</sub>);  $^{13}\text{C}$  NMR (151 MHz,  $\text{CDCl}_3$ ):  $\delta$  166.58, 165.39, 156.98, 151.31, 149.75, 147.96, 136.36, 136.07, 133.33, 130.27, 126.08, 125.36, 123.74, 110.10, 41.26, 31.14, 31.03, 30.11, 20.61, 17.89; HRMS (APCI,  $m/z$ ): calcd. for  $\text{C}_{20}\text{H}_{23}\text{N}_4\text{OS}^+$  ( $[\text{M}+\text{H}]^+$ ) 367.1593, found 367.1587.

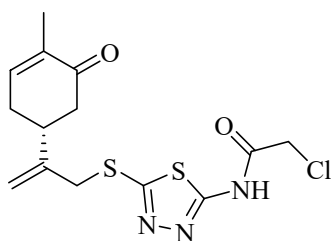

(*R*)-2-chloro-*N*-(5-((2-(4-methyl-5-oxocyclohex-3-en-1-yl)allyl)thio)-1,3,4-thiadiazol-2-yl) acetamide (intermediate **6** / *L*-carvone-derived 1,3,4-thiadiazole-amide): white solid; yield, 71.6%; m.p.: 102.5 – 103.0 °C;  $^1\text{H}$  NMR (600 MHz,  $\text{CDCl}_3$ )  $\delta$  6.77 (ddd,  $J = 5.6, 2.4, 1.3$  Hz, 1H, =C-H), 5.22 (s, 1H, =CH<sub>2</sub>-a), 5.06 (s, 1H, =CH<sub>2</sub>-b), 4.46 (s, 2H, Cl-CH<sub>2</sub>), 3.96 (s, 2H, -S-CH<sub>2</sub>), 3.01 – 2.96 (m, 1H, CH), 2.70 – 2.55 (m, 2H, CH<sub>2</sub>), 2.44 – 2.33 (m, 2H, CH<sub>2</sub>), 1.80 (s, 3H, -CH<sub>3</sub>);  $^{13}\text{C}$  NMR (151 MHz,  $\text{CDCl}_3$ )  $\delta$  198.88, 164.98, 160.28, 160.14, 144.75, 144.04, 135.68, 115.36, 43.22, 42.11, 39.03, 38.84, 31.55, 15.69.
